# Supplementary material for: Prices, taxes and alcohol use: a systematic umbrella review
Source: PubMed Central journal article supplement — Addiction. 2022 Jun 28;117(12):3004–23. doi: 10.1111/add.15966 (PMC9796894; doi:10.1111/add.15966), 2022-06-28
Supplement: ADD-117-3004-s001.pdf [file ADD-117-3004-s001.pdf]

## Appendix 1. Search strategy

Searches in MEDLINE, EconLit and Embase last conducted on January 17, 2022.

Search in MEDLINE:

((pric\* OR tax\* OR fiscal\*)) AND (Alcohol drinking(MeSH) OR Alcohol\* drink\* OR Alcoholic beverages(MeSH) OR Alcohol\* beverage\* OR Beer(MeSH) OR Beer\* OR Wine(MeSH) OR Wine\* OR Liquor\* OR Spirits OR Alcohol\*) AND review\*

Search in EconLit:

(TI(alcohol\* OR wine\* OR beer OR spirit\* OR liquor\*) OR AB(alcohol\* OR wine\* OR beer OR spirit\* OR liquor\*)) AND (TI(tax\* OR price\* OR fiscal\* OR elasticit\*) OR AB(tax\* OR price\* OR fiscal\* OR elasticit\*)) AND (TI(review\*) OR AB(review\*))

Search in Embase:

1. pric\*.mp.
2. tax\*.mp.
3. fiscal\*.mp.
4. 1 or 2 or 3
5. Alcohol drinking.mp. or exp drinking behavior /
6. Alcohol drink.mp.
7. exp alcoholic beverage /
8. exp alcohol consumption / or Alcohol beverage.mp.
9. beer.mp. or exp beer /
10. exp wine / or wine.mp.
11. Liquor.mp.
12. Spirits.mp.
13. Alcohol.mp.
14. 5 or 6 or 7 or 8 or 9 or 10 or 11 or 12 or 13
15. "review" /
16. 4 and 14 and 15

Search in LILACS, last conducted on January 12, 2022:

tw:(tw:((tw:(pric\*)) OR (tw:(tax\*)) AND (tw:(liquor\*)) OR (tw:(spirits)) OR (tw:(beer\*)) OR (tw:(wine)) OR (tw:(alcohol)) OR (mh:(alcohol beverages)) OR (mh:(beer)) OR (mh:(wine)) OR (mh:(alcohol drinking)))) AND ( db:("LILACS") AND type\_of\_study:(("systematic\_reviews"))) AND ( type\_of\_study: ("systematic\_reviews" OR "overview" OR "policy\_brief" OR "sysrev\_observational\_studies" OR "structured\_summary\_of\_systematic\_review"))

Search in Chinese, last conducted July, 2016

We searched, in Chinese, a number of Chinese databases and online resources including the airiti Library, [cnki.net](http://cnki.net), the Hong Kong Macau Periodicals Network, [duxiu.com](http://duxiu.com), [cnbksy.cn](http://cnbksy.cn), [readopac.ncl.edu.tw](http://readopac.ncl.edu.tw) and [hkjo.lib.hku.hk](http://hkjo.lib.hku.hk).

**Appendix 2.** List of studies included in each ‘umbrella reviews of review’ and ‘review’

— Review of reviews

**Anderson P, Chisholm D, Fuhr DC. Effectiveness and cost-effectiveness of policies and programmes to reduce the harm caused by alcohol. *The Lancet* 2009; 373(9682): 2234-46.**

Number of studies:

- Reviews: 3 (Cook, 2007; Fogarty, 2006; Gallet, 2007; Wagenaar et al., 2009)
- High-income: 3 (Chaloupka et al., 2002; Farrell et al., 2003; Makela & Osterberg, 2009)
- LMIC: 1 (China) (Pan et al., 2006)

**Jackson R, Johnson M, Campbell F, et al. Interventions on Control of Alcohol Price, Promotion and Availability for Prevention of Alcohol Use Disorders in Adults and Young People. Sheffield: School of Health and Related Research, University of Sheffield, 2010.**

Number of studies:

- Reviews: 4 (Booth et al., 2008; Fogarty, 2006; Gallet, 2007; Wagenaar et al., 2009)
- High-income: 0
- LMIC: 0

**Martineau F, Tyner E, Lorenc T, Petticrew M, Lock K. Population-level interventions to reduce alcohol-related harm: an overview of systematic reviews. *Prev Med* 2013; 57(4): 278-96.**

Number of studies:

- Reviews: 3 (Booth et al., 2008; Elder et al., 2010; Jackson et al., 2010)
- High-income: 0
- LMIC: 0

**Stockings E, Hall WD, Lynskey M, et al. Prevention, early intervention, harm reduction, and treatment of substance use in young people. *Lancet Psychiatry* 2016; 3(3): 280-96.**

Number of studies:

- Reviews: 2 (Elder et al., 2010; Martineau et al., 2013)
- High-income: 0
- LMIC: 0

**Burton R, Henn C, Lavoie D, et al. A rapid evidence review of the effectiveness and cost-effectiveness of alcohol control policies: an English perspective. *Lancet* 2017; 389(10078): 1558-80.**

Number of studies:

- Reviews: 7 (Anderson et al., 2009; Dhalwani, 2011; Elder et al., 2010; Fogarty, 2010; OECD, 2015; Wagenaar et al., 2009; Xu & Chaloupka, 2011)
- High-income: 2 (Crawford et al., 2012; Stockwell, Zhao, et al., 2012)
- LMIC: 0

**Siegfried N, Parry C. Do alcohol control policies work? An umbrella review and quality assessment of systematic reviews of alcohol control interventions (2006 - 2017). *PLoS One* 2019; 14(4): e0214865.**

Number of studies:

- Reviews: 7 (Boniface et al., 2017; Elder et al., 2010; Korczak et al., 2011; Li et al., 2015; Nelson, 2015; Nelson & McNall, 2016; Wagenaar et al., 2009)
- High-income: 0
- LMIC: 0

— Reviews

**Ornstein SI. Control of alcohol consumption through price increase. *J Stud Alcohol* 1980; 41(9): 807-18.**  
**Ornstein SI, Levy D. Price and income elasticities of demand for alcoholic beverages. *Recent Dev Alcohol* 1983; 1: 303-45.**

Number of studies:

- High-income: 23 (Comanor & Wilson, 1974; Commission des Communautés Européennes, 1972; Grabowski, 1976; Hogarty & Elzinga, 1972; Horowitz & Horowitz, 1965; Huitfeldt & Jorner, 1972; Johnson & Oksanen, 1974, 1977; Labys, 1976; Lau, 1975; Lidman, 1976; Malmquist, 1948; Miller & Roberts, 1972; Niskanen, 1960; Norman, 1975; Nyberg, 1967; Prest, 1949; Simon, 1966; Smith, 1976; Stone, 1945, 1951; Wales, 1968; Walsh & Walsh, 1970)
- LMIC: 0

**Leung SF, Phelps CE. My kingdom for a drink ...? A review of estimates of the price sensitivity of demand for alcoholic beverages. In: Hilton ME, Bloss G, eds. *Economics and the Prevention of Alcohol-Related Problems NIAAA Research Monograph No 25 NIH Pub No 93-3513. Bethesda, MD: National Institute on Alcohol Abuse and Alcoholism; 1993: 1-31.***

Number of studies:

- High-income: 22 (Adrian & Ferguson, 1987; Atkinson et al., 1990; Clements & Johnson, 1983; Coate & Grossman, 1988; Cook, 1981; Cook & Tauchen, 1982; Duffy, 1983; Godfrey, 1988; Grossman et al., 1987; Heien & Pompelli, 1989; Jones, 1989; Kendell et al., 1983; Kenkel, 1990; Levy & Shefflin, 1983; Nelson, 1990; Ornstein & Hanssens, 1985; Schweitzer et al., 1983; Selvanathan, 1988; Thom, 1984; Tsolakis et al., 1983; Uri, 1986)
- LMIC: 0

**Edwards G, Anderson P, Babor TF, et al. *Alcohol policy and the public good. Oxford: Oxford University Press; 1994.***

Number of studies:

- High-income: 43 (Baker & McKay, 1990; Bryding & Rosen, 1969; Clements & Johnson, 1983; Clements & Selvanathan, 1988; Clements & Selvanathan, 1991; Comanor & Wilson, 1974; Duffy, 1983, 1991; Duffy, 1987; Eecen, 1985, 1985; Godfrey, 1988; Hogarty & Elzinga, 1972; Horverak, 1979; Huitfeldt & Jorner, 1972; Johnson & Oksanen, 1974, 1977; Johnson et al., 1992; Jones, 1989; Labys, 1976; Lau, 1975; Lidman, 1976; Malmquist, 1948; McGuinness, 1983; Miller & Roberts, 1972; Niskanen, 1960; Norman, 1975; Nyberg, 1967; Pearce, 1985; Prest, 1949; Quek, 1988; Salo, 1990; Selvanathan, 1988, 1991; Simon, 1966; Smith, 1976; Stone, 1945, 1951; Sundström & Ekström, 1962; Walsh, 1982; Walsh & Walsh, 1970; Wette et al., 1993; Wong, 1988)
- LMIC: 1 (Kenya) (Partanen, 1991)

**Fogarty J. The nature of the demand for alcohol: understanding elasticity. *British Food Journal* 2006; 108(4): 316-32.**

Number of studies:

- High-income: 43 (Baker & McKay, 1990; Bryding & Rosen, 1969; Clements & Johnson, 1983; Clements, 1987; Clements & Selvanathan, 1991; Comanor & Wilson, 1974; Commission des Communautés Européennes, 1972; Duffy, 1983, 1991; Duffy, 1987; Eecen, 1985; Godfrey, 1988; H.M. Treasury, 1980; Hogarty & Elzinga, 1972; Horverak, 1979; Huitfeldt & Jorner, 1972; Johnson & Oksanen, 1974, 1977; Johnson et al., 1992; Jones, 1989; Labys, 1976; Malmquist, 1948; McGuinness, 1983; Miller & Roberts, 1972; Niskanen, 1960; Niskanen, 1962; Norman, 1975; Pearce, 1985; Prest, 1949; Quek, 1988; Salo, 1990;

Selvanathan, 1988, 1991; Simon, 1966; Smith, 1976; Stone, 1945, 1951; Sundström & Ekström, 1962; Theil & Clements, 1987; Walsh, 1982; Walsh & Walsh, 1970; Wette et al., 1993; Wong, 1988)  
– LMIC: 1 (Kenya) (Partanen, 1991)

**Gallet CA. The demand for alcohol: a meta-analysis of elasticities. *Australian Journal of Agricultural and Resource Economics* 2007; 51(2): 121-35.**

Number of studies:

– High-income: unclear (132 studies that examined price, income or advertising elasticities) (Adrian & Ferguson, 1987; Ahtola et al., 1986; Andrikopoulos et al., 1997; Andrikopoulos & Loizides, 2000; Angulo et al., 2001; Atkinson et al., 1990; Baltagi & Griffin, 1995, 2002; Barsby & Marshall, 1977; Bask & Melkersson, 2004; Bentzen et al., 1999; Bielińska-Kwapisz & Young, 2001; Blake & Nied, 1997; Blaylock & Blisard, 1993; Blaylock & Blisard, 1993; Bourgeois & Barnes, 1979; Buccola & VanderZanden, 1997; Calfee & Scheraga, 1994; Chang et al., 2002; Clements & Johnson, 1983; Clements, 1987; Clements & Selvanathan, 1988; Clements & Selvanathan, 1991; Clements & Selvanathan, 1995; Clements et al., 1997; Comanor & Wilson, 1974; Conrad, 1989; Cook & Tauchen, 1982; Crawford et al., 1999; Crooks, 1989; Decker & Schwartz, 2000; Duffy, 1982, 1982, 1983, 1990, 1991, 1995, 2001, 2003; Duffy, 1987; Edward et al., 2001; Florkowski & McNamara, 1992; Franke & Wilcox, 1987; Freeman, 1999, 2000; Gallet, 1999; Gallet & List, 1998; Gao et al., 1995; Godfrey, 1988; Goel & Morey, 1995; Grabowski, 1976; Grossman et al., 1998; Grossman & Markowitz, 1999; Gruber et al., 2003; Heien & Pompelli, 1989; Hogarty & Elzinga, 1972; Holm, 1995; Huang, 2003; Johnson & Oksanen, 1974, 1977; Johnson et al., 1992; Johnson, 1985; Jones, 1989; Kenkel, 1996; Labys, 1976; Larivière et al., 2000; Larue et al., 1991; Lau, 1975; Lee & Tremblay, 1992; Leppänen et al., 2001; Levy & Sheflin, 1983; Levy & Sheflin, 1985; Lynk, 1984; Malmquist, 1948; Manning et al., 1995; Mast et al., 1999; Mayo, 2000; McCornac & Filante, 1984; McGahan, 1995; McGuinness, 1980, 1983; Miller & Roberts, 1972; Moosa & Baxter, 2002; Nayga Jr & Capps Jr, 1994; Nelson, 1990, 1997, 1999, 2003; Nelson & Moran, 1995; Nelson & Young, 2001; Nerlove & Addison, 1958; Niskanen, 1960; Ornstein & Hanssens, 1985; Owen, 1979; Pacula, 1998; Pagoulatos & Sorensen, 1986; Penm, 1988; Pompelli & Heien, 1991; Prest, 1949; Saffer, 2000; Saffer & Dave, 2002; Salisu & Balasubramanyam, 1997; Sander, 1999; Sass & Saurman, 1993, 2001; Schweitzer et al., 1983; Selvanathan, 1988, 1989, 1991, 1995; Smith, 1976; Spurry, 1999; Stone, 1945; Su & Yen, 2000; Swidler, 1986; Tegene, 1990; Theil & Clements, 1987; Thom, 1984; Tsolakis et al., 1983; Uri, 1986; Wales, 1968; Walsh, 1982; Walsh & Walsh, 1970; Wilkinson, 1987; Yamada et al., 1996; Yen, 1994, 1995; Yen & Jensen, 1996; Yu & Chen, 1998; Zardkoohi & Sheer, 1984)  
– LMIC: 1 (Karnataka, India) (Musgrave & Stern, 1988)

**Booth A, Brennan A, Meier P, et al. Independent review of the effects of alcohol pricing and promotion: part a – systematic reviews. Sheffield: School of Health and Related Research, University of Sheffield, 2008.**

Number of studies:

– Reviews: 2 (Gallet, 2007; Wagenaar et al., 2009)  
– High-income: 15 (Chaloupka & Wechsler, 1996; Chen et al., 2006; Freeman, 2000; Gius, 2002; Heeb et al., 2003; Huang, 2003; Keng & Huffman, 2007; Kuo, Heeb, et al., 2003; Laixuthai & Chaloupka, 1993; Makela et al., 2008; Mohler-Kuo et al., 2004; Selvanathan & Selvanathan, 2005; Stehr, 2007; Wechsler et al., 2000; Zhang & Casswell, 1999)  
– LMIC: 0

**Wagenaar AC, Salois MJ, Komro KA. Effects of beverage alcohol price and tax levels on drinking: a meta-analysis of 1003 estimates from 112 studies. *Addiction* 2009; 104(2): 179-90.**

Number of studies:

– High-income: unclear (112 but only 105 references could be identified) (Adrian & Ferguson, 1987; Angulo et al., 2001; Asplund et al., 2007; Baltagi & Goel, 1990; Baltagi & Griffin, 1995, 2002; Bask &

Melkersson, 2004; Beard et al., 1997; Bentzen et al., 1999; Bishai et al., 2005; Blake & Nied, 1997; Bourgeois & Barnes, 1979; Brinkley, 1999; Cameron & Williams, 2001; Chaloupka & Laixuthai, 1997; Chaloupka & Wechsler, 1996; Clements & Johnson, 1983; Clements & Selvanathan, 1991; Clements et al., 1997; Coate & Grossman, 1988; Cook, 1982; Cook & Moore, 1993, 1994; Dee, 1999; DiNardo & Lemieux, 2001; Duffy, 1981, 1983; Duffy, 1987; Farrell et al., 2003; Freeman, 2000; French et al., 2006; Gao et al., 1995; Gius, 2005; Godfrey, 1988; Goel & Morey, 1995; Grossman et al., 1998; Grossman et al., 1987; Grossman & Markowitz, 1999; Hamilton & Hamilton, 1997; Harris et al., 2006; Heien & Pompelli, 1989; Henderson et al., 2004; Hoadley et al., 1984; Hogarty & Elzinga, 1972; Holm & Suoniemi, 1992; Johnson & Oksanen, 1974, 1977; Johnson et al., 1992; Jones, 1989; Keng & Huffman, 2007; Kenkel, 1993, 1996; Kubik & Moran, 2002; Kuo, Heeb, et al., 2003; Labys, 1976; Laixuthai & Chaloupka, 1993; Lee & Tremblay, 1992; Leppänen et al., 2001; Levy & Sheflin, 1983; Lyon & Schwab, 1991; Manning et al., 1995; Mast et al., 1999; McCornac & Filante, 1984; McGuinness, 1980; Musgrave & Stern, 1988; Nelson, 1990, 1997, 2003; Nelson & Moran, 1995; Norström, 2005; Ornstein & Hanssens, 1985; Pacula, 1998; Powell et al., 2002; Rabow et al., 1982; Ruhm, 1995; Rush et al., 1986; Saffer, 1989; Salisu & Balasubramanyam, 1997; Selvanathan, 1988, 1991; Skog & Melberg, 2006; Sloan et al., 1995; Smart & Mann, 1998; Smith, 1976; Stout et al., 2000; Sutton & Godfrey, 1995; Thom, 1984; Treno et al., 1993; Trollidal & Ponicki, 2005; Uri, 1986; Wales, 1968; Walsh, 1982; Walsh & Walsh, 1970; Wang et al., 1996; Waters & Sloan, 1995; Wette et al., 1993; Wilkinson, 1987; Williams et al., 2005; Williams et al., 2004; Williams et al., 2003; Yen, 1994; Young & Bielinska-Kwapisz, 2003; Zhang & Casswell, 1999; Zhao & Harris, 2004)

– LMIC: 1 (Karnataka, India) (Musgrave & Stern, 1988)

**Elder RW, Lawrence B, Ferguson A, et al. The effectiveness of tax policy interventions for reducing excessive alcohol consumption and related harms. *Am J Prev Med* 2010; 38(2): 217-29.**

Number of studies:

– High-income: 46 (Adrian & Ferguson, 1987; Baltagi & Goel, 1990; Blake & Nied, 1997; Chaloupka & Wechsler, 1996; Coate & Grossman, 1988; Cook, 1981, 1982; Cook & Moore, 1994; Decker & Schwartz, 2000; Dee, 1999; Duffy, 1981; Duffy, 1987; Gius, 2002; Goel & Morey, 1995; Grossman et al., 1998; Grossman et al., 1987; Gruenewald et al., 1992; Heeb et al., 2003; Heien & Pompelli, 1989; Hogarty & Elzinga, 1972; Johnson & Oksanen, 1974; Johnson et al., 1992; Jones, 1989; Kenkel, 1993, 1996; Kuo, Heeb, et al., 2003; Labys, 1976; Laixuthai & Chaloupka, 1993; Lee & Tremblay, 1992; Leskinen & Teräsvirta, 1976; Levy & Sheflin, 1983; Manning et al., 1995; Nelson, 1990, 1997; Nelson & Moran, 1995; Pacula, 1998; Selvanathan, 1988; Simon, 1966; Sloan et al., 1994; Stout et al., 2000; Uri, 1986; Wette et al., 1993; Wilkinson, 1987; Yen, 1994; Young & Bielinska-Kwapisz, 2003; Zhang & Casswell, 1999)

– LMIC: 0

**Fogarty J. The demand for beer, wine and spirits: a survey of the literature. *Journal of Economic Surveys* 2010; 24(3): 428-78.**

Number of studies:

– High-income: 105 (Adrian & Ferguson, 1987; Alley et al., 1992; Andrikopoulos et al., 1997; Andrikopoulos & Loizides, 2000; Angulo et al., 2001; Baker & McKay, 1990; Baltagi & Goel, 1990; Baltagi & Griffin, 1995, 2002; Bentzen et al., 1999; Bentzen et al., 1997; Blake & Nied, 1997; Bryding & Rosen, 1969; Chang et al., 2002; Clements & Johnson, 1983; Clements, 1987; Clements & Selvanathan, 1988; Clements & Selvanathan, 1991; Clements et al., 1997; Comanor & Wilson, 1974; Cook & Tauchen, 1982; Crawford et al., 1999; Crawford & Tanner, 1995; Duffy, 1983, 1995, 2001, 2003; Duffy, 1987; Eakins & Gallagher, 2003; Edward et al., 2001; Eecen, 1985; Elzinga & Hogarty, 1973; Florkowski & McNamara, 1992; Gallet, 1999; Gallet & List, 1998; Gao et al., 1995; Godfrey, 1988; Goel & Morey, 1995; Gruenewald et al., 2006; Hausman et al., 1994; Heien & Pompelli, 1989; Heien & Sims, 2000; Hogarty & Elzinga, 1972; Holm, 1995; Holm & Suoniemi, 1992; Horverak, 1979; Huang, 2003; Huitfeldt & Jorner, 1972; Johnson & Oksanen, 1974, 1977; Johnson et al., 1992; Jones, 1989; Labys, 1976; Larivière et al., 2000; Lau, 1975; Lee & Tremblay, 1992; Levi

& Folwell, 1995; Malmquist, 1948; McCornac & Filante, 1984; McGuinness, 1983; Miller & Roberts, 1972; Moosa & Baxter, 2002; Nelson, 1990, 1997, 1999, 2003; Nelson & Moran, 1995; Niskanen, 1960; Norman, 1975; Norström, 2005; Nyberg, 1967; Ornstein & Hanssens, 1985; Owen, 1979; Pearce, 1985; Penm, 1988; Prest, 1949; Quek, 1988; Sabuhoro et al., 1997; Salisu & Balasubramanyam, 1997; Salo, 1990; Selvanathan & Selvanathan, 2004; Selvanathan, 1988, 1991; Selvanathan, 2017; Selvanathan & Selvanathan, 2005; Simon, 1966; Skog & Melberg, 2006; Smith, 1976; Stone, 1945, 1951; Stone & Rowe, 1958; Sundström & Ekström, 1962; Taplin & Ryan, 1969; Tegene, 1990; Theil & Clements, 1987; Thom, 1984; Trolldal & Ponicki, 2005; Uri, 1986; Walsh, 1982; Walsh & Walsh, 1970; Wang et al., 1996; Wette et al., 1993; Wong, 1988; Yu & Chen, 1998; Zhang & Casswell, 1999)  
– LMIC: 1 (Kenya) (Partanen, 1991)

**Patra J, Giesbrecht N, Rehm J, Bekmuradov D, Popova A. Are alcohol prices and taxes an evidence-based approach to reducing alcohol-related harm and promoting public health and safety? A literature review. Contemporary Drug Problems 2012; 39(1): 7-48.**

Number of studies:

– Reviews: 1 (Elder et al., 2010)  
– High-income: 22 (Adams & Effertz, 2010; Andreasson et al., 2006; Chaloupka & Wechsler, 1996; Coate & Grossman, 1988; Farrell et al., 2003; Gmel et al., 2008; Grittner et al., 2009; Gruenewald et al., 2006; Gustafsson, 2010; Heeb et al., 2003; Helakorpi et al., 2010; Hollingworth et al., 2006; Kenkel, 1993; Kuo, Heeb, et al., 2003; Kuo, Wechsler, et al., 2003; Laixuthai & Chaloupka, 1993; M et al., 2004; Makela et al., 2008; Makela & Osterberg, 2009; Meier et al., 2010; Müller et al., 2010; Stockwell et al., 2001)  
– LMIC: 0

**Sornpaisarn B, Shield K, Cohen J, Schwartz R, Rehm J. Elasticity of alcohol consumption, alcohol-related harms, and drinking initiation in low- and middle-income countries: A systematic review and meta-analysis. The International Journal of Alcohol and Drug Research 2013; 2(1).**

Number of studies:

– High-income: 0  
– LMIC: 12 (Andrienko & Nemtsov, 2005; Fan et al., 1995; John, 2005; Musgrave & Stern, 1988; Okello, 2001; Osoro et al., 2001; Özgüven, 2004; Pan et al., 2006; Partanen, 1991; Poapongsakorn et al., 2007; Selvanathan & Selvanathan, 2005; Yu & Abler, 2010)

**van Walbeek C, Blecher E. The Economics of alcohol use, misuse and policy in South Africa. Cape Town: University of Cap Town, World Health Organization South Africa Office, 2014.**

Number of studies:

– High-income: 76 (Adrian & Ferguson, 1987; Alley et al., 1992; Andrikopoulos et al., 1997; Andrikopoulos & Loizides, 2000; Angulo et al., 2001; Baker & McKay, 1990; Baltagi & Goel, 1990; Baltagi & Griffin, 1995, 2002; Bentzen et al., 1999; Blake & Nied, 1997; Clements & Johnson, 1983; Clements, 1987; Clements & Selvanathan, 1988; Clements & Selvanathan, 1991; Clements et al., 1997; Comanor & Wilson, 1974; Cook & Tauchen, 1982; Crawford et al., 1999; Crawford & Tanner, 1995; Duffy, 1983, 2001, 2003; Duffy, 1987; Eakins & Gallagher, 2003; Edward et al., 2001; Gallet, 1999; Gallet & List, 1998; Gao et al., 1995; Godfrey, 1988; Goel & Morey, 1995; Gruenewald et al., 2006; Hausman et al., 1994; Heien & Pompelli, 1989; Hogarty & Elzinga, 1972; Holm, 1995; Holm & Suoniemi, 1992; Huitfeldt & Jorner, 1972; Johnson & Oksanen, 1977; Jones, 1989; Labys, 1976; Larivière et al., 2000; Lee & Tremblay, 1992; Levi & Folwell, 1995; Malmquist, 1948; McGuinness, 1980, 1983; Moosa & Baxter, 2002; Nelson, 1997, 1999, 2003; Nelson & Moran, 1995; Niskanen, 1960; Norman, 1975; Norström, 2005; Ornstein & Hanssens, 1985; Pearce, 1985; Prest, 1949; Ramful & Zhao, 2008; Salisu & Balasubramanyam, 1997; Selvanathan & Selvanathan, 2004; Selvanathan, 1988, 1991; Selvanathan & Selvanathan, 2005; Simon, 1966; Skog & Melberg, 2006; Smith,

1976; Stone, 1945; Tegene, 1990; Thom, 1984; Trollidal & Ponicki, 2005; Uri, 1986; Walsh, 1982; Wang et al., 1996; Wong, 1988; Zhang & Casswell, 1999)

– LMIC: 7 (China; India, Kenya, Russia, South Africa, 19 LMICs) (Andrienko & Nemtsov, 2005; Bureau for Economic Research, 2010; John, 2005; Okello, 2001; Selvanathan & Selvanathan, 2005; South African National Treasury & Tax Policy Chief Directorate, 2002; Tian & Liu, 2011)

**Li Q, Babor TF, Zeigler D, et al. Health promotion interventions and policies addressing excessive alcohol use: a systematic review of national and global evidence as a guide to health-care reform in China. *Addiction* 2015; 110 Suppl 1: 68-78.**

Number of studies:

– High-income: 1 (Chung et al., 2013)

– LMIC: 0

**Chen D, Abler D, Zhou D, Yu X, Thompson W. A Meta-analysis of Food Demand Elasticities for China. *Applied Economic Perspectives and Policy* 2016; 38(1): 50-72.**

Number of studies

– High-income: 0

– LMIC: 12 (China) (Bishop et al., 2007; Chang & Li, 2006; Dong, 2009; Dong & Lu, 2009; Fan et al., 1994; Fan et al., 1995; Mu et al., 2001; Wang et al., 1997; Wu & Wu, 1997; Yu & Abler, 2010; Zhang et al., 2001; Zhou, 2003)

**Boniface S, Scannell JW, Marlow S. Evidence for the effectiveness of minimum pricing of alcohol: a systematic review and assessment using the Bradford Hill criteria for causality. *BMJ Open* 2017; 7(5): e013497.**

Number of studies:

– Reviews: 2 (Booth et al., 2008; Wagenaar et al., 2009)

– High-income: 15 (Babor et al., 1978; Black et al., 2011; Callinan et al., 2015; Cousins et al., 2016; Crawford et al., 2012; Falkner et al., 2015; Forsyth et al., 2014; Herttua et al., 2015; Ludbrook et al., 2012; Sharma et al., 2014; Sheron et al., 2014; Stockwell, Auld, et al., 2012; Stockwell, Zhao, et al., 2012; Stockwell et al., 2013; Zhao et al., 2013)

– LMIC: 3 ((Russia, Poland) (Bhattacharya et al., 2013; Treisman, 2010; Wald & Moskalewicz, 1984)

**Scott S, Muirhead C, Shucksmith J, Tyrrell R, Kaner E. Does Industry-Driven Alcohol Marketing Influence Adolescent Drinking Behaviour? A Systematic Review. *Alcohol Alcohol* 2017; 52(1): 84-94.**

Number of studies:

– High-income: 2 (Saffer & Dave, 2006; van Hoof et al., 2008)

– LMIC: 0

**Nelson JP. Meta-analysis of alcohol price and income elasticities - with corrections for publication bias. *Health Econ Rev* 2013; 3(1): 17.**

Number of studies:

– High-income: 165 (Adrian & Ferguson, 1987; Alley et al., 1992; Andrienko & Nemtsov, 2005; Andrikopoulos et al., 1997; Andrikopoulos & Loizides, 2000; Angulo et al., 2001; Arranz & Gil, 2009; Ashton & Casswell, 1987; Asplund et al., 2007; Baltagi & Geishecker, 2006; Baltagi & Goel, 1990; Baltagi & Griffin, 1995, 2002, 2006; Baltagi & Li, 2006; Barnes, 1984; Barsby & Marshall, 1977; Bask & Melkersson, 2004; Bentzen et al., 1997; Berggren, 1997, 1997; Blake & Nied, 1997; Calfee & Scheraga, 1994; Chaloupka & Wechsler, 1996; Chang et al., 2002; Chetty et al., 2009; Clements et al., 1985; Clements & Johnson, 1983; Clements & Selvanathan, 1988; Clements & Selvanathan, 1991; Clements et al., 1997; Collis et al., 2010;

Comanor & Wilson, 1974; Crawford et al., 1999; Crawford & Tanner, 1995; Crooks, 1989; Dahlström & Åsberg, 2009; Decker & Schwartz, 2000; Duffy, 1982, 1982, 1983, 1990, 1991, 1995, 2001, 2003, 2003; Dyack & Goddard, 2001; Eakins & Gallagher, 2003; Edward et al., 2001; Fanelli & Mazzocchi, 2008; Florkowski & McNamara, 1992; Fung, 2011; Gallet, 1999; Gallet & Eastman, 2007; Gallet & List, 1998; Gao et al., 1995; Godfrey, 1988; Goel & Morey, 1995; Goldschmidt, 1990; Grabowski, 1976; Gruber et al., 2003; Gruenewald et al., 2006; Hagan & Waterson, 1983; Heien & Pompelli, 1989; Heien & Sims, 2000; Hogarty & Elzinga, 1972; Holm, 1995; Holm & Suoniemi, 1992; Hsieh et al., 2001; Huang, 2003; Janda et al., 2010; Jithitikulchai, 2010; John, 2005; Johnson & Oksanen, 1974, 1977; Johnson et al., 1992; Johnson, 1985; Jones, 1989; Keane, 1965; Kochanowski & Heck, 1987; Koksal, 2012; Kong, 2003; Labys, 1976; Larivière et al., 2000; Lau, 1975; Lee & Tremblay, 1992; Lee, 2007; Lee, Chen, Hwang, et al., 2010; Lee, Chen, Liu, et al., 2010; Leong & Wang, 1994; Leppänen et al., 2001; Leskinen & Teräsvirta, 1976; Levi & Folwell, 1995; Levy & Sheflin, 1983; Madden, 1992; Mangeloja & Pehkonen, 2009; Manning et al., 1995; McCarthy, 1977; McCornac & Filante, 1984; McGuinness, 1980, 1983; Menon et al., 2012; Meyerhoefer et al., 2005; Moosa & Baxter, 2002; Nelson, 1990, 1997, 1999, 2003, 2010; Nelson & Moran, 1995; Nelson & Young, 2001; Niskanen, 1960; Norman, 1975; Norström, 2005; Ogwang & Cho, 2009; Ornstein & Hanssens, 1985; Pagoulatos & Sorensen, 1986; Pearce, 1985; Penm, 1988; Pierani & Tiezzi, 2009, 2011; Quek, 1988; Ruhm et al., 2012; Sabuhoro et al., 1997; Saffer & Dave, 2002; Salisu & Balasubramanyam, 1997; Sam & Thompson, 2012; Schweitzer et al., 1983; Seale Jr et al., 2003; Selvanathan & Selvanathan, 2004; Selvanathan, 1988, 1989, 1991, 1995; Selvanathan, 2006; Selvanathan & Selvanathan, 2005; Selvanathan & Selvanathan, 2005, 2007; Shi, 2011; Smith, 1976; Stone & Rowe, 1958; Swidler, 1986; Taube et al., 1990; Taube & MacDonald, 1991; Tegene, 1990; Thom, 1984; Tiezzi & Pierani, 2007; Tiffin et al., 2011; Trolldal & Ponicki, 2005; Uri, 1986; Volland, 2012; Walsh, 1982; Wang et al., 1996; West & Parry, 2009; Wette et al., 1993; Wilkinson, 1987; Wilkinson, 1987; Wohlgenant, 2011; Yen, 1993; Yu & Chen, 1998; Yu & Abler, 2010; Zereyesus, 2010; Zhang & Casswell, 1999; Zhuk, 2011)

– LMIC: 16 (Andrienko & Nemtsov, 2005; Baltagi & Geishecker, 2006; Florkowski & McNamara, 1992; Györfi, 2006; John, 2005; Meyerhoefer et al., 2005; Osoro et al., 2001; Özgüven, 2004; Pan & Fang, 2003; Pan et al., 2006; Partanen, 1991; Shi, 2011; Tian & Liu, 2011; Treisman, 2010; Troncoso-Valverde, 2004; Wang et al., 1997)

**Nelson JP. Robust Demand Elasticities for Wine and Distilled Spirits: Meta-Analysis with Corrections for Outliers and Publication Bias. *Journal of Wine Economics* 2013; 8(3): 294-317**

Number of studies:

– High-income: 118 (Adrian & Ferguson, 1987; Alley et al., 1992; Andrikopoulos et al., 1997; Andrikopoulos & Loizides, 2000; Angulo et al., 2001; Ashton & Casswell, 1987; Asplund et al., 2007; Baltagi & Goel, 1990; Baltagi & Griffin, 1995, 2002, 2006; Baltagi & Li, 2006; Barnes, 1984; Barsby & Marshall, 1977; Bentzen et al., 1997; Berggren, 1997, 1997; Blake & Nied, 1997; Chang et al., 2002; Clements & Daryal, 2005; Clements & Johnson, 1983; Clements & Selvanathan, 1988; Clements & Selvanathan, 1991; Clements et al., 1997; Collis et al., 2010; Comanor & Wilson, 1974; Crawford et al., 1999; Crawford & Tanner, 1995; Crooks, 1989; Dahlström & Åsberg, 2009; Duffy, 1982, 1982, 1983, 1990, 1991, 1995, 2001, 2003, 2003; Dyack & Goddard, 2001; Eakins & Gallagher, 2003; Edward et al., 2001; Florkowski & McNamara, 1992; Gallet, 1999; Gallet & Eastman, 2007; Gao et al., 1995; Godfrey, 1988; Goel & Morey, 1995; Goldschmidt, 1990; Gruenewald et al., 2006; Hagan & Waterson, 1983; Heien & Pompelli, 1989; Heien & Sims, 2000; Holm, 1995; Holm & Suoniemi, 1992; Huang, 2003; Jithitikulchai, 2010; Johnson & Oksanen, 1974, 1977; Johnson et al., 1992; Johnson, 1985; Jones, 1989; Kochanowski & Heck, 1987; Kong, 2003; Labys, 1976; Larivière et al., 2000; Lau, 1975; Leong & Wang, 1994; Levi & Folwell, 1995; Mangeloja & Pehkonen, 2009; McCornac & Filante, 1984; McGuinness, 1983; Meyerhoefer et al., 2005; Moosa & Baxter, 2002; Nelson, 1990, 1990, 1997, 1999, 2003; Nelson & Moran, 1995; Niskanen, 1960; Norström, 2005; Ogwang & Cho, 2009; Ornstein & Hanssens, 1985; Owen, 1979; Pearce, 1985; Pierani & Tiezzi, 2011; Quek, 1988; Sabuhoro et al., 1997; Salisu & Balasubramanyam, 1997; Sam & Thompson, 2012; Schweitzer et al.,



1983; Seale Jr et al., 2003; Selvanathan & Selvanathan, 2004; Selvanathan, 1988, 1989, 1991, 1995; Selvanathan & Selvanathan, 2005; Selvanathan & Selvanathan, 2005, 2007; Smith, 1976; Swidler, 1986; Tegene, 1990; Thom, 1984; Thompson & Sam, 2008; Tiezzi & Pierani, 2007; Treisman, 2010; Trolldal & Ponicki, 2005; Troncoso-Valverde, 2004; Uri, 1986; Walsh, 1982; Wang et al., 1996; Wette et al., 1993; Wohlgenant, 2011; Yu & Chen, 1998; Zereyesus, 2010; Zhang & Casswell, 1999)  
– LMIC: 7 (Florkowski & McNamara, 1992; John, 2005; Özgüven, 2004; Pan & Fang, 2003; Partanen, 1991; Troncoso-Valverde, 2004; Wang et al., 1997)

**Nelson JP. Estimating the price elasticity of beer: meta-analysis of data with heterogeneity, dependence, and publication bias. *J Health Econ* 2014; 33: 180-7.**

Number of studies:

- High-income: 114 (list of studies not reported)
- LMIC: unclear

**Nelson JP. Does Heavy Drinking by Adults Respond to Higher Alcohol Prices and Taxes? A Survey and Assessment. *Economic Analysis and Policy* 2013; 43(3): 265-91.**

Number of studies:

- High-income: 18 (An & Sturm, 2011; Auld, 2005; Ayyagari et al., 2013; Byrnes et al., 2013; Dave & Saffer, 2008; Dee, 1999; Farrell et al., 2003; Gius, 2002; Hamilton & Hamilton, 1997; Harris et al., 2006; Heeb et al., 2003; Kenkel, 1996; Manning et al., 1995; McLellan, 2011; Nelson, 2008; Rhoads, 2010; Sloan et al., 1995; Stout et al., 2000)
- LMIC: 1 (China) (Shi, 2011)

**Nelson JP. Gender differences in alcohol demand: a systematic review of the role of prices and taxes. *Health Econ* 2014; 23(10): 1260-80.**

Number of studies:

- High-income: 16 (Auld, 2005; Chaloupka & Wechsler, 1996; Cook & Moore, 2001; Decker & Schwartz, 2000; Dee, 1999; French & Maclean, 2006; Hamilton & Hamilton, 1997; Keng & Huffman, 2007; Kenkel, 1993, 1996; Picone et al., 2004; Pierani & Tiezzi, 2011; Sutton & Godfrey, 1995; West & Parry, 2009; Williams et al., 2005; Zhang, 2010)
- LMIC: 5 (Andrienko & Nemtsov, 2005; Baltagi & Geishecker, 2006; Belanciu, 2006; Shi, 2011; Tian & Liu, 2011)

**Nelson JP. Binge drinking and alcohol prices: a systematic review of age-related results from econometric studies, natural experiments and field studies. *Health Econ Rev* 2015; 5: 6.**

Number of studies:

- High-income: 65 (Asgeirsdottir et al., 2012; Ayyagari et al., 2013; Bhatt, 2011; Bray, 2000, 2005; Byrnes et al., 2013; Carpenter et al., 2007; Chaloupka & Laixuthai, 1997; Chaloupka & Wechsler, 1996; Chatterji, 2001; Chung et al., 2013; Clapp et al., 2003; Cook, 2007; Cook & Moore, 1994, 2001; Cowan, 2011; Cowell, 2006; Davalos et al., 2012; Dee, 1999, 1999, 1999; Dee & Evans, 2003; French & Maclean, 2006; Gius, 2002, 2003; Gmel et al., 2008; Grossman, 2005; Grossman et al., 1987; Gustafsson, 2010; Heeb et al., 2003; Helakorpi et al., 2010; Jamison & Myers, 2008; Keng, 1998; Keng & Huffman, 2007; Kenkel, 1993, 1996; Laixuthai & Chaloupka, 1993; Ludbrook et al., 2012; Manning et al., 1995; Markowitz, 2001; McLellan, 2011; Medina, 2011; Nair et al., 2001; Nelson, 2008; O'Mara et al., 2009; Popovici & French, 2013; Powell et al., 2002; Renna, 2007; Rhoads, 2010; Saffer & Dave, 2006; Sloan et al., 1995; Stockwell et al., 1993; Stout et al., 2000; Sutton & Godfrey, 1995; Terza, 2002; Thombs et al., 2008; Thombs et al., 2009; Wagoner et al., 2012; Wechsler et al., 2000; Weitzman et al., 2003; Williams et al., 2005; Wolaver et al., 2007; Wolaver, 2007; Xuan et al., 2013; Zhang, 2010)

– LMIC: 0

**Nelson JP, McNall AD. What happens to drinking when alcohol policy changes? A review of five natural experiments for alcohol taxes, prices, and availability. Eur J Health Econ 2017; 18(4): 417-34.**

Number of studies:

– High-income: 29 (Allamani et al., 2014; Allamani et al., 2013; Andersen et al., 2014; Chung et al., 2013; Gmel et al., 2008; Grittner et al., 2011; Grittner et al., 2009; Gustafsson, 2010; Hallgren et al., 2012; Heeb et al., 2003; Helakorpi et al., 2010; Kim et al., 2013; Kuo, Heeb, et al., 2003; Lintonen et al., 2013; Makela et al., 2008; Makela & Osterberg, 2009; Mohler-Kuo et al., 2004; Mustonen et al., 2007; Norstrom & Svensson, 2014; Ramstedt, 2010; Raninen et al., 2013; Raninen et al., 2014; Ripatti & Makela, 2008; Room et al., 2013; Rossow et al., 2014; Stafström, 2007; Stafstrom & Ostergren, 2014; Svensson, 2012; Svensson & Landberg, 2013)

– LMIC: 0

## References

- Adams, Michael, and Tobias Effertz. 2010. Effective prevention against risky underage drinking--the need for higher excise taxes on alcoholic beverages in Germany. *Alcohol Alcohol* 45 (4):387-94.
- Adrian, Manuella, and Brian S Ferguson. 1987. Demand for Domestic and Imported Alcohol in Canada. *Applied Economics* 19 (4):531-540.
- Ahtola, Juha, Anders Ekholm, and Antti Somervuori. 1986. Bayes Estimates for the Price and Income Elasticities of Alcoholic Beverages in Finland From 1955 to 1980. *Journal of Business & Economic Statistics* 4 (2):199-208.
- Allamani, A, F Voller, P Pepe, M Baccini, G Massini, G Maurelli, M Buscema, P Anderson, E Österberg, and E Karlsson. 2013. Balance of power in alcohol policy: Balance across different groups and as a whole between societal changes and alcohol policies. In *Alcohol policy in Europe: Evidence from AMPHORA, 2nd edition*, edited by P. Anderson, F. Braddick, J. Reynolds and A. Gual.
- Allamani, Allaman, Nadia Olimpi, Pasquale Pepe, and Francesco Cipriani. 2014. Trends in consumption of alcoholic beverages and policy interventions in Europe: an uncertainty "associated" perspective. *Subst Use Misuse* 49 (12):1531-45.
- Alley, Andrew G, Donald G Ferguson, and Kenneth G Stewart. 1992. An almost ideal demand system for alcoholic beverages in British Columbia. *Empirical Economics* 17 (3):401-418.
- An, Ruopeng, and Roland Sturm. 2011. Does the response to alcohol taxes differ across racial/ethnic groups? Some evidence from 1984-2009 Behavioral Risk Factor Surveillance System. *The Journal of Mental Health Policy and Economics* 14 (1):13-23.
- Andersen, Anette, Mette Rasmussen, Pernille Bendtsen, Pernille Due, and Bjørn E Holstein. 2014. Secular Trends in Alcohol Drinking Among Danish 15-Year-Olds: Comparable Representative Samples From 1988 to 2010. *Journal of Research on Adolescence* 24 (4):748-756.
- Anderson, Peter, Dan Chisholm, and Daniela C Fuhr. 2009. Effectiveness and cost-effectiveness of policies and programmes to reduce the harm caused by alcohol. *The Lancet* 373 (9682):2234-2246.
- Andreasson, Sven, Harold D. Holder, Thor Norström, Esa Österberg, and Ingeborg Rossow. 2006. Estimates of harm associated with changes in Swedish alcohol policy: results from past and present estimates. *Addiction* 101 (8):1096-1105.
- Andrienko, Yurii, and Aleksandr Nemtsov. 2005. Estimation of individual demand for alcohol. EERC Working Paper Series No 05/10. Moscow: Economics Education and Research Consortium.
- Andrikopoulos, Andreas A, James A Brox, and Emanuel Carvalho. 1997. The demand for domestic and imported alcoholic beverages in Ontario, Canada: a dynamic simultaneous equation approach. *Applied Economics* 29 (7):945-953.

- Andrikopoulos, Andreas A, and John Loizides. 2000. The demand for home-produced and imported alcoholic beverages in Cyprus: the AIDS approach. *Applied Economics* 32 (9):1111-1119.
- Angulo, Ana Maria, Jose Maria Gil, and Azucena Gracia. 2001. The demand for alcoholic beverages in Spain. *Agricultural Economics* 26 (1):71-83.
- Arranz, José M, and Ana I Gil. 2009. Traffic accidents, deaths and alcohol consumption. *Applied Economics* 41 (20):2583-2595.
- Asgeirsdottir, Tinna Laufey, Hope Corman, Kelly Noonan, Þórhildur Ólafsdóttir, and Nancy E Reichman. 2012. Are Recessions Good for Your Health Behaviors? Impacts of the Economic Crisis in Iceland. NBER Working Paper No. 18233. Cambridge, MA: National Bureau of Economic Research.
- Ashton, Toni, and Sally Casswell. 1987. Alcohol taxation as a public health policy: the New Zealand experience. *Community health studies* 11 (2):108-119.
- Asplund, Marcus, Richard Friberg, and Fredrik Wilander. 2007. Demand and distance: Evidence on cross-border shopping. *Journal of Public Economics* 91 (1-2):141-157.
- Atkinson, Anthony Barnes, Joanna Gomulka, and Nicholas Herbert Stern. 1990. Spending on Alcohol: Evidence from the Family Expenditure Survey 1970-1983. *The Economic Journal* 100 (402):808-827.
- Auld, M Christopher. 2005. Smoking, Drinking, and Income. *Journal of Human Resources* 40 (2):505-518.
- Ayyagari, Padmaja, Partha Deb, Jason Fletcher, William Gallo, and Jody L Sindelar. 2013. Understanding heterogeneity in price elasticities in the demand for alcohol for older individuals. *Health Economics* 22 (1):89-105.
- Babor, Thomas F, Jack H Mendelson, Isaac Greenberg, and John Kuehnle. 1978. Experimental analysis of the 'happy hour': Effects of purchase price on alcohol consumption. *Psychopharmacology* 58 (1):35-41.
- Baker, Paul, and Stephen McKay. 1990. The structure of alcohol taxes: a hangover from the past? London, UK: Institute for Fiscal Studies.
- Baltagi, Badi H, and Ingo Geishecker. 2006. Rational alcohol addiction: evidence from the Russian longitudinal monitoring survey. *Health Economics* 15 (9):893-914.
- Baltagi, Badi H, and Rajeev K Goel. 1990. Quasi-Experimental Price Elasticity of Liquor Demand in the United States: 1960-83. *American Journal of Agricultural Economics* 72 (2):451-454.
- Baltagi, Badi H, and James M Griffin. 1995. A Dynamic Demand Model for Liquor: The Case for Pooling. *The Review of Economics and Statistics* 77 (3):545-554.
- . 2002. Rational addiction to alcohol: panel data analysis of liquor consumption. *Health Economics* 11 (6):485-491.
- . 2006. Swedish liquor consumption: new evidence on taste change. In *Contributions to Economic Analysis*, edited by B. H. Baltagi: Elsevier.
- Baltagi, Badi H, and Dong Li. 2006. Prediction in the Panel Data Model with Spatial Correlation: the Case of Liquor. *Spatial Economic Analysis* 1 (2):175-185.
- Barnes, James G. 1984. Per capita consumption of alcohol: An examination of the relative importance of advertising and other factors. St. John's: Memorial University of Newfoundland.
- Barsby, Steve L, and Gary L Marshall. 1977. Short-term consumption effects of a lower minimum alcohol-purchasing age. *Journal of Studies on Alcohol* 38 (9):1665-1679.
- Bask, Mikael, and Maria Melkersson. 2004. Rationally addicted to drinking and smoking? *Applied Economics* 36 (4):373-381.
- Beard, T. Randolph, Paula A Gant, and Richard P Saba. 1997. Border-Crossing Sales, Tax Avoidance, and State Tax Policies: An Application to Alcohol. *Southern Economic Journal* 64 (1):293-306.
- Belanciu, Ana. 2006. Estimation of individual demand for alcohol: evidence from Ukraine. Master of Arts, Economics. Kyiv: National University of Kyiv-Mohyla Academy.
- Bentzen, Jan, Tor Eriksson, and Valdemar Smith. 1999. Rational addiction and alcohol consumption: evidence from the Nordic countries. *Journal of Consumer Policy* 22 (3):257-279.

- Bentzen, Jan, Valdemar Smith, and Niels Nannerup. 1997. Alcohol consumption and drunken driving in the Scandinavian countries. . Aarhus, Denmark: Aarhus School of Business, Department of Economics.
- Berggren, Fredrik. 1997. The demand for alcohol in Sweden 1985-1995: A system approach. Lund Economic Studies number 71. In *Essays on the demand for alcohol in Sweden: Review and applied demand studies*, edited by F. Berggren. Lund: Lund University.
- . 1997. Swedes and alcohol: An empirical analysis of rational addiction models. In *Essays on the demand for alcohol in Sweden: Review and applied demand studies*, edited by F. Berggren. Lund: Lund University.
- Bhatt, Vipul. 2011. Adolescent Alcohol Use and Intergenerational Transfers: Evidence from Micro Data. *Journal of Family and Economic Issues* 32 (2):296-307.
- Bhattacharya, Jay, Christina Gathmann, and Grant Miller. 2013. The Gorbachev anti-alcohol campaign and Russia's mortality crisis. *American Economic Journal: Applied Economics* 5 (2):232-60.
- Bielińska-Kwapisz, Agnieszka, and Douglas J Young. 2001. Alcohol Consumption, Beverage Prices and Measurement Error. Bozeman, MT: Department of Agricultural Economics and Economics, Montana State University.
- Bishai, David M, Dan Mercer, and Athena Tapales. 2005. Can government policies help adolescents avoid risky behavior? *Preventive medicine* 40 (2):197-202.
- Bishop, John A, Haiyong Liu, and Qi Meng. 2007. Are Chinese smokers sensitive to price? *China Economic Review* 18 (2):113-121.
- Black, Heather, Jan Gill, and Jonathan Chick. 2011. The price of a drink: levels of consumption and price paid per unit of alcohol by Edinburgh's ill drinkers with a comparison to wider alcohol sales in Scotland. *Addiction* 106 (4):729-736.
- Blake, David, and Angelika Nied. 1997. The demand for alcohol in the United Kingdom. *Applied Economics* 29 (12):1655-1672.
- Blaylock, J R, and W N Blisard. 1993. Wine consumption by US men. *Applied Economics* 25 (5):645-651.
- Blaylock, James R, and W. sN Blisard. 1993. Women and the Demand for Alcohol: Estimating Participation and Consumption. *Journal of Consumer Affairs* 27 (2):319-334.
- Boniface, Sadie, Jack W Scannell, and Sally Marlow. 2017. Evidence for the effectiveness of minimum pricing of alcohol: a systematic review and assessment using the Bradford Hill criteria for causality. *BMJ Open* 7 (5):e013497.
- Booth, Andrew, Alan Brennan, Petra Meier, Daragh O'Reilly, Robin Purshouse, Tim Stockwell, Anthea Sutton, Karl Taylor, Anna Wilkinson, and Ruth Wong. 2008. Independent review of the effects of alcohol pricing and promotion: part a – systematic reviews. Sheffield: School of Health and Related Research, University of Sheffield.
- Bourgeois, Jacques C, and James G Barnes. 1979. Does advertising increase alcohol consumption? *Journal of Advertising Research* 19 (4):19-29.
- Bray, Jeremy W. 2000. Identifying Inputs to the Human Capital Production Function: the Effects of Alcohol Use on Human Capital Formation, Department of Economics, The University of North Carolina at Chapel Hill, Chapel Hill, NC.
- . 2005. Alcohol Use, Human Capital, and Wages. *Journal of Labor Economics* 23 (2):279-312.
- Brinkley, Garland L. 1999. The causal relationship between socioeconomic factors and alcohol consumption: a Granger-causality time series analysis, 1950-1993. *J Stud Alcohol* 60 (6):759-68.
- Bryding, G, and U Rosen. 1969. Konsumtionen av alkoholhaltiga drycker 1920-1951, en efterfrageanalytisk studie [Consumption of alcohol beverages in Sweden 1920-1951, an econometric study]. Uppsala: Universitetets Statistiska Institution (stencil).
- Buccola, Steven T, and Loren VanderZanden. 1997. Wine Demand, Price Strategy, and Tax Policy. *Applied Economic Perspectives and Policy* 19 (2):428-440.

- Bureau for Economic Research. 2010. Econometric Estimates of the Price and Income Elasticities of the Demand for Liquor in South Africa. Report prepared for the South African Liquor Brand owners Association (SALBA). Stellenbosch: Bureau for Economic Research, University of Stellenbosch.
- Byrnes, Joshua, Anthony Shakeshaft, Dennis Petrie, and Christopher Doran. 2013. Can harms associated with high-intensity drinking be reduced by increasing the price of alcohol? *Drug and alcohol review* 32 (1):27-30.
- Calfee, John E, and Carl Scheraga. 1994. The Influence of Advertising on Alcohol Consumption: A Literature Review and An Econometric Analysis of Four European Nations. *International Journal of Advertising* 13 (4):287-310.
- Callinan, Sarah, Robin Room, Michael Livingston, and Heng Jiang. 2015. Who Purchases Low-Cost Alcohol in Australia? *Alcohol and Alcoholism* 50 (6):647-653.
- Cameron, Lisa, and Jenny Williams. 2001. Cannabis, Alcohol and Cigarettes: Substitutes or Complements? *Economic Record* 77 (236):19-34.
- Carpenter, Christopher S., Deborah D. Kloska, Patrick O'Malley, and Lloyd Johnston. 2007. Alcohol Control Policies and Youth Alcohol Consumption: Evidence from 28 Years of Monitoring the Future. *The BE Journal of Economic Analysis & Policy* 7 (1).
- Chaloupka, Frank J, Michael Grossman, and Henry Saffer. 2002. The effects of price on alcohol consumption and alcohol-related problems. *Alcohol Res Health* 26 (1):22-34.
- Chaloupka, Frank J, and Adit Laixuthai. 1997. Do Youths Substitute Alcohol and Marijuana? Some Econometric Evidence. *Eastern Economic Journal* 23 (3):253-276.
- Chaloupka, Frank J, and Henry Wechsler. 1996. Binge drinking in college: The impact of price, availability, and alcohol control policies. *Contemporary Economic Policy* 14 (4):112-124.
- Chang, Hui-Shung, Garry Griffith, and Nicholas Bettington. 2002. The Demand for Wine in Australia Using a Systems Approach: Industry Implications. *Australasian Agribusiness Review* 10 (9):2-12.
- Chang, X, and A Li. 2006. A Study on Rural Residents' Food Consumption Demand in Jiangsu Province [in Chinese]. *Journal of Nanjing Agricultural University (Social Sciences Edition)* 6 (2):20-24.
- Chatterji, Pinka. 2001. What determines adolescent demand for alcohol and marijuana? A comparison of findings from the NLSY79 and the NLSY97. In *Social awakening: Adolescent behavior as adulthood approaches*, edited by R. T. Michael. New York, NY: Russell Sage Foundation.
- Chen, Meng-Jinn, Mallie J Paschall, and Joel W Grube. 2006. Motives for malt liquor consumption in a sample of community college students. *Addictive Behaviors* 31 (8):1295-1307.
- Chetty, Raj, Adam Looney, and Kory Kroft. 2009. Salience and Taxation: Theory and Evidence. *American Economic Review* 99 (4):1145-77.
- Chung, Vincent C H, Benjamin H K Yip, Sian M Griffiths, Ellen L M Yu, Jean H Kim, Wilson W S Tam, Alvin H C Wong, Iris W T Chan, and Joseph T F Lau. 2013. The impact of cutting alcohol duties on drinking patterns in Hong Kong. *Alcohol Alcohol* 48 (6):720-8.
- Clapp, John D, James Lange, Jon Wong Min, Audrey Shillington, Mark Johnson, and Robert Voas. 2003. Two studies examining environmental predictors of heavy drinking by college students. *Prev Sci* 4 (2):99-108.
- Clements, K W, and S Selvanathan. 1995. The Demand for Alcoholic Beverages. In *Recent Developments in Applied Demand Analysis: Alcohol, Advertising, and Global Consumption*, edited by S. Selvanathan and K. W. Clements. Berlin, Heidelberg: Springer.
- Clements, Kenneth, Paul B McLeod, and Eliyathamby Selvanathan. 1985. Does advertising affect drinking and smoking?: The University of Western Australia, Department of Economics.
- Clements, Kenneth W, and Lester W Johnson. 1983. The Demand for Beer, Wine, and Spirits: A Systemwide Analysis. *Journal of Business* 56 (3):273-304.
- Clements, Kenneth W, and Eliyathamby Antony Selvanathan. 1988. The Rotterdam Demand Model and its Application in Marketing. *Marketing Science* 7 (1):60-75.

- Clements, Kenneth W Selvanathan, Eliyathamby Antony. 1987. Alcohol Consumption. In *Applied Demand Analysis: Results from System-Wide Approaches*, edited by H. Thiel and K. W. Clements. Cambridge, MA: Ballinger Publishing Company.
- Clements, Kenneth W, and Saroja Selvanathan. 1991. The economic determinants of alcohol consumption. *Australian Journal of Agricultural Economics* 35 (2):209-231.
- Clements, Kenneth W, Wana Yang, and Simon W Zheng. 1997. Is utility additive? The case of alcohol. *Applied Economics* 29 (9):1163-1167.
- Clements, Kenneth W., and Mert Daryal. 2005. Exogenous shocks and related goods: drinking and the legalisation of marijuana. *Economics Letters* 89 (1):101-106.
- Coate, Douglas, and Michael Grossman. 1988. Effects of Alcoholic Beverage Prices and Legal Drinking Ages on Youth Alcohol Use. *The Journal of Law and Economics* 31 (1):145-171.
- Collis, James, Andrew Grayson, and Surjinder Johal. 2010. Econometric Analysis of Alcohol Consumption in the UK. HMRC Working Paper 10. In *London: HM Revenue & Customs*. London, UK: HM Revenue & Customs.
- Comanor, William S, and Thomas A Wilson. 1974. *Advertising and Market Power*. *Harvard Economic Studies* 144. Cambridge, MA: Harvard University Press.
- Commission des Communautés Européennes. 1972. Effets du prix et du revenu sur la consommation des boissons dans les Etats membres des Communautés. Collection Etudes No.19. Bruxelles: Commission des Communautés Européennes.
- Conrad, Klaus. 1989. Tests for Optimizing Behavior and for Patterns of Conjectural Variations. *Kyklos* 42 (2):231-255.
- Cook, Philip J. 1981. The Effect of Liquor Taxes on Drinking, Cirrhosis, and Auto Accidents. In *Alcohol and Public Policy: Beyond the Shadow of Prohibition*. *National Research Council (US) Panel on Alternative Policies Affecting the Prevention of Alcohol Abuse and Alcoholism*, edited by M. H. Moore and D. R. Gerstein. Washington, DC: National Academies Press (US).
- . 1982. Alcohol Taxes as a Public Health Measure. *British Journal of Addiction* 77 (3):245-250.
- . 2007. *Paying the Tab: The Costs and Benefits of Alcohol Control*. Princeton, NJ: Princeton University Press.
- Cook, Philip J, and Michael J Moore. 1993. Violence reduction through restrictions on alcohol availability. *Alcohol Research* 17 (2):151-156.
- . 1994. This tax's for you: The case for higher beer taxes. *National tax journal* 47 (3):559-573.
- . 2001. Environment and Persistence in Youthful Drinking Patterns. In *Risky Behavior among Youths: An Economic Analysis*, edited by J. Gruber. Chicago, IL: University of Chicago Press.
- Cook, Philip J, and George Tauchen. 1982. The Effect of Liquor Taxes on Heavy Drinking. *The Bell Journal of Economics*:379-390.
- Cousins, Gráinne, Deirdre Mongan, Joe Barry, Bobby Smyth, Marion Rackard, and Jean Long. 2016. Potential Impact of Minimum Unit Pricing for Alcohol in Ireland: Evidence from the National Alcohol Diary Survey. *Alcohol and Alcoholism* 51 (6):734-740.
- Cowan, Benjamin W. 2011. Forward-Thinking Teens: The Effects of College Costs on Adolescent Risky Behavior. *Econ Educ Rev* 30 (5):813-825.
- Cowell, Alexander J. 2006. The relationship between education and health behavior: some empirical evidence. *Health Economics* 15 (2):125-146.
- Crawford, Ian, Zoe Smith, and Sarah Tanner. 1999. Alcohol taxes, tax revenues and the Single European Market. *Fiscal Studies* 20 (3):287-304.
- Crawford, Ian, and Sarah Tanner. 1995. Bringing It All Back Home: Alcohol Taxation and Cross-Border Shopping. *Fiscal Studies* 16 (2):94-114.
- Crawford, Mike J, Alexander M H Parry, Adam R W Weston, Dionysis Seretis, Maria Zauter-Tutt, Abrar Hussain, Pardis Mostajabi, Rahil Sanatinia, and Bernard North. 2012. Relationship Between Price

- Paid for Off-Trade Alcohol, Alcohol Consumption and Income in England: A Cross-Sectional Survey. *Alcohol Alcohol* 47 (6):738-42.
- Crooks, Edmund. 1989. *Alcohol consumption and taxation*. London: Institute for Fiscal Studies.
- Dahlström, Tobias, and Erik Åsberg. 2009. Determinants of Demand for Wine – price sensitivity and perceived quality in a monopoly setting. CESIS Electronic Working Paper Series. Paper No. 182. Stockholm: Centre of Excellence for Science and Innovation Studies.
- Davalos, Maria E, Hai Fang, and Michael T French. 2012. Easing the pain of an economic downturn: macroeconomic conditions and excessive alcohol consumption. *Health Econ* 21 (11):1318-35.
- Dave, Dhaval, and Henry Saffer. 2008. Alcohol demand and risk preference. *Journal of Economic Psychology* 29 (6):810-831.
- Decker, Sandra, and Amy Ellen Schwartz. 2000. Cigarettes and Alcohol: Substitutes or Complements? NBER Working Paper No. 7535. Cambridge, MA: National Bureau of Economic Research
- Dee, Thomas S. 1999. The complementarity of teen smoking and drinking. *J Health Econ* 18 (6):769-93.
- . 1999. State alcohol policies, teen drinking and traffic fatalities. *Journal of Public Economics* 72 (2):289-315.
- . 1999. Taxes, alcohol use and traffic fatalities. Working Paper. Swarthmore, PA: Swarthmore College.
- Dee, Thomas S, and William N Evans. 2003. Teen Drinking and Educational Attainment: Evidence from Two-Sample Instrumental Variables Estimates. *Journal of Labor Economics* 21 (1):178-209.
- Dhalwani, Nafeesa. 2011. A Review of Alcohol Pricing and its Effects on Alcohol Consumption and Alcohol-Related Harm. *J Pak Med Stud* 1:23–27.
- DiNardo, John, and Thomas Lemieux. 2001. Alcohol, marijuana, and American youth: the unintended consequences of government regulation. *Journal of Health Economics* 20 (6):991-1010.
- Dong, G. 2009. Positive Analysis of Food Consumption of Rural Residents in West Areas [in Chinese]. *Journal of Anhui Agricultural Science* 37 (4):1815-1817.
- Dong, G, and W Lu. 2009. An AIDS Model Analysis on Food Demand of Chinese Residents: A Case of Urban Areas in the West [in Chinese]. *Statistics and Information Forum* 24 (9):76-80.
- Duffy, Martyn. 1981. The influence of prices, consumer incomes and advertising upon the demand for alcoholic drink in the United Kingdom: an econometric study. *Alcohol and Alcoholism* 16 (4):200-209.
- . 1982. A case study in econometric forecasting for alcoholic drinks. *Omega* 10 (6):597-611.
- . 1982. The Effect of Advertising on the Total Consumption of Alcoholic Drinks in the United Kingdom: Some Econometric Estimates. *International Journal of Advertising* 1 (2):105-117.
- . 1983. The demand for alcoholic drink in the United Kingdom, 1963–78. *Applied Economics* 15 (1):125-140.
- . 1990. Advertising and Alcoholic Drink Demand in the UK: Some Further Rotterdam Model Estimates. *International Journal of Advertising* 9 (3):247-257.
- . 1991. Advertising and the consumption of tobacco and alcoholic drink: a system-wide analysis. *Scottish Journal of Political Economy* 38 (4):369-385.
- . 1995. Advertising in demand systems for alcoholic drinks and tobacco: A comparative study. *Journal of Policy Modeling* 17 (6):557-577.
- . 2001. Advertising in consumer allocation models: choice of functional form. *Applied Economics* 33 (4):437-456.
- . 2003. Advertising and food, drink and tobacco consumption in the United Kingdom: a dynamic demand system. *Agricultural Economics* 28 (1):51-70.
- . 2003. On the estimation of an advertising-augmented, cointegrating demand system. *Economic Modelling* 20 (1):181-206.
- Duffy, Martyn H. 1987. Advertising and the inter-product distribution of demand: A Rotterdam model approach. *European Economic Review* 31 (5):1051-1070.

- Dyack, Brenda, and Ellen W Goddard. 2001. The Rise of Red and the Wane of White: Wine Demand in Ontario Canada. Paper read at AARES 2001, at Adelaide, South Australia.
- Eakins, John M, and Liam A Gallagher. 2003. Dynamic almost ideal demand systems: an empirical analysis of alcohol expenditure in Ireland. *Applied Economics* 35 (9):1025-1036.
- Edward, Coulson N, John R Moran, and Jon P Nelson. 2001. The long-run demand for alcoholic beverages and the advertising debate: A cointegration analysis. In *Advertising and Differentiated Products (Advances in Applied Microeconomics, Vol. 10)*, edited by M. R. Baye and J. P. Nelson. Bingley: Emerald Group Publishing Limited.
- . 2001. The long-run demand for alcoholic beverages and the advertising debate: A cointegration analysis. In *Advertising and Differentiated Products*, edited by M. R. Baye and J. P. Nelson. Bingley: Emerald Group Publishing Limited.
- Eecen, A M D. 1985. De vraag naar bier en gedistilleerd. Een berekening van de elasticiteiten over de periode 1960–1983 [The Demand of Beer and Distilled Beverages: An Analysis of Price-Elasticities 1960-1983]. Amsterdam: Stichting Wetenschappelijk Onderzoek Alcohol en Drugs (SWOAD).
- . 1985. Prijs-en inkomenselasticiteiten van alcoholhoudende dranken in Nederland [Price and income elasticities of alcoholic beverages in the Netherlands]. Amsterdam: Stichting Wetenschappelijk Onderzoek Alcohol en Drugs (SWOAD).
- Elder, Randy W, Briana Lawrence, Aneeqah Ferguson, Timothy S Naimi, Robert D Brewer, Sajal K Chattopadhyay, Traci L Toomey, and Jonathan E Fielding. 2010. The effectiveness of tax policy interventions for reducing excessive alcohol consumption and related harms. *Am J Prev Med* 38 (2):217-29.
- Elzinga, Kenneth G, and Thomas F Hogarty. 1973. The Problem of Geographic Market Delineation in Antimerger Suits. *The Antitrust Bulletin* 18 (1):45-81.
- Falkner, Carolyn, Grant Christie, Lifeng Zhou, and Julian King. 2015. The effect of alcohol price on dependent drinkers' alcohol consumption. *N Z Med J* 128 (1427):9-17.
- Fan, Shenggen, Gail Cramer, and Eric Wailes. 1994. Food demand in rural China: evidence from rural household survey. *Agricultural Economics* 11 (1):61-69.
- Fan, Shenggen, Eric J. Wailes, and Gail L. Cramer. 1995. Household Demand in Rural China: A Two-Stage LES-AIDS Model. *American Journal of Agricultural Economics* 77 (1):54-62.
- Fanelli, Luca, and Mario Mazzocchi. 2008. Rational Addiction, Cointegration and Tobacco and Alcohol Demand. Serie Ricerche 2008, n.1. Bologna: Dipartimento di Scienze Statistiche "Paolo Fortunati" Università degli studi di Bologna.
- Farrell, Susan, Willard G Manning, and Michael D Finch. 2003. Alcohol dependence and the price of alcoholic beverages. *J Health Econ* 22 (1):117-47.
- Florkowski, Wojciech J, and Kevin T McNamara. 1992. Policy implications of alcohol and tobacco demand in Poland. *Journal of Policy Modeling* 14 (1):93-98.
- Fogarty, James. 2006. The nature of the demand for alcohol: understanding elasticity. *British Food Journal* 108 (4):316-332.
- . 2010. The demand for beer, wine and spirits: a survey of the literature. *Journal of Economic Surveys* 24 (3):428-478.
- Forsyth, Alasdair J M, Anne Ellaway, and Neil Davidson. 2014. How Might the Alcohol Minimum Unit Pricing (MUP) Impact upon Local Off-Sales Shops and the Communities Which They Serve? *Alcohol and Alcoholism* 49 (1):96-102.
- Franke, George, and Gary Wilcox. 1987. Alcoholic Beverage Advertising and Consumption in the United States, 1964–1984. *Journal of Advertising* 16 (3):22-30.
- Freeman, Donald G. 1999. A note on 'Economic conditions and alcohol problems'. *Journal of Health Economics* 18 (5):661-670.
- . 2000. Alternative Panel Estimates of Alcohol Demand, Taxation, and the Business Cycle. *Southern Economic Journal* 67 (2):325-344.



- French, Michael T, and Johanna C Maclean. 2006. Underage alcohol use, delinquency, and criminal activity. *Health Economics* 15 (12):1261-1281.
- French, Michael Thomas, Didra Brown Taylor, and Ricky Neville Bluthenthal. 2006. Price elasticity of demand for malt liquor beer: Findings from a US pilot study. *Social Science & Medicine* 62 (9):2101-2111.
- Fung, Justin C. 2011. The International Nature of Alcohol as Determined by a Cross-Country Analysis of Demographs and Pricing, 1995-2002. *Undergraduate Economic Review* 7 (1):16.
- Gallet, Craig A. 1999. Gradual switching regression estimates of alcohol demand elasticities. *Applied Economics Letters* 6 (6):377-379.
- . 2007. The demand for alcohol: a meta-analysis of elasticities. *Australian Journal of Agricultural and Resource Economics* 51 (2):121-135.
- Gallet, Craig A, and Hyrum S Eastman. 2007. The impact of smoking bans on alcohol demand. *The Social Science Journal* 44 (4):664-676.
- Gallet, Craig A, and John A List. 1998. Elasticities of beer demand revisited. *Economics Letters* 61 (1):67-71.
- Gao, XM, Eric J Wailes, and Gail L Cramer. 1995. A microeconomic model analysis of US consumer demand for alcoholic beverages. *Applied Economics* 27 (1):59-69.
- Gius, Mark Paul. 2002. The effect of taxes on alcohol consumption: an individual level analysis with a correction for aggregate public policy variables. *Penn Econ Rev* 11 (1):76-93.
- . 2003. Using Nlsy-Geocode Data To Determine The Effects Of Taxes And Minimum Age Laws On The Alcoholic Beverage Demand Of Young Adults. *New York Economic Review* 34 (1):38-50.
- . 2005. An estimate of the effects of age, taxes, and other socioeconomic variables on the alcoholic beverage demand of young adults. *The Social Science Journal* 42 (1):13-24.
- Gmel, Gerhard, Matthias Wicki, Jurgen Rehm, and Jean-Luc Heeb. 2008. Estimating regression to the mean and true effects of an intervention in a four-wave panel study. *Addiction* 103 (1):32-41.
- Godfrey, Christine. 1988. Licensing and the demand for alcohol. *Applied economics* 20 (11):1541-1558.
- Goel, Rajeev K, and Mathew J Morey. 1995. The Interdependence of Cigarette and Liquor Demand. *Southern Economic Journal* 62 (2):451-459.
- Goldschmidt, Peter S. 1990. Economic Aspects of Alcohol Consumption in Australia: Part 1. Discussion Paper 90.16. Perth: Department of Accounting and Finance, The University of Western Australia.
- Grabowski, Henry G. 1976. The Effects of Advertising on the Interindustry Distribution of Demand. In *Explorations in Economic Research, Volume 3, number 1*: National Bureau of Economic Research.
- Grittner, Ulrike, Gerhard Gmel, Samuli Ripatti, Kim Bloomfield, and Matthias Wicki. 2011. Missing value imputation in longitudinal measures of alcohol consumption. *Int J Methods Psychiatr Res* 20 (1):50-61.
- Grittner, Ulrike, Nina-Katri Gustafsson, and Kim Bloomfield. 2009. Changes in alcohol consumption in Denmark after the tax reduction on spirits. *Eur Addict Res* 15 (4):216-23.
- Grossman, Michael. 2005. Individual behaviours and substance use: the role of price. In *Substance Use: Individual Behaviour, Social Interactions, Markets and Politics (Advances in Health Economics and Health Services Research, Vol. 16)*, edited by B. Lindgren and M. Grossman. Bingley: Emerald Group Publishing Limited.
- Grossman, Michael, Frank J Chaloupka, and Ismail Sirtalan. 1998. An empirical analysis of alcohol addiction: results from the monitoring the future panels. *Economic Inquiry* 36 (1):39-48.
- Grossman, Michael, Douglas Coate, and Gregory M Arluck. 1987. Price sensitivity of alcoholic beverages in the United States: Youth alcohol consumption. In *Control issues in alcohol abuse prevention: Strategies for states and communities*, edited by M. H. Moore and D. R. Gerstein. Greenwich, CT: JAI Press.
- Grossman, Michael, and Sara Markowitz. 1999. Alcohol Regulation and Violence on College Campuses. NBER Working Paper No. 7129. Cambridge, MA: National Bureau of Economic Research.

- Gruber, Jonathan, Anindya Sen, and Mark Stabile. 2003. Estimating price elasticities when there is smuggling: the sensitivity of smoking to price in Canada. *Journal of Health Economics* 22 (5):821-842.
- Gruenewald, Paul J, Pat Madden, and Kathy Janes. 1992. Alcohol Availability and the Formal Power and Resources of State Alcohol Beverage Control Agencies. *Alcoholism: Clinical and Experimental Research* 16 (3):591-597.
- Gruenewald, Paul J, William R Ponicki, Harold D Holder, and Anders Romelsjö. 2006. Alcohol Prices, Beverage Quality, and the Demand for Alcohol: Quality Substitutions and Price Elasticities. *Alcoholism: Clinical and Experimental Research* 30 (1):96-105.
- Gustafsson, Nina-Katri J. 2010. Alcohol consumption in southern Sweden after major decreases in Danish spirits taxes and increases in Swedish travellers' quotas. *Eur Addict Res* 16 (3):152-61.
- Györfi, Zoltán. 2006. Transformation of the Hungarian beer market in the light of international tendencies. Ph.D. thesis. Budapest: Corvinus University of Budapest.
- H.M. Treasury. 1980. The change in revenue from an indirect tax change. *Economic Trends* 317:97-107.
- Hagan, L. W., and M. J. Waterson. 1983. *The Impact of Advertising on the United Kingdom Alcoholic Drink Market*. London: Advertising Association.
- Hallgren, Mats, Hakan Leifman, and Sven Andreasson. 2012. Drinking less but greater harm: could polarized drinking habits explain the divergence between alcohol consumption and harms among youth? *Alcohol Alcohol* 47 (5):581-90.
- Hamilton, Vivian, and Barton H Hamilton. 1997. Alcohol and Earnings: Does Drinking Yield a Wage Premium? *Canadian Journal of Economics* 30 (1):135-151.
- Harris, Mark N, Preety Ramful, and Xueyan Y Zhao. 2006. An ordered generalised extreme value model with application to alcohol consumption in Australia. *Journal of Health Economics* 25 (4):782-801.
- Hausman, Jerry, Gregory Leonard, and J Douglas Zona. 1994. Competitive Analysis with Differentiated Products. *Annales d'Economie et de Statistique* 34:159-180.
- Heeb, Jean-Luc, Gerhard Gmel, Christoph Zurbrugg, Meichun Kuo, and Jurgen Rehm. 2003. Changes in alcohol consumption following a reduction in the price of spirits: a natural experiment in Switzerland. *Addiction* 98 (10):1433-46.
- Heien, Dale, and Greg Pompelli. 1989. The Demand for Alcoholic Beverages: Economic and Demographic Effects. *Southern Economic Journal* 55 (3):759-770.
- Heien, Dale, and Eric N Sims. 2000. The Impact of the Canada-United States Free Trade Agreement on US Wine Exports. *American Journal of Agricultural Economics* 82 (1):173-182.
- Helakorpi, Satu, Pia Mäkelä, and Antti Uutela. 2010. Alcohol consumption before and after a significant reduction of alcohol prices in 2004 in Finland: were the effects different across population subgroups? *Alcohol & Alcoholism* 45 (3):286-292.
- Henderson, Claire, Xinhua Liu, Ana V. Diez Roux, Bruce G Link, and Deborah Hasin. 2004. The effects of US state income inequality and alcohol policies on symptoms of depression and alcohol dependence. *Social science & medicine* 58 (3):565-575.
- Herttua, Kimmo, Pia Mäkelä, and Pekka Martikainen. 2015. Minimum prices for alcohol and educational disparities in alcohol-related mortality. *Epidemiology* 26 (3):337-343.
- Hoadley, John F, Beth C Fuchs, and Harold D Holder. 1984. The Effect of Alcohol Beverage Restrictions on Consumption: A 25-Year Longitudinal Analysis. *The American Journal of Drug and Alcohol Abuse* 10 (3):375-401.
- Hogarty, Thomas F, and Kenneth G Elzinga. 1972. The Demand for Beer. *The Review of Economics and Statistics* 54 (2):195-198.
- Hollingworth, William, Beth E Ebel, Carolyn A McCarty, Michelle M Garrison, Dimitri A Christakis, and Frederick P Rivara. 2006. Prevention of deaths from harmful drinking in the United States: the potential effects of tax increases and advertising bans on young drinkers. *Journal of studies on alcohol* 67 (2):300-308.

- Holm, Pasi. 1995. Alcohol content and demand for alcoholic beverages: a system approach. *Empirical Economics* 20 (1):75-92.
- Holm, Pasi, and Ilpo Suoniemi. 1992. Empirical Application of Optimal Commodity Tax Theory to Taxation of Alcoholic Beverages. *The Scandinavian Journal of Economics* 94 (1):85-101.
- Horowitz, Ira, and Ann R Horowitz. 1965. Firms in a Declining Market: The Brewing Case. *Journal of Industrial Economics* 13 (2):129-153.
- Horverak, O. 1979. Norsk Alkoholpolitikk 1960–1975 [Norwegian Alcohol Policy 1960–1975: An Analysis of Alcohol Political Means and Their Effects]. Oslo: Statens Institutt For Alkoholforskning (SIFA).
- Hsieh, Chee-Ruey, Mau-Shan Shi, and Chien-Fu Jeff Lin. 2001. The impact of trade liberalization on alcohol consumption in Taiwan. In *The Economic Analysis of Substance Use and Abuse: The Experience of Developed Countries and Lessons for Developing Countries*, edited by M. Grossman and C.-R. Hsieh. Cheltenham, UK: Edward Elgar Publishing.
- Huang, Chao-Dong. 2003. Econometric Models of Alcohol Demand in the United Kingdom. Government Economic Service Working Paper No. 140. London, UK: HM Customs and Excise.
- Huitfeldt, B, and U Jorner. 1972. Efterfrågan på rusdrycker i Sverige. En ekonometrisk undersökning av konsumtionens utveckling efter motbokens avskaffande [Demand for alcoholic beverages in Sweden]. Rapport från Alkoholpolitiska utredningen, no. 91. Stockholm: Finansdepartementet.
- Jackson, Rachel, Maxine Johnson, Fiona Campbell, Josie Messina, Louise Guillaume, Petra Meier, Elizabeth Goyder, Jim Chilcott, and Nick Payne. 2010. Interventions on Control of Alcohol Price, Promotion and Availability for Prevention of Alcohol Use Disorders in Adults and Young People. Sheffield: School of Health and Related Research, University of Sheffield.
- Jamison, J, and L B Myers. 2008. Peer-group and price influence students drinking along with planned behaviour. *Alcohol Alcohol* 43 (4):492-7.
- Janda, Karel, J Mikolášek, and Martin Netuka. 2010. Complete almost ideal demand system approach to the Czech alcohol demand. *Agricultural Economics* 56 (9):421-434.
- Jithitikulchai, Theepakorn. 2010. Alcohol consumption: Tax instrumental variables in quadratic almost ideal demand system (QUAIDS) with clustered data. Paper read at International Conference On Applied Economics 2010, at Athens.
- John, Rijo M. 2005. Price Elasticity Estimates for Tobacco and Other Addictive Goods in India. Working Paper Series No. WP-2005-003. Mumbai, India: Indira Gandhi Institute of Development Research.
- Johnson, James A, and Ernest H Oksanen. 1974. Socio-economic determinants of the consumption of alcoholic beverages. *Applied Economics* 6 (4):293-302.
- . 1977. Estimation of Demand for Alcoholic Beverages in Canada From Pooled Time Series and Cross Sections. *The Review of Economics and Statistics* 59 (1):113-118.
- Johnson, James A, Ernest H Oksanen, Michael R Veall, and Deborah Fretz. 1992. Short-Run and Long-Run Elasticities for Canadian Consumption of Alcoholic Beverages: an Error-Correction Mechanism / Cointegration Approach. *The Review of Economics and Statistics* 74 (1):64-74.
- Johnson, Lester W. 1985. Alternative Econometric Estimates of the Effect of Advertising on the Demand for Alcoholic Beverages in the United Kingdom. *International Journal of Advertising* 4 (1):19-25.
- Jones, Andrew M. 1989. A systems approach to the demand for alcohol and tobacco. *Bulletin of Economic Research* 41 (2):85-106.
- Keane, John Gorman. 1965. An analysis of per capita beer demand in the United States, 1935-1963. Pittsburgh: University of Pittsburgh.
- Kendell, R E, M De Roumanie, and E B Ritson. 1983. Effect of Economic Changes on Scottish Drinking Habits 1978–82. *British Journal of Addiction* 78 (4):365-379.
- Keng, Shao-Hsun. 1998. The demand for health, alcohol abuse, and labor market outcomes: A longitudinal study, Department of Economics, Iowa State University, Ames, IO.
- Keng, Shao-Hsun, and Wallace E Huffman. 2007. Binge drinking and labor market success: a longitudinal study on young people. *Journal of Population Economics* 20 (1):35-54.

- Kenkel, D S. 1990. The Impact of State Laws on Drinking and Drunk Driving. Papers 5-90-4: Pennsylvania State, Department of Economics.
- Kenkel, Donald S. 1993. Drinking, Driving, and Deterrence: The Effectiveness and Social Costs of Alternative Policies. *The Journal of Law and Economics* 36 (2):877-913.
- . 1996. New Estimates of the Optimal Tax on Alcohol. *Economic Inquiry* 34 (2):296-319.
- Kim, Jean H, Alvin H Wong, William B Goggins, Joseph Lau, and Sian M Griffiths. 2013. Drink driving in Hong Kong: the competing effects of random breath testing and alcohol tax reductions. *Addiction* 108 (7):1217-28.
- Kochanowski, P, and T Heck. 1987. Shifts in the demand for alcohol: Some empirical findings. South Bend, IND: Department of Economics, Indiana University at South Bend.
- Koksal, Aycan. 2012. Three Essays on the Interdependence between Cigarette and Alcohol Consumption. Raleigh, NC: North Carolina State University.
- Kong, Q. 2003. Does advertising promote spirits consumption in Canada? Perth: University of Western Australia.
- Korczak, Dieter, Gerlinde Steinhauser, and Markus Dietl. 2011. Prevention of alcohol misuse among children, youths and young adults. *GMS Health Technol Assess* 7:Doc04.
- Kubik, Jeffrey D, and John R Moran. 2002. Can Policy Changes Be Treated as Natural Experiments? Evidence from State Excise Taxes. Syracuse University Center for Policy Research Working Paper No. 39. Syracuse, NY: Syracuse University Center for Policy Research.
- Kuo, Meichun, Jean-Luc Heeb, Gerhard Gmel, and Jürgen Rehm. 2003. Does Price Matter? The Effect of Decreased Price on Spirits Consumption in Switzerland. *Alcoholism: Clinical and Experimental Research* 27 (4):720-725.
- Kuo, Meichun, Henry Wechsler, Patty Greenberg, and Hang Lee. 2003. The marketing of alcohol to college students: the role of low prices and special promotions. *American journal of preventive medicine* 25 (3):204-211.
- Labys, Walter C. 1976. An international comparison of price and income elasticities for wine consumption. *Australian Journal of Agricultural Economics* 20 (1):33-36.
- Laixuthai, Adit, and Frank J Chaloupka. 1993. Youth alcohol use and public policy. *Contemporary Economic Policy* 11 (4):70-81.
- Larivière, Eric, Bruno Larue, and Jim Chalfant. 2000. Modeling the demand for alcoholic beverages and advertising specifications. *Agricultural Economics* 22 (2):147-162.
- Larue, Bruno, Alan Ker, and Lorrie MacKinnon. 1991. The demand for wine in ontario and the phasing-out of discriminatory mark-ups. *Agribusiness* 7 (5):475-488.
- Lau, Hung-Hay. 1975. Cost of alcoholic beverages as a determinant of alcohol consumption. In *Research Advances in Alcohol and Drug Problems. Volume 2*, edited by R. J. Gibbins, Y. Israel, H. Kalant, R. E. Popham, W. Schmidt and R. G. Smart. New York: John Wiley.
- Lee, Byunglak, and Victor J Tremblay. 1992. Advertising and the US market demand for beer. *Applied Economics* 24 (1):69-76.
- Lee, J M, M G Chen, T C Hwang, and C Y Yeh. 2010. Effect of cigarette taxes on the consumption of cigarettes, alcohol, tea and coffee in Taiwan. *Public Health* 124 (8):429-436.
- Lee, Jie-Min. 2007. The synergistic effect of cigarette taxes on the consumption of cigarettes, alcohol and betel nuts. *BMC Public Health* 7 (1):1-7.
- Lee, Jie-min, Sheng-hung Chen, Hsiang-hsi Liu, Jung-yao Hung, and Mei-yun Huang. 2010. Effects of health risk information on addictive goods consumption: A case of tobacco, alcohol, and betel nuts in Taiwan. *Contemporary Economic Policy* 28 (3):406-413.
- Leong, Stephen, and Xuedong Wang. 1994. Consumer Demand for Alcoholic Beverages in Florida: Consequence of a Checkoff Program. Paper read at Proceedings of the Florida State Horticultural Society.

- Leppänen, Kalervo, Risto Sullström, and Ilpo Suoniemi. 2001. Effects of economic factors on alcohol consumption in 14 European countries. *Nordic Studies on Alcohol and Drugs* 18 (1\_suppl):100-116.
- Leskinen, Esko, and Timo Teräsvirta. 1976. Forecasting the consumption of alcoholic beverages in Finland: A box-Jenkins approach. *European Economic Review* 8 (4):349-369.
- Levi, Annette E, and Raymond J Folwell. 1995. U.S. Demand for Imported Wines. *Journal of International Food & Agribusiness Marketing* 7 (1):79-91.
- Levy, D, and N Sheflin. 1983. New evidence on controlling alcohol use through price. *J Stud Alcohol* 44 (6):929-37.
- Levy, David, and Neil Sheflin. 1985. The Demand for Alcoholic Beverages: An Aggregate Time-Series Analysis. *Journal of Public Policy & Marketing* 4 (1):47-54.
- Li, Qing, Thomas F Babor, Donald Zeigler, Ziming Xuan, Donald Morisky, Melbourne F Hovell, Toben F Nelson, Weixing Shen, and Bing Li. 2015. Health promotion interventions and policies addressing excessive alcohol use: a systematic review of national and global evidence as a guide to health-care reform in China. *Addiction* 110 Suppl 1:68-78.
- Lidman, R M. 1976. Economic Issues in Alcohol Control. Berkeley: Social Research Group, School of Public Health, University of California.
- Lintonen, Tomi, Thomas Karlsson, Jaakko Nevalainen, and Anne Konu. 2013. Alcohol policy changes and trends in adolescent drinking in Finland from 1981 to 2011. *Alcohol Alcohol* 48 (5):620-6.
- Ludbrook, Anne, Dennis Petrie, Lynda McKenzie, and Shelley Farrar. 2012. Tackling alcohol misuse: purchasing patterns affected by minimum pricing for alcohol. *Appl Health Econ Health Policy* 10 (1):51-63.
- Lynk, William J. 1984. Interpreting Rising Concentration: The Case of Beer. *Journal of Business* 57 (1):43-55.
- Lyon, Andrew B., and Robert Schwab. 1991. Consumption Taxes in a Life-Cycle Framework: Are Sin Taxes Regressive? NBER Working Paper No. 3932. Cambridge, MA: National Bureau of Economic Research
- M, Kuo., J L Heeb, G Gmel, and J Rehm. 2004. Does Price Matter? The Effect of Decreased Price on Spirits Consumption in Switzerland. In *From Science to Action? 100 Years Later — Alcohol Policies Revisited*, edited by R. Müller and H. Klingemann. Dordrecht: Springer.
- Madden, David Patrick. 1992. A new set of consumer demand estimates for Ireland.
- Makela, Pia, Kim Bloomfield, Nina-Katri Gustafsson, Petri Huhtanen, and Robin Room. 2008. Changes in volume of drinking after changes in alcohol taxes and travellers' allowances: results from a panel study. *Addiction* 103 (2):181-91.
- Makela, Pia, and Esa Osterberg. 2009. Weakening of one more alcohol control pillar: a review of the effects of the alcohol tax cuts in Finland in 2004. *Addiction* 104 (4):554-63.
- Malmquist, S. 1948. A Statistical Analysis of the Demand for Liquor in Sweden, University of Uppsala, Uppsala, Sweden.
- Mangeloja, E, and J Pehkonen. 2009. Availability and consumption of alcoholic beverages: evidence from Finland. *Applied Economics Letters* 16 (4):425-429.
- Manning, Willard G, Linda Blumberg, and Lawrence H Moulton. 1995. The demand for alcohol: the differential response to price. *J Health Econ* 14 (2):123-48.
- Markowitz, Sara. 2001. The Role of Alcohol and Drug Consumption in Determining Physical Fights and Weapon Carrying by Teenagers. *Eastern Economic Journal* 27 (4):409-432.
- Martineau, Fred, Elizabeth Tyner, Theo Lorenc, Mark Petticrew, and Karen Lock. 2013. Population-level interventions to reduce alcohol-related harm: an overview of systematic reviews. *Prev Med* 57 (4):278-96.
- Mast, Brent D, Bruce L Benson, and David W Rasmussen. 1999. Beer Taxation and Alcohol-Related Traffic Fatalities. *Southern Economic Journal*:214-249.
- Mayo, J R. 2000. An estimate of US demand for alcoholic beverages, 1986–92. *Penn Econ Rev* 9 (1):1-4.

- McCarthy, Colm. 1977. Estimates of a system of demand equations using alternative commodity classifications of Irish data, 1953-1974. *The Economic and Social Review* 8 (3):201-211.
- McCornac, Dennis C, and Ronald W Filante. 1984. The demand for distilled spirits: an empirical investigation. *Journal of Studies on Alcohol* 45 (2):176-178.
- McGahan, Anita M. 1995. Cooperation in Prices and Capacities: Trade Associations in Brewing after Repeal. *The Journal of Law and Economics* 38 (2):521-559.
- McGuinness, Tony. 1980. An Econometric Analysis of Total Demand For Alcoholic Beverages in the U.K., 1956-75. *The Journal of Industrial Economics* 29 (1):85-109.
- . 1983. The demand for beer, spirits and wine in the UK, 1956-79. In *Economics and Alcohol: Consumption and Controls*, edited by M. Grant, M. Plant and A. Williams. New-York: Gardner Press.
- McLellan, Deborah Lee. 2011. Intended and unintended consequences: Effects of state cigarette price on smoking and current, binge, and heavy drinking by demographic group, The Heller School for Social Policy and Management, Brandeis University, Waltham, MA.
- Medina, Jorge L. 2011. Smoking, drinking, and binge drinking: an empirical study of the role of price on consumption by high school seniors, Graduate Faculty in Economics, City University of New York, New York, NY.
- Meier, Petra Sylvia, Robin Purshouse, and Alan Brennan. 2010. Policy options for alcohol price regulation: the importance of modelling population heterogeneity. *Addiction* 105 (3):383-393.
- Menon, Martina, Federico Perali, and Luca Piccoli. 2012. The passive drinking effect: a collective demand application. Verona: University of Verona, Department of Economics.
- Meyerhoefer, Chad D, Christine K Ranney, and David E Sahn. 2005. Consistent Estimation of Censored Demand Systems Using Panel Data. *American Journal of Agricultural Economics* 87 (3):660-672.
- Miller, G L, and I M Roberts. 1972. The Effect of Price Change on Wine Sales in Australia. *Quarterly Review of the Rural Economy* 25 (3):231-239.
- Mohler-Kuo, Meichun, Jurgen Rehm, Jean-Luc Heeb, and Gerhard Gmel. 2004. Decreased taxation, spirits consumption and alcohol-related problems in Switzerland. *J Stud Alcohol* 65 (2):266-73.
- Moosa, Imad Ahmed, and John L Baxter. 2002. Modelling the trend and seasonals within an AIDS model of the demand for alcoholic beverages in the United Kingdom. *Journal of Applied Econometrics* 17 (2):95-106.
- Mu, Y, H Liyuan, and M Songtian. 2001. Demand System Analysis of Consumption Demand of Urban and Rural Residents in China—An AIDS Model [in Chinese]. *Economic Issues* 8:25-28.
- Müller, Stefanie, Daniela Piontek, Alexander Pabst, Sebastian E. Baumeister, and Ludwig Kraus. 2010. Changes in alcohol consumption and beverage preference among adolescents after the introduction of the alcopops tax in Germany. *Addiction* 105 (7):1205-1213.
- Musgrave, Simon, and Nicholas Stern. 1988. Alcohol: Demand and taxation under monopoly and oligopoly in South India in the 1970s. *Journal of Development Economics* 28 (1):1-41.
- Mustonen, Heli, Pia Mäkelä, and Petri Huhtanen. 2007. People are buying and importing more alcohol than ever before. Where is it all going? *Drugs: Education, Prevention and Policy* 14 (6):513-527.
- Nair, Rima, Frank J. Chaloupka, Michael Grossman, and Henry Saffer. 2001. Gender and Race Differences in Youth Alcohol Demand. In *Economic Analysis of Substance Use and Abuse: The Experience of Developed Countries and Lessons for Developing Countries*, edited by M. Grossman and C.-R. Hsieh. Cheltenham, UK: Edward Elgar Publishing.
- Nayga Jr, Rodolfo M, and Oral Capps Jr. 1994. Analysis of alcohol consumption in the United States: Probability and level of intake. *Journal of Food Distribution Research* 25 (2):17-23.
- Nelson, Jon P. 1990. Effect of regulation on alcoholic beverage consumption: Regression diagnostics and influential data. In *Drug and Alcohol Abuse Reviews: Drug and Alcohol Abuse Prevention*, edited by R. R. Watson. Clifton, NJ: Human Press.

- . 1990. State monopolies and alcoholic beverage consumption. *Journal of Regulatory Economics* 2 (1):83-98.
- . 1997. Economic and demographic factors in US alcohol demand: a growth-accounting analysis. *Empirical Economics* 22 (1):83-102.
- . 1999. Broadcast Advertising and U.S. Demand for Alcoholic Beverages. *Southern Economic Journal* 65 (4):774-790.
- . 2003. Advertising Bans, Monopoly, and Alcohol Demand: Testing for Substitution Effects using State Panel Data. *Review of Industrial Organization* 22 (1):1-25.
- . 2008. How Similar are Youth and Adult Alcohol Behaviors? Panel Results for Excise Taxes and Outlet Density. *Atl Econ J* 36 (1):89-104.
- . 2010. Alcohol advertising bans, consumption and control policies in seventeen OECD countries, 1975–2000. *Applied Economics* 42 (7):803-823.
- . 2015. Binge drinking and alcohol prices: a systematic review of age-related results from econometric studies, natural experiments and field studies. *Health Econ Rev* 5:6.
- Nelson, Jon P, and Amy D McNall. 2016. Alcohol prices, taxes, and alcohol-related harms: A critical review of natural experiments in alcohol policy for nine countries. *Health Policy* 120 (3):264-272.
- Nelson, Jon P, and John R Moran. 1995. Advertising and US alcoholic beverage demand: system-wide estimates. *Applied Economics* 27 (12):1225-1236.
- Nelson, Jon P, and Douglas J Young. 2001. Do advertising bans work? An international comparison. *International Journal of Advertising* 20 (3):273-296.
- Nerlove, Marc, and William Addison. 1958. Statistical Estimation of Long-Run Elasticities of Supply and Demand. *Journal of Farm Economics* 40 (4):861-880.
- Niskanen, W A. 1960. Taxation and the Demand for Alcoholic Beverages. Santa Monica: RAND Corporation.
- Niskanen, William A. 1962. The Demand for Alcoholic Beverages: An Experiment in Econometric Method. Santa Monica, CA: RAND Corporation.
- Norman, Donald Alan. 1975. Structural Change and Performance in the US Brewing Industry, University of California, Los Angeles, Los Angeles.
- Norström, Thor. 2005. The price elasticity for alcohol in Sweden 1984–2003. *Nordic Studies on Alcohol and Drugs* 22 (1\_suppl):87-101.
- Norstrom, Thor, and Johan Svensson. 2014. The declining trend in Swedish youth drinking: collectivity or polarization? *Addiction* 109 (9):1437-46.
- Nyberg, A. 1967. Alkololijuomien kulutus ja hinnat [Consumption and Prices of Alcoholic Beverages]. Helsinki: The Finnish Foundation for Alcohol Studies.
- O'Mara, Ryan J, Dennis L Thombs, Alexander C Wagenaar, Matthew E Rossheim, Michele L Merves, Wei Hou, Virginia J Dodd, Steven B Pokorny, Robert M Weiler, and Bruce A Goldberger. 2009. Alcohol price and intoxication in college bars. *Alcohol Clin Exp Res* 33 (11):1973-80.
- OECD. 2015. Tackling Harmful Alcohol Use: Economics and Public Health Policy. Paris: Organisation for Economic Co-operation and Development.
- Ogwang, Tomson, and Danny I Cho. 2009. Economic determinants of the consumption of alcoholic beverages in Canada: a panel data analysis. *Empirical Economics* 37 (3):599-613.
- Okello, Andrew Kazora. 2001. An analysis of excise taxation in Kenya. African Economic Policy Discussion Paper Number 73. Nairobi, Kenya: Ministry of Finance.
- Ornstein, Stanley I, and Dominique M Hanssens. 1985. Alcohol Control Laws and the Consumption of Distilled Spirits and Beer. *Journal of Consumer Research* 12 (2):200-213.
- Osoro, Nehemiah, Philip Mpango, and Hamisi Mwinyimvua. 2001. An Analysis of Excise Taxation in Tanzania. African Economic Policy Discussion Paper Number 72. Dar es Salaam, Tanzania: University of Dar es Salaam.
- Owen, A D. 1979. The Demand for Wine in Australia, 1955–1977. *Economic Record* 55 (3):230-235.

- Özgülven, Cemhan 2004. Analysis of demand and pricing policies in Turkey beer market. Master of Science, Department of Industrial Engineering. Istanbul, Turkey: Graduate School of Natural and Applied Sciences, Middle East Technical University.
- Pacula, Rosalie Liccardo. 1998. Does increasing the beer tax reduce marijuana consumption? *Journal of Health Economics* 17 (5):557-585.
- Pagoulatos, Emilio, and Robert Sorensen. 1986. What determines the elasticity of industry demand? *International Journal of Industrial Organization* 4 (3):237-250.
- Pan, Suwen, and Cheng Fang. 2003. Liquor and Beverage Consumption in China: A Censored Demand System Approach. In *AAEA 2003 Annual meeting*. Montreal, Canada: American Agricultural Economics Association (AAEA).
- Pan, Suwen, Cheng Fang, and Jaime Malaga. 2006. Alcoholic beverage consumption in China: a censored demand system approach. *Applied Economics Letters* 13 (15):975-979.
- Partanen, Juha. 1991. *Sociability and intoxication: Alcohol and drinking in Kenya, Africa, and the modern world*. Helsinki: Finnish Foundation for Alcohol Studies.
- Pearce, D. 1985. The demand for alcohol in New Zealand. Discussion Paper No. 86.02. Perth: Department of Economics, University of Western Australia.
- Penm, Jammie H. 1988. An Econometric Study of the Demand for Bottled, Canned and Bulk Beer. *Economic Record* 64 (4):268-274.
- Picone, Gabriel A, Frank Sloan, and Justin G Trogdon. 2004. The effect of the tobacco settlement and smoking bans on alcohol consumption. *Health Econ* 13 (10):1063-80.
- Pierani, Pierpaolo, and Silvia Tiezzi. 2009. Addiction and interaction between alcohol and tobacco consumption. *Empirical Economics* 37 (1):1-23.
- . 2011. Infrequency of Purchase, Individual Heterogeneity and Rational Addiction in Single Households' Estimates of Alcohol Consumption. *Giornale degli Economisti e Annali di Economia* 70 (2):93-116.
- Poapongsakorn, N, S Leelahanon, D Laovakul, E Tasarika, S Methasutharuks, T Jittreekhun, and P Rungruangarn. 2007. Assessment of the Impact of Liquor Tax on Prices and Consumption of Liquor [in Thai]. Bangkok: Center for Alcohol Studies.
- Pompelli, Greg, and Dale Heien. 1991. Discrete/continuous consumer demand choices: An application to the US domestic and imported white wine markets. *European Review of Agricultural Economics* 18 (1):117-130.
- Popovici, Ioana, and Michael T French. 2013. Does Unemployment Lead to Greater Alcohol Consumption? *Industrial Relations: A Journal of Economy and Society* 52 (2):444-466.
- Powell, Lisa M, Christina U Czart-Ciecierski, Frank J Chaloupka, and Henry Wechsler. 2002. Binge Drinking and Violence among College Students: Sensitivity to Correlation in the Unobservables. Research Paper Series, No. 20. In *ImpacTeen Research Paper Series*. Chicago, IL: University of Illinois at Chicago.
- Prest, Alan Richmond. 1949. Some Experiments in Demand Analysis. *The Review of Economics and Statistics* 31 (1):33-49.
- Quek, Kelvin E. 1988. The Demand of Alcohol in Canada: An econometric study. Discussion Paper No. 88.08. Perth: The University of Western Australia, Department of Economics.
- Rabow, J, C Schwartz, S Stevens, and R K Watts. 1982. Social Psychological Dimensions of Alcohol Availability: The Relationship of Perceived Social Obligations, Price Considerations, and Energy Expended to the Frequency, Amount, and Type of Alcoholic Beverage Consumed. *Int J Addict* 17 (8):1259-71.
- Ramful, Preety, and Xueyan Zhao. 2008. Individual Heterogeneity in Alcohol Consumption: The Case of Beer, Wine and Spirits in Australia. *Economic Record* 84 (265):207-222.
- Ramstedt, Mats. 2010. Change and stability? Trends in alcohol consumption, harms and policy: Sweden 1990–2010. *Nordic Studies on Alcohol and Drugs* 27 (5):409-424.



- Raninen, Jonas, Håkan Leifman, and Mats Ramstedt. 2013. Who Is Not Drinking Less in Sweden? An Analysis of the Decline in Consumption for the Period 2004–2011. *Alcohol and Alcoholism* 48 (5):592-597.
- Raninen, Jonas, Michael Livingston, and Hakan Leifman. 2014. Declining trends in alcohol consumption among Swedish youth-does the theory of collectivity of drinking cultures apply? *Alcohol Alcohol* 49 (6):681-6.
- Renna, Francesco. 2007. The economic cost of teen drinking: late graduation and lowered earnings. *Health Econ* 16 (4):407-19.
- Rhoads, Jennifer K. 2010. Consequences of Tobacco Control Policies: Intended and Unintended, Department of Economics, University of Illinois at Chicago, Chicago, IL.
- Ripatti, Samuli, and Pia Makela. 2008. Conditional models accounting for regression to the mean in observational multi-wave panel studies on alcohol consumption. *Addiction* 103 (1):24-31.
- Room, Robin, Kim Bloomfield, Gerhard Gmel, Ulrike Grittner, Nina-Katri Gustafsson, Pia Mäkelä, Esa Österberg, Mats Ramstedt, Jürgen Rehm, and Matthias Wicki. 2013. What happened to alcohol consumption and problems in the Nordic countries when alcohol taxes were decreased and borders opened? *The International Journal of Alcohol and Drug Research* 2 (1):77-87.
- Rossov, Ingeborg, Pia Makela, and William C Kerr. 2014. The collectivity of changes in alcohol consumption revisited. *Addiction* 109 (9):1447-55.
- Ruhm, Christopher J. 1995. Economic conditions and alcohol problems. *Journal of Health Economics* 14 (5):583-603.
- Ruhm, Christopher J, Alison Snow Jones, Kerry Anne McGeary, William C Kerr, Joseph V Terza, Thomas K Greenfield, and Ravi S Pandian. 2012. What U.S. data should be used to measure the price elasticity of demand for alcohol? *J Health Econ* 31 (6):851-62.
- Rush, Brian, Mark Steinberg, and Robert Brook. 1986. The Relationships Among Alcohol Availability, Alcohol Consumption and Alcohol-Related Damage in the Province of Ontario and the State of Michigan 1955-1982. *Advances in Alcohol & Substance Abuse* 5 (4):33-45.
- Sabuhoro, Jean Bosco, Bruno Larue, and Eric Larivière. 1997. Advertising Expenditures and the Consumption of Alcoholic Beverages. *Journal of International Food & Agribusiness Marketing* 8 (3):37-54.
- Saffer, Henry. 1989. Alcohol consumption and Tax Differentials Between Beer, Wine and Spirits. NBER Working Paper No. 3200. Cambridge, MA: National Bureau of Economic Research
- . 2000. Alcohol Consumption and Alcohol Advertising Bans. NBER Working Papers 7758.
- Saffer, Henry, and Dhaval Dave. 2002. Alcohol consumption and alcohol advertising bans. *Applied Economics* 34 (11):1325-1334.
- . 2006. Alcohol advertising and alcohol consumption by adolescents. *Health Econ* 15 (6):617-37.
- Salisu, MA, and Vudayagiri N Balasubramanyam. 1997. Income and price elasticities of demand for alcoholic drinks. *Applied Economics Letters* 4 (4):247-251.
- Salo, Maija. 1990. Alkoholijuomien vähittäiskulutuksen analyysi vuosilta 1969–1988 [An analysis of off-premises of retail sales of alcohol beverages, 1969-1988]. Helsinki: Alko.
- Sam, Abdoul G, and Stanley R Thompson. 2012. Country of origin advertising and US demand of imported wine: an empirical analysis. *Applied Economics Letters* 19 (18):1871-1877.
- Sander, William. 1999. Cognitive Ability, Schooling and the Demand for Alcohol by Young Adults. *Education Economics* 7 (1):53-66.
- Sass, Tim R, and David S Saurman. 1993. Mandated Exclusive Territories and Economic Efficiency: An Empirical Analysis of the Malt-Beverage Industry. *The Journal of Law and Economics* 36 (1, Part 1):153-177.
- . 2001. Mandated exclusive territories: Efficiency effects and regulatory selection bias. In *Advertising and Differentiated Products (Advances in Applied Microeconomics, Vol. 10)*, edited by M. R. Baye and J. P. Nelson. Bingley: Emerald Group Publishing Limited.

- Schweitzer, Stuart O, Michael D Intriligator, and H Salehi. 1983. Alcoholism: an econometric model of its causes, its effects, and its control. In *Economics and Alcohol*, edited by M. Grant, A. Williams and M. Plant. London, UK: Croom Helm.
- Seale Jr, James L, Mary A Marchant, and Alberto Basso. 2003. Imports versus Domestic Production: A Demand System Analysis of the U.S. Red Wine Market. *Applied Economic Perspectives and Policy* 25 (1):187-202.
- Selvanathan, Eliyathamby Antony. 1988. Alcohol consumption in the UK, 1955–85: a system-wide analysis. *Applied Economics* 20 (8):1071-1086.
- . 1989. Advertising and Alcohol Demand in the UK: Further Results. *International Journal of Advertising* 8 (2):181-188.
- . 1991. Cross-country alcohol consumption comparison: an application of the Rotterdam demand system. *Applied Economics* 23 (10):1613-1622.
- . 1995. The effects of advertising on alcohol consumption: An empirical analysis. In *Recent Developments in Applied Demand Analysis*, edited by E. A. Selvanathan and K. W. Clements. Berlin, Heidelberg: Springer.
- Selvanathan, Eliyathamby Antony, and Saroja Selvanathan. 2004. Economic and demographic factors in Australian alcohol demand. *Applied Economics* 36 (21):2405-2417.
- Selvanathan, Saroja. 2006. How similar are alcohol drinkers? International evidence. *Applied Economics* 38 (12):1353-1362.
- . 2017. *The Demand for Alcohol, Tobacco and Marijuana: International Evidence*. London: Routledge.
- Selvanathan, Saroja , and Eliyathamby Antony Selvanathan. 2005. *The demand for alcohol, tobacco and marijuana: international evidence*. Aldershot, Hants, England: Ashgate.
- Selvanathan, Saroja, and Eliyathamby Antony Selvanathan. 2005. Empirical Regularities in Cross-Country Alcohol Consumption. *Economic Record* 81 (1):S128-S142.
- . 2007. Another look at the identical tastes hypothesis on the analysis of cross-country alcohol data. *Empirical Economics* 32 (1):185-215.
- Sharma, Anurag, Brian Vandenberg, and Bruce Hollingsworth. 2014. Minimum pricing of alcohol versus volumetric taxation: which policy will reduce heavy consumption without adversely affecting light and moderate consumers? *PLoS One* 9 (1):e80936.
- Sheron, Nick, Fern Chilcott, Laura Matthews, Ben Challoner, and Maria Thomas. 2014. Impact of minimum price per unit of alcohol on patients with liver disease in the UK. *Clinical Medicine* 14 (4):396.
- Shi, Yuyan. 2011. Three Essays on Economics of Health Behavior in China. Ph.D. dissertation, Pardee RAND Graduate School. Santa Monica, CA: RAND Corporation.
- Simon, Julian L. 1966. The Price Elasticity of Liquor in the U.S. and a Simple Method of Determination. *Econometrica* 34 (1):193-205.
- Skog, Ole-Jørgen, and Hans Olav Melberg. 2006. Becker's rational addiction theory: an empirical test with price elasticities for distilled spirits in Denmark 1911–31. *Addiction* 101 (10):1444-1450.
- Sloan, F A, B A Reilly, and C Schenzler. 1994. Effects of prices, civil and criminal sanctions, and law enforcement on alcohol-related mortality. *J Stud Alcohol* 55 (4):454-65.
- Sloan, Frank A., Bridget A. Reilly, and Christoph Schenzler. 1995. Effects of Tort Liability and Insurance on Heavy Drinking and Drinking and Driving. *The Journal of Law and Economics* 38 (1):49-77.
- Smart, Reginald G., and Robert E. Mann. 1998. Treatment, Alcoholics Anonymous and alcohol controls during the decrease in alcohol problems in Alberta: 1975–1993. *Alcohol and Alcoholism* 33 (3):265-272.
- Smith, Rodney T. 1976. The Legal and Illegal Markets for Taxed Goods: Pure Theory and an Application to State Government Taxation of Distilled Spirits. *The Journal of Law and Economics* 19 (2):393-429.
- South African National Treasury, and Tax Policy Chief Directorate. 2002. The Taxation of Alcoholic Beverages in South Africa. Final Report. Pretoria: Government of South Africa.

- Spurry, Steve. 1999. Demographic Influence on the US Demand for Beer: Mary Washington College.
- Stafström, Martin. 2007. Consequences of an Increase in Availability Due to an Eroded National Alcohol Policy: A Study of Changes in Consumption Patterns and Experienced Alcohol-Related Harm among 17- to 18-Year-Olds in Southern Sweden, 2003–2005. *Contemporary Drug Problems* 34 (4):575-588.
- Stafstrom, Martin, and Per-Olof Ostergren. 2014. The impact of policy changes on consumer behaviour and alcohol consumption in Scania, Sweden 1999-2005. *Alcohol Alcohol* 49 (5):572-8.
- Stehr, Mark. 2007. The Effect of Sunday Sales Bans and Excise Taxes on Drinking and Cross—Border Shopping for Alcoholic Beverages. *National Tax Journal* 60 (1):85-105.
- Stockwell, T. I. M., Tanya Chikritzhs, Delia Hendrie, Richard Fordham, Faith Ying, Mike Phillips, Joanne Cronin, and Bridie O'Reilly. 2001. The public health and safety benefits of the Northern Territory's Living with Alcohol programme. *Drug and Alcohol Review* 20 (2):167-180.
- Stockwell, Tim, M Christopher Auld, Jinhui Zhao, and Gina Martin. 2012. Does minimum pricing reduce alcohol consumption? The experience of a Canadian province. *Addiction* 107 (5):912-920.
- Stockwell, Tim, Ernie Lang, and Phil Rydon. 1993. High risk drinking settings: the association of serving and promotional practices with harmful drinking. *Addiction* 88 (11):1519-26.
- Stockwell, Tim, Jinhui Zhao, Norman Giesbrecht, Scott Macdonald, Gerald Thomas, and Ashley Wettlaufer. 2012. The raising of minimum alcohol prices in Saskatchewan, Canada: impacts on consumption and implications for public health. *Am J Public Health* 102 (12):e103-10.
- Stockwell, Tim, Jinhui Zhao, Gina Martin, Scott Macdonald, Kate Vallance, Andrew Treno, William Ponicki, Andrew Tu, and Jane Buxton. 2013. Minimum alcohol prices and outlet densities in British Columbia, Canada: estimated impacts on alcohol-attributable hospital admissions. *American journal of public health* 103 (11):2014-2020.
- Stone, Richard. 1945. The Analysis of Market Demand. *Journal of the Royal Statistical Society* 108 (3/4):286-391.
- . 1951. *The Role of Measurement in Economics*. Cambridge, England: University Press.
- Stone, Richard, and Deryck Almond Rowe. 1958. Dynamic Demand Functions: Some Econometric Results. *The Economic Journal* 68 (270):256-270.
- Stout, E M, F A Sloan, L Liang, and H H Davies. 2000. Reducing harmful alcohol-related behaviors: effective regulatory methods. *J Stud Alcohol* 61 (3):402-12.
- Su, Shew-Juan B, and Steven T Yen. 2000. A censored system of cigarette and alcohol consumption. *Applied Economics* 32 (6):729-737.
- Sundström, Åke, and John Ekström. 1962. *Dryckeskonsumtionen i Sverige [Beverage consumption in Sweden]*. Stockholm: Industriens Utredningsinstitut.
- Sutton, Matthew, and Christine Godfrey. 1995. A grouped data regression approach to estimating economic and social influences on individual drinking behaviour. *Health Econ* 4 (3):237-47.
- Svensson, Johan. 2012. Alcohol Consumption and Harm among Adolescents in Sweden: Is Smuggled Alcohol More Harmful? *Journal of Child & Adolescent Substance Abuse* 21 (2):167-180.
- Svensson, Johan, and Jonas Landberg. 2013. Is Youth Violence Temporally Related to Alcohol? A Time-Series Analysis of Binge Drinking, Youth Violence and Total Alcohol Consumption in Sweden. *Alcohol and Alcoholism* 48 (5):598-604.
- Swidler, Steve. 1986. A Reexamination of Liquor Price and Consumption Differences between Public and Private Ownership States: Comment. *Southern Economic Journal* 53 (1):259-264.
- Taplin, J, and W Ryan. 1969. The Prospects for Wine in Australia. *Quarterly Review of the Rural Economy* 22 (4):198.
- Taube, Paul M, William L Huth, and Don N MacDonald. 1990. An analysis of consumer expectation effects on demand in a dynamic almost ideal demand system. *Journal of Economics and Business* 42 (3):225-236.

- Taube, Paul M, and Don N MacDonald. 1991. A dynamic almost ideal demand system incorporating consumer expectations. *Managerial and Decision Economics* 12 (3):197-206.
- Tegene, Ababayehu. 1990. The Kalman filter approach for testing structural change in the demand for alcoholic beverages in the US. *Applied Economics* 22 (10):1407-1416.
- Terza, Joseph V. 2002. Alcohol abuse and employment: a second look. *Journal of Applied Econometrics* 17 (4):393-404.
- Theil, Henri, and Kenneth W Clements. 1987. *Applied demand analysis: Results from system-wide approaches*. Cambridge, MA: Ballinger Publishing Company.
- Thom, Rodney. 1984. The demand for alcohol in Ireland. UCD Centre for Economic Research Working Paper Series; No. 24. Dublin: University College Dublin, School of Economics.
- Thombs, Dennis L, Virginia Dodd, Steven B Pokorny, Morrow R Omli, Ryan O'Mara, Monica C Webb, Diana M Lacaci, and Chad Werch. 2008. Drink specials and the intoxication levels of patrons exiting college bars. *Am J Health Behav* 32 (4):411-9.
- Thombs, Dennis L, Ryan O'Mara, Virginia J Dodd, Wei Hou, Michele L Merves, Robert M Weiler, Steven B Pokorny, Bruce A Goldberger, Jennifer Reingle, and Chudley Chad E Werch. 2009. A field study of bar-sponsored drink specials and their associations with patron intoxication. *J Stud Alcohol Drugs* 70 (2):206-14.
- Thompson, Stanley R., and Abdoul G. Sam. 2008. Country of origin advertising and US wine imports.
- Tian, Guoqiang, and Feng Liu. 2011. Is the demand for alcoholic beverages in developing countries sensitive to price? Evidence from China. *Int J Environ Res Public Health* 8 (6):2124-31.
- Tiezzi, Silvia, and Pierpaolo Pierani. 2007. Addiction and alcohol consumption: Evidence from Italian Data. *Giornale Degli Economisti e Annali Di Economia* 70 (2):265-284.
- Tiffin, R, K Balcombe, M Salois, and A Kehlbacher. 2011. Estimating food and drink elasticities. In *University of Reading*, edited by Reading.
- Treisman, Daniel. 2010. Death and prices. *Economics of Transition and Institutional Change* 18 (2):281-331.
- Treno, Andrew J, Robert Nash Parker, and Harold D Holder. 1993. Understanding US alcohol consumption with social and economic factors: a multivariate time series analysis, 1950-1986. *Journal of Studies on Alcohol* 54 (2):146-156.
- Trolldal, Björn, and William Ponicki. 2005. Alcohol price elasticities in control and license states in the United States, 1982-99. *Addiction* 100 (8):1158-1165.
- Troncoso-Valverde, Cristián. 2004. Preference shifts, structural breaks and the domestic demand for Chilean wine. *Revista de Economía e Sociología Rural* 42:487-506.
- Tsolakis, Dimitris, Paul C Riethmuller, and Geof Watts. 1983. The Demand for Wine and Beer. *Review of Marketing and Agricultural Economics* 51 (2):131-153.
- Uri, Noel D. 1986. The demand for beverages and interbeverage substitution in the United States. *Bulletin of Economic Research* 38 (1):77-85.
- van Hoof, Joris, Marieke van Noordenburg, and Menno de Jong. 2008. Happy hours and other alcohol discounts in cafes: prevalence and effects on underage adolescents. *J Public Health Policy* 29 (3):340-52.
- Volland, Benjamin. 2012. Elasticities of German Beer Demand Revisited. Jena: Max Planck Institute of Economics.
- Wagenaar, Alexander C, Matthew J Salois, and Kelli A Komro. 2009. Effects of beverage alcohol price and tax levels on drinking: a meta-analysis of 1003 estimates from 112 studies. *Addiction* 104 (2):179-90.
- Wagoner, Kimberly G., Jill Blocker, Thomas P. McCoy, Erin L. Sutfin, Heather Champion, and Mark Wolfson. 2012. Free Alcohol Use and Consequences: Gender Differences Among Undergraduates. *American Journal of Health Behavior* 36 (4):446-458.
- Wald, Ignacy, and Jacek Moskalewicz. 1984. Alcohol Policy in a Crisis Situation. *British Journal of Addiction* 79 (3):331-335.

- Wales, Terence J. 1968. Distilled Spirits and Interstate Consumption Effects. *The American Economic Review* 58 (4):853-863.
- Walsh, Brendan M. 1982. The Demand for Alcohol in the UK: A Comment. *The Journal of Industrial Economics* 30 (4):439-446.
- Walsh, Brendan M, and Dermot Walsh. 1970. Economic Aspects of Alcohol Consumption in the Republic of Ireland. *Economic and Social Review* 1:115-138.
- Wang, Jirong, XM Gao, Eric J Wailes, and Gail L Cramer. 1996. U.S. Consumer Demand for Alcoholic Beverages: Cross-Section Estimation of Demographic and Economic Effects. *Review of Agricultural Economics* 18 (3):477-489.
- Wang, Qingbin, Catherine Chan Halbrendt, and Helen H Jensen. 1997. China's beer consumption and barley imports. *Agribusiness* 13 (1):73-84.
- Waters, Teresa M, and Frank A Sloan. 1995. Why do people drink? Tests of the rational addiction model. *Applied Economics* 27 (8):727-736.
- Wechsler, Henry, Meichun Kuo, Hang Lee, and George W Dowdall. 2000. Environmental correlates of underage alcohol use and related problems of college students. *Am J Prev Med* 19 (1):24-9.
- Weitzman, Elissa R, Toben F Nelson, and Henry Wechsler. 2003. Taking up binge drinking in college: the influences of person, social group, and environment. *J Adolesc Health* 32 (1):26-35.
- West, Sarah E, and Ian W H Parry. 2009. Alcohol-Leisure Complementarity: Empirical Estimates and Implications for Tax Policy. *National Tax Journal* 62 (4):611-633.
- Wette, Hildegard C, Jia-Fang Zhang, Richard J Berg, and Sally Casswell. 1993. The effect of prices on alcohol consumption in New Zealand 1983–1991. *Drug and Alcohol Review* 12 (2):151-158.
- Wilkinson, James T. 1987. Reducing Drunken Driving: Which Policies Are Most Effective? *Southern Economic Journal* 54:322-334.
- Wilkinson, James T. 1987. The effects of regulation on the demand for alcohol. Working Paper. Columbia, MO: Department of Economics, University of Missouri.
- Williams, Jenny, Frank J Chaloupka, and Henry Wechsler. 2005. Are There Differential Effects of Price and Policy on College Students' Drinking Intensity? *Contemporary Economic Policy* 23 (1):78-90.
- Williams, Jenny, Rosalie Liccardo Pacula, Frank J. Chaloupka, and Henry Wechsler. 2004. Alcohol and marijuana use among college students: economic complements or substitutes? *Health Economics* 13 (9):825-843.
- Williams, Jenny, Lisa M. Powell, and Henry Wechsler. 2003. Does alcohol consumption reduce human capital accumulation? Evidence from the College Alcohol Study. *Applied Economics* 35 (10):1227-1239.
- Wohlgenant, Michael K. 2011. Rational Addiction in US Demand for Table Wine. Paper read at Econometric Society Australasian Meeting Proceedings, at Adelaide, Australia.
- Wolaver, Amy, Christina Ciecierski, Lisa Powell, and Henry Wechsler. 2007. Peer Effects and their Role in Binge Drinking across American College Campuses. Research Paper Series, No. 33. Chicago, IL: University of Illinois at Chicago.
- Wolaver, Amy M. 2007. Does Drinking Affect Grades More for Women? Gender Differences in the Effects of Heavy Episodic Drinking in College. *The American Economist* 51 (2):72-88.
- Wong, Alfred Y-T. 1988. The demand for alcohol in the UK 1920-1938: an econometric study. Discussion Paper 88.13. Perth: Economic Research Centre, Department of Economics, The University of Western Australia.
- Wu, Yanrui, and Harry X Wu. 1997. Household Grain Consumption in China: Effects of Income, Price and Urbanization. *Asian Economic Journal* 11 (3):325-342.
- Xu, Xin, and Frank J Chaloupka. 2011. The effects of prices on alcohol use and its consequences. *Alcohol Res Health* 34 (2):236-45.

- Xuan, Ziming, Toben F Nelson, Timothy Heeren, Jason Blanchette, David E Nelson, Paul Gruenewald, and Timothy S Naimi. 2013. Tax Policy, Adult Binge Drinking, and Youth Alcohol Consumption in the United States. *Alcoholism: Clinical and Experimental Research* 37 (10):1713-1719.
- Yamada, T., M. Kendix, and T. Yamada. 1996. The impact of alcohol consumption and marijuana use on high school graduation. *Health Econ* 5 (1):77-92.
- Yen, Steven T. 1993. Cross-Section Estimation of U.S. Demand for Alcoholic Beverages. *American Journal of Agricultural Economics* 75 (5):1317.
- . 1994. Cross-section estimation of US demand for alcoholic beverage. *Applied Economics* 26 (4):381-392.
- . 1995. Alternative transformations in a class of limited dependent variable models: alcohol consumption by US women. *Applied Economics Letters* 2 (8):258-262.
- Yen, Steven T, and Helen H Jensen. 1996. Determinants of Household Expenditures on Alcohol. *Journal of Consumer Affairs* 30 (1):48-67.
- Young, Douglas J., and Agnieszka Bielinska-Kwapisz. 2003. Alcohol consumption, beverage prices and measurement error. *Journal of Studies on Alcohol* 64 (2):235-238.
- Yu, Weiqiu, and Long Chen. 1998. The Demand for Alcoholic Beverages in New Brunswick, Canada: A Cointegration Analysis. *Canadian Journal of Regional Science* 21 (1):1-14.
- Yu, Xiaohua, and David Abler. 2010. Interactions between cigarette and alcohol consumption in rural China. *Eur J Health Econ* 11 (2):151-60.
- Zardkoohi, Asghar, and Alain Sheer. 1984. Public versus Private Liquor Retailing: An Investigation into the Behavior of the State Governments. *Southern Economic Journal* 50 (4):1058-1076.
- Zereyesus, Yacob Abrehe. 2010. Essays in applied demand and production analysis, Department of Agriculture Economics, College of Agriculture, Kansas State University, Manhattan, KS.
- Zhang, D, X Pan, and C Li. 2001. Analysis of an Application of AIDS to Food Consumption [in Chinese]. *Journal of Henan Agricultural University* 35 (2):163-168.
- Zhang, Jia-Fang, and Sally Casswell. 1999. The effects of real price and a change in the distribution system on alcohol consumption. *Drug and Alcohol Review* 18 (4):371-378.
- Zhang, Ning. 2010. Alcohol Taxes and Birth Outcomes. *Int J Environ Res Public Health* 7 (5):1901-12.
- Zhao, Jinhui, Tim Stockwell, Gina Martin, Scott Macdonald, Kate Vallance, Andrew Treno, William R Ponicki, Andrew Tu, and Jane Buxton. 2013. The relationship between minimum alcohol prices, outlet densities and alcohol-attributable deaths in British Columbia, 2002–09. *Addiction* 108 (6):1059-1069.
- Zhao, Xueyan, and Mark N Harris. 2004. Demand for Marijuana, Alcohol and Tobacco: Participation, Levels of Consumption and Cross-equation Correlations. *Economic Record* 80 (251):394-410.
- Zhou, S. 2003. An Empirical Analysis with AIDS—The Econometric Estimation on the Demand for Agricultural Products of Jiangsu Rural Residents [in Chinese]. *Journal of Nanjing Agricultural University* 26 (3):96-100.
- Zhuk, Oksana. 2011. Advertising effects of beer consumption among young adults with a consideration of the welfare effects of advertising in the presence of search costs and negative externalities, Department of Economics, University of Texas at Dallas, Dallas, TX.

**Appendix 3.** List of studies included in reviews from low- and middle-income countries.

- Andrienko, Yuri, and Aleksandr Nemtsov. 2005. Estimation of individual demand for alcohol. EERC Working Paper Series No 05/10. Moscow: Economics Education and Research Consortium.
- Baltagi, Badi H, and Ingo Geishecker. 2006. Rational alcohol addiction: evidence from the Russian longitudinal monitoring survey. *Health Economics* 15 (9):893-914.
- Belanciu, Ana. 2006. Estimation of individual demand for alcohol: evidence from Ukraine. Master of Arts, Economics. Kyiv: National University of Kyiv-Mohyla Academy.
- Bhattacharya, Jay, Christina Gathmann, and Grant Miller. 2013. The Gorbachev anti-alcohol campaign and Russia's mortality crisis. *American Economic Journal: Applied Economics* 5 (2):232-60.
- Bishop, John A, Haiyong Liu, and Qi Meng. 2007. Are Chinese smokers sensitive to price? *China Economic Review* 18 (2):113-121.
- Bureau for Economic Research. 2010. Econometric Estimates of the Price and Income Elasticities of the Demand for Liquor in South Africa. Report prepared for the South African Liquor Brand owners Association (SALBA). Stellenbosch: Bureau for Economic Research, University of Stellenbosch.
- Chang, X, and A Li. 2006. A Study on Rural Residents' Food Consumption Demand in Jiangsu Province [in Chinese]. *Journal of Nanjing Agricultural University (Social Sciences Edition)* 6 (2):20-24.
- Dong, G. 2009. Positive Analysis of Food Consumption of Rural Residents in West Areas [in Chinese]. *Journal of Anhui Agricultural Science* 37 (4):1815-1817.
- Dong, G, and W Lu. 2009. An AIDS Model Analysis on Food Demand of Chinese Residents: A Case of Urban Areas in the West [in Chinese]. *Statistics and Information Forum* 24 (9):76-80.
- Fan, Shenggen, Gail Cramer, and Eric Wailes. 1994. Food demand in rural China: evidence from rural household survey. *Agricultural Economics* 11 (1):61-69.
- Fan, Shenggen, Eric J. Wailes, and Gail L. Cramer. 1995. Household Demand in Rural China: A Two-Stage LES-AIDS Model. *American Journal of Agricultural Economics* 77 (1):54-62.
- Florkowski, Wojciech J, and Kevin T McNamara. 1992. Policy implications of alcohol and tobacco demand in Poland. *Journal of Policy Modeling* 14 (1):93-98.
- Gyórfi, Zoltán. 2006. Transformation of the Hungarian beer market in the light of international tendencies. Ph.D. thesis. Budapest: Corvinus University of Budapest.
- John, Rijo M. 2005. Price Elasticity Estimates for Tobacco and Other Addictive Goods in India. Working Paper Series No. WP-2005-003. Mumbai, India: Indira Gandhi Institute of Development Research.
- Meyerhoefer, Chad D, Christine K Ranney, and David E Sahn. 2005. Consistent Estimation of Censored Demand Systems Using Panel Data. *American Journal of Agricultural Economics* 87 (3):660-672.
- Mu, Y, H Liyuan, and M Songtian. 2001. Demand System Analysis of Consumption Demand of Urban and Rural Residents in China—An AIDS Model [in Chinese]. *Economic Issues* 8:25-28.
- Musgrave, Simon, and Nicholas Stern. 1988. Alcohol: Demand and taxation under monopoly and oligopoly in South India in the 1970s. *Journal of Development Economics* 28 (1):1-41.
- Okello, Andrew Kazora. 2001. An analysis of excise taxation in Kenya. African Economic Policy. Discussion Paper Number 73. Nairobi, Kenya: Ministry of Finance.
- Osoro, Nehemiah, Philip Mpango, and Hamisi Mwinyimvua. 2001. An Analysis of Excise Taxation in Tanzania. African Economic Policy Discussion Paper Number 72. Dar es Salaam, Tanzania: University of Dar es Salaam.
- Özgülven, Cemhan. 2004. Analysis of demand and pricing policies in Turkey beer market. Master of Science, Department of Industrial Engineering. Istanbul, Turkey: Graduate School of Natural and Applied Sciences, Middle East Technical University.
- Pan, Suwen, and Cheng Fang. 2003. Liquor and Beverage Consumption in China: A Censored Demand System Approach. In *AAEA 2003 Annual meeting*. Montreal, Canada: American Agricultural Economics Association (AAEA).

- Pan, Suwen, Cheng Fang, and Jaime Malaga. 2006. Alcoholic beverage consumption in China: a censored demand system approach. *Applied Economics Letters* 13 (15):975-979.
- Partanen, Juha. 1991. *Sociability and intoxication: Alcohol and drinking in Kenya, Africa, and the modern world*. Helsinki: Finnish Foundation for Alcohol Studies.
- Poapongsakorn, N, S Leelahanon, D Laovakul, E Tasarika, S Methasutharuks, T Jittreekhun, and P Rungruangarn. 2007. Assessment of the Impact of Liquor Tax on Prices and Consumption of Liquor [in Thai]. Bangkok: Center for Alcohol Studies.
- Selvanathan, Saroja , and Eliyathamby Antony Selvanathan. 2005. *The demand for alcohol, tobacco and marijuana: international evidence*. Aldershot, Hants, England: Ashgate.
- Shi, Yuyan. 2011. Three Essays on Economics of Health Behavior in China. Ph.D. dissertation, Pardee RAND Graduate School. Santa Monica, CA: RAND Corporation.
- South African National Treasury, and Tax Policy Chief Directorate. 2002. The Taxation of Alcoholic Beverages in South Africa. Final Report. Pretoria: Government of South Africa.
- Tian, Guoqiang, and Feng Liu. 2011. Is the demand for alcoholic beverages in developing countries sensitive to price? Evidence from China. *Int J Environ Res Public Health* 8 (6):2124-31.
- Treisman, Daniel. 2010. Death and prices. *Economics of Transition and Institutional Change* 18 (2):281-331.
- Troncoso-Valverde, Cristián. 2004. Preference shifts, structural breaks and the domestic demand for Chilean wine. *Revista de Economía e Sociología Rural* 42:487-506.
- Wald, Ignacy, and Jacek Moskalewicz. 1984. Alcohol Policy in a Crisis Situation. *British Journal of Addiction* 79 (3):331-335.
- Wang, Qingbin, Catherine Chan Halbrendt, and Helen H Jensen. 1997. China's beer consumption and barley imports. *Agribusiness* 13 (1):73-84.
- Wu, Yanrui, and Harry X Wu. 1997. Household Grain Consumption in China: Effects of Income, Price and Urbanization. *Asian Economic Journal* 11 (3):325-342.
- Yu, Xiaohua, and David Abler. 2010. Interactions between cigarette and alcohol consumption in rural China. *Eur J Health Econ* 11 (2):151-60.
- Zhang, D, X Pan, and C Li. 2001. Analysis of an Application of AIDS to Food Consumption [in Chinese]. *Journal of Henan Agricultural University* 35 (2):163-168.
- Zhou, S. 2003. An Empirical Analysis with AIDS—The Econometric Estimation on the Demand for Agricultural Products of Jiangsu Rural Residents [in Chinese]. *Journal of Nanjing Agricultural University* 26 (3):96-100.



#### Appendix 4. Characteristics of included 'umbrella reviews of reviews'

**Anderson P, Chisholm D, Fuhr DC. Effectiveness and cost-effectiveness of policies and programmes to reduce the harm caused by alcohol. The Lancet 2009; 373(9682): 2234-46.**

|                                                                                                   |                                                                                                                                                                                                                                                                                                                                                                    |
|---------------------------------------------------------------------------------------------------|--------------------------------------------------------------------------------------------------------------------------------------------------------------------------------------------------------------------------------------------------------------------------------------------------------------------------------------------------------------------|
| Type of review / publication                                                                      | - narrative review<br>- Journal: Lancet                                                                                                                                                                                                                                                                                                                            |
| Was an 'a priori' design provided?                                                                | No.                                                                                                                                                                                                                                                                                                                                                                |
| Was there duplicate study selection and data extraction?                                          | No.                                                                                                                                                                                                                                                                                                                                                                |
| Was a comprehensive literature search performed?                                                  | Unclear; search strategy not described.<br>- databases: Cochrane library, MEDLINE, Web of Science, and Web of Knowledge<br>- year / month of last search: not reported;<br>- # of studies included: 3 reviews (Fogarty, 2006; Gallet, 2007; Wagenaar, Salois et al., 2009, 1 book (Cook, 2007), and 4 individual studies.<br>- LMIC: 1 (Pan, Malaga, 2006 - China) |
| Was the status of publication (i.e. grey literature) used as an inclusion criterion?              | Unclear                                                                                                                                                                                                                                                                                                                                                            |
| Was a list of studies (included and excluded) provided?                                           | No                                                                                                                                                                                                                                                                                                                                                                 |
| Were the characteristics of the included studies provided?                                        | No                                                                                                                                                                                                                                                                                                                                                                 |
| Was the scientific quality of the included studies assessed and documented?                       | None. The quality of included studies was not assessed. The strength of the evidence was based on the type of study design of included studies: 1=more than one systematic review; 2=one systematic review; 3=two or more randomised controlled trials; 4=one randomised controlled trial; 5=observational evidence; 6=not assessed.                               |
| Was the scientific quality of the included studies used appropriately in formulating conclusions? | n/a                                                                                                                                                                                                                                                                                                                                                                |
| Were the methods used to combine the findings of studies appropriate?                             | n/a                                                                                                                                                                                                                                                                                                                                                                |
| Was the likelihood of publication bias assessed?                                                  | n/a                                                                                                                                                                                                                                                                                                                                                                |
| Funding, conflicts of interest reported?                                                          | - Review: yes; no specific funding or conflicts of interest reported;<br>- Included studies: no.                                                                                                                                                                                                                                                                   |

|                          |                                                                                                                                                                                                                                                                                                                                                                                                                                                                                                                                                                                           |
|--------------------------|-------------------------------------------------------------------------------------------------------------------------------------------------------------------------------------------------------------------------------------------------------------------------------------------------------------------------------------------------------------------------------------------------------------------------------------------------------------------------------------------------------------------------------------------------------------------------------------------|
| Results                  | <p>Specific results not presented. Alcohol taxes were found “effective” at reducing alcohol use. Evidence statement:</p> <ul style="list-style-type: none"> <li>- a meta-analysis noted a median price elasticity for all beverage types of <math>-0.52</math> in the short term and <math>-0.82</math> in the long term, elasticities being lower for beer than for wine or spirits (Gallet, 2007);</li> <li>- a meta-analysis noted mean price elasticities of <math>-0.46</math> for beer, <math>-0.69</math> for wine, and <math>-0.80</math> for spirits (Fogarty, 2006).</li> </ul> |
| Study's conclusion       | <p>Drinkers respond to changes in the price of alcohol as they do to changes in the price of other consumer products. Setting minimum prices can reduce acute and chronic harms.</p>                                                                                                                                                                                                                                                                                                                                                                                                      |
| Limitations/risk of bias | <p>Non-systematic and poorly described search strategy; unclear how included studies were selected; no quality assessment; only very broad results presented which limit usefulness of the review; limited generalizability to LMIC; ; some evidence statements not supported by evidence cited.</p>                                                                                                                                                                                                                                                                                      |

**Jackson R, Johnson M, Campbell F, et al. Interventions on Control of Alcohol Price, Promotion and Availability for Prevention of Alcohol Use Disorders in Adults and Young People. Sheffield: School of Health and Related Research, University of Sheffield, 2010.**

|                                                                                                   |                                                                                                                                                                                                                                                                                                   |
|---------------------------------------------------------------------------------------------------|---------------------------------------------------------------------------------------------------------------------------------------------------------------------------------------------------------------------------------------------------------------------------------------------------|
| Type of review/ publication                                                                       | - review of reviews; narrative review.<br>- report                                                                                                                                                                                                                                                |
| Was an 'a priori' design provided?                                                                | No                                                                                                                                                                                                                                                                                                |
| Was there duplicate study selection and data extraction?                                          | Unclear                                                                                                                                                                                                                                                                                           |
| Was a comprehensive literature search performed?                                                  | Unclear; search not clearly described.<br>- databases: unclear<br>- year /month of last search: unclear<br>- # of studies included: unclear (at least 4 reviews seem to have been examined: Fogarty 2006; Gallet, 2007; Booth, Brennan, et al., 2008; Wagenaar, Salois, Komro, 2009)<br>- LMIC: 0 |
| Was the status of publication (i.e. grey literature) used as an inclusion criterion?              | Unclear                                                                                                                                                                                                                                                                                           |
| Was a list of studies (included and excluded) provided?                                           | No, only a list of included studies is provided.                                                                                                                                                                                                                                                  |
| Were the characteristics of the included studies provided?                                        | To some extent; research objective, setting and study population, interventions and comparators, and main findings are briefly described.                                                                                                                                                         |
| Was the scientific quality of the included studies assessed and documented?                       | A quality checklist for reviews was developed. A subjective cut-off score of 9 criteria fulfilled (out of a total of 14) was deemed of higher quality. Assessment not provided; only 3 broad quality scores provided.                                                                             |
| Was the scientific quality of the included studies used appropriately in formulating conclusions? | Unclear                                                                                                                                                                                                                                                                                           |
| Were the methods used to combine the findings of studies appropriate?                             | n/a                                                                                                                                                                                                                                                                                               |
| Was the likelihood of publication bias assessed?                                                  | n/a                                                                                                                                                                                                                                                                                               |
| Funding, conflicts of interest reported?                                                          | - Review: yes; Centre for Public Health Excellence, National Institute for Health and Clinical Excellence;<br>- Included studies: no.                                                                                                                                                             |

|                            |                                                                                                                                                                                                                                                                                                                                                                                                                                                                                                                                                                             |
|----------------------------|-----------------------------------------------------------------------------------------------------------------------------------------------------------------------------------------------------------------------------------------------------------------------------------------------------------------------------------------------------------------------------------------------------------------------------------------------------------------------------------------------------------------------------------------------------------------------------|
| Results                    | <p>Only broad results presented:</p> <ul style="list-style-type: none"> <li>- a clear relationship between price / tax increases and reductions in the demand for alcohol;</li> <li>- some evidence that young people, binge drinkers and harmful drinkers tended to show a preference for cheaper drinks;</li> <li>- limited evidence that minimum pricing may be effective in reducing alcohol consumption;</li> <li>- one meta-regression analysis suggested that the higher the relative market share of a beverage, the more inelastic the consumer demand.</li> </ul> |
| Study's conclusion         | Clear relationship between price / tax increases and reductions in the demand for alcohol.                                                                                                                                                                                                                                                                                                                                                                                                                                                                                  |
| Limitations / risk of bias | Unclear search strategy; limited quality assessment; overly broad conclusions; limited generalizability to LMIC.                                                                                                                                                                                                                                                                                                                                                                                                                                                            |

**Martineau F, Tyner E, Lorenc T, Petticrew M, Lock K. Population-level interventions to reduce alcohol-related harm: an overview of systematic reviews. *Prev Med* 2013; 57(4): 278-96.**

|                                                                                                   |                                                                                                                                                                                                                                                                                           |
|---------------------------------------------------------------------------------------------------|-------------------------------------------------------------------------------------------------------------------------------------------------------------------------------------------------------------------------------------------------------------------------------------------|
| Type of review / publication                                                                      | - review of reviews<br>- journal: Preventive medicine                                                                                                                                                                                                                                     |
| Was an 'a priori' design provided?                                                                | Yes                                                                                                                                                                                                                                                                                       |
| Was there duplicate study selection and data extraction?                                          | Yes                                                                                                                                                                                                                                                                                       |
| Was a comprehensive literature search performed?                                                  | Yes<br>- databases: MEDLINE, Embase, Cochrane, Social Policy and Practice, DARE, Campbell and NICE;<br>- Year / month of last search: October 2012;<br>- # of studies included: 3 (Booth et al., 2008; Elder et al., 2010; Jackson et al., 2010)<br>- LMIC: 0                             |
| Was the status of publication (i.e. grey literature) used as an inclusion criterion?              | Unclear                                                                                                                                                                                                                                                                                   |
| Was a list of studies (included and excluded) provided?                                           | No, only a list of included studies is provided.                                                                                                                                                                                                                                          |
| Were the characteristics of the included studies provided?                                        | Yes; broad characteristics of included reviews are provided (review aim, type of review, year of search, primary / secondary outcome measures, # of individual studies, main findings).                                                                                                   |
| Was the scientific quality of the included studies assessed and documented?                       | The quality of the reporting was assessed using the AMSTAR tool; assessment not provided; only broad quality scores (high, mid, low) provided.                                                                                                                                            |
| Was the scientific quality of the included studies used appropriately in formulating conclusions? | Unclear                                                                                                                                                                                                                                                                                   |
| Were the methods used to combine the findings of studies appropriate?                             | n/a                                                                                                                                                                                                                                                                                       |
| Was the likelihood of publication bias assessed?                                                  | n/a                                                                                                                                                                                                                                                                                       |
| Funding, conflicts of interest reported?                                                          | - Review: yes. National Institute for Health Research (NIHR)'s School for Public Health Research (SPHR);<br>- Included studies: no.                                                                                                                                                       |
| Results                                                                                           | Overview of 3 reviews suggested that there was clear and consistent evidence that increasing alcohol price or taxation reduced overall consumption; one review indicated that a 10% increase in alcohol prices would lead to a 3-10% reduction in total consumption (Elder et al., 2010). |
| Study's conclusion                                                                                | Clear and consistent evidence that increasing alcohol price or taxation reduces overall consumption.                                                                                                                                                                                      |

|                          |                                                                                                                           |
|--------------------------|---------------------------------------------------------------------------------------------------------------------------|
| Limitations/risk of bias | Small number of reviews included; overly broad conclusions; limited quality assessment; limited generalizability to LMIC. |
|--------------------------|---------------------------------------------------------------------------------------------------------------------------|

**Stockings E, Hall WD, Lynskey M, et al. Prevention, early intervention, harm reduction, and treatment of substance use in young people. Lancet Psychiatry 2016; 3(3): 280-96.**

|                                                                                                   |                                                                                                                                                                                                                                                                                                                                                                                                                                                                                                      |
|---------------------------------------------------------------------------------------------------|------------------------------------------------------------------------------------------------------------------------------------------------------------------------------------------------------------------------------------------------------------------------------------------------------------------------------------------------------------------------------------------------------------------------------------------------------------------------------------------------------|
| Type of review / publication                                                                      | - review of reviews<br>- journal: Lancet Psychiatry                                                                                                                                                                                                                                                                                                                                                                                                                                                  |
| Was an 'a priori' design provided?                                                                | No                                                                                                                                                                                                                                                                                                                                                                                                                                                                                                   |
| Was there duplicate study selection and data extraction?                                          | Unclear                                                                                                                                                                                                                                                                                                                                                                                                                                                                                              |
| Was a comprehensive literature search performed?                                                  | Yes.<br>- databases: Project Cork bibliographies, Medline, Embase, PsycINFO, Cochrane.<br>- Year / month of last search: April 2015;<br>- # of studies included: 2 (Martineau et al., 2013, Elder et al. 2010)<br>- LMIC: 0                                                                                                                                                                                                                                                                          |
| Was the status of publication (i.e. grey literature) used as an inclusion criterion?              | Unclear.                                                                                                                                                                                                                                                                                                                                                                                                                                                                                             |
| Was a list of studies (included and excluded) provided?                                           | No                                                                                                                                                                                                                                                                                                                                                                                                                                                                                                   |
| Were the characteristics of the included studies provided?                                        | No                                                                                                                                                                                                                                                                                                                                                                                                                                                                                                   |
| Was the scientific quality of the included studies assessed and documented?                       | No                                                                                                                                                                                                                                                                                                                                                                                                                                                                                                   |
| Was the scientific quality of the included studies used appropriately in formulating conclusions? | n/a                                                                                                                                                                                                                                                                                                                                                                                                                                                                                                  |
| Were the methods used to combine the findings of studies appropriate?                             | n/a                                                                                                                                                                                                                                                                                                                                                                                                                                                                                                  |
| Was the likelihood of publication bias assessed?                                                  | n/a                                                                                                                                                                                                                                                                                                                                                                                                                                                                                                  |
| Funding, conflicts of interest reported?                                                          | - Review: yes. Authors / research centres were supported by a number of funding agencies including the Australian National Health and Medical Research Council (NHMRC), the National Drug and Alcohol Research Centre, University of New South Wales (UNSW), the Graeme Wood Foundation, University of Queensland, the National Institute for Health Research (NIHR) Biomedical Research Centre for Mental Health, the Maudsley National Health Service Foundation Trust.<br>- Included studies: no. |

|                          |                                                                                                                                                                                                                                                                                                                                                                                                                                                      |
|--------------------------|------------------------------------------------------------------------------------------------------------------------------------------------------------------------------------------------------------------------------------------------------------------------------------------------------------------------------------------------------------------------------------------------------------------------------------------------------|
| Results                  | <p>Only broad results presented:</p> <ul style="list-style-type: none"> <li>- increasing alcohol taxation or alcohol price reduced overall alcohol consumption, with a 10% increase in alcohol prices producing a 3-10% reduction in consumption (Elder et al., 2010);</li> <li>- scarce evidence regarding the effect of increased taxation on problematic alcohol use;</li> <li>- young people no more or less responsive to price/tax.</li> </ul> |
| Study's conclusion       | <p>Structural policy interventions (namely taxation, and controls on the minimum legal age and availability) seem to be most effective at reducing alcohol consumption.</p>                                                                                                                                                                                                                                                                          |
| Limitations/risk of bias | <p>Small number of reviews included; overly broad conclusions; no quality assessment; limited generalizability to LMIC.</p>                                                                                                                                                                                                                                                                                                                          |



**Burton R, Henn C, Lavoie D, et al. A rapid evidence review of the effectiveness and cost-effectiveness of alcohol control policies: an English perspective. Lancet 2017; 389(10078): 1558-80.**

|                                                                                                   |                                                                                                                                                                                                                                                                                                              |
|---------------------------------------------------------------------------------------------------|--------------------------------------------------------------------------------------------------------------------------------------------------------------------------------------------------------------------------------------------------------------------------------------------------------------|
| Type of review / publication                                                                      | - review of reviews<br>- journal: Lancet                                                                                                                                                                                                                                                                     |
| Was an 'a priori' design provided?                                                                | No                                                                                                                                                                                                                                                                                                           |
| Was there duplicate study selection and data extraction?                                          | No                                                                                                                                                                                                                                                                                                           |
| Was a comprehensive literature search performed?                                                  | No<br>- databases: MEDLINE; Pubmed.<br>- Year / month of last search: 2016, month not reported.<br>- # of studies included: 7 reviews (Anderson et al., 2009; Dhalwani, 2011; Elder et al., 2010; Fogarty, 2010; OECD, 2015, Wagenaar et al., 2009, Xu, Chaloupka, 2011), 2 individual studies;<br>- LMIC: 0 |
| Was the status of publication (i.e. grey literature) used as an inclusion criterion?              | Unclear                                                                                                                                                                                                                                                                                                      |
| Was a list of studies (included and excluded) provided?                                           | No                                                                                                                                                                                                                                                                                                           |
| Were the characteristics of the included studies provided?                                        | No; a data extraction was template was used (reference, aims, design/setting, population, intervention/exposure, country, outcomes, results, conclusions, strengths, limitations, inequalities, costs, recommendations) but no data were presented.                                                          |
| Was the scientific quality of the included studies assessed and documented?                       | Quality of evidence was assessed using the Grading of Recommendations, Assessment, Development, and Evaluation (GRADE) criteria. Unclear if the quality of individual studies were assessed beyond their design (e.g., systematic review, RCT, ...).                                                         |
| Was the scientific quality of the included studies used appropriately in formulating conclusions? | Yes                                                                                                                                                                                                                                                                                                          |
| Were the methods used to combine the findings of studies appropriate?                             | n/a                                                                                                                                                                                                                                                                                                          |
| Was the likelihood of publication bias assessed?                                                  | n/a                                                                                                                                                                                                                                                                                                          |
| Funding, conflicts of interest reported?                                                          | - Review: yes; Public Health England<br>- Included studies: no.                                                                                                                                                                                                                                              |

|                          |                                                                                                                                                                                                                                                                                                                                                                                                                                       |
|--------------------------|---------------------------------------------------------------------------------------------------------------------------------------------------------------------------------------------------------------------------------------------------------------------------------------------------------------------------------------------------------------------------------------------------------------------------------------|
| Results                  | <p>Only broad results presented:</p> <ul style="list-style-type: none"> <li>- Taxation</li> <li>- increased tax was associated with a proportionate reduction in alcohol consumption;</li> <li>- all alcohol drinkers can be targeted at beverage types;</li> <li>- Minimum pricing</li> <li>- applies only to alcohol which is cheap relative to its strength; moderate drinkers and the on-trade are minimally affected.</li> </ul> |
| Study's conclusion       | <p>Increasing tax is a highly effective and cost-effective approach to health improvement. Minimum prices effectively reduces health and other harms, is targeted at the heaviest drinkers who experience the greatest harm, and is cost-effective.</p>                                                                                                                                                                               |
| Limitations/risk of bias | <p>Search strategy poorly described and not comprehensive; broad conclusions; unclear quality assessment of individual studies; limited generalizability to LMIC.</p>                                                                                                                                                                                                                                                                 |

**Siegfried N, Parry C. Do alcohol control policies work? An umbrella review and quality assessment of systematic reviews of alcohol control interventions (2006 - 2017). PLoS One 2019; 14(4): e0214865.**

|                                                                                                   |                                                                                                                                                                                                                                                                                                                                                            |
|---------------------------------------------------------------------------------------------------|------------------------------------------------------------------------------------------------------------------------------------------------------------------------------------------------------------------------------------------------------------------------------------------------------------------------------------------------------------|
| Type of review / publication                                                                      | - review of reviews<br>- journal: PLoS One                                                                                                                                                                                                                                                                                                                 |
| Was an 'a priori' design provided?                                                                | Yes                                                                                                                                                                                                                                                                                                                                                        |
| Was there duplicate study selection and data extraction?                                          | Yes                                                                                                                                                                                                                                                                                                                                                        |
| Was a comprehensive literature search performed?                                                  | Yes<br>- databases: PubMed, Embase, and The Cochrane Library<br>- Year/ month of last search: July 2017<br>- # of studies included: 7 reviews (Wagenaar, Salois, Komro, 2009; Elder, Lawrence, et al., 2010; Korczak, Steinhauser, Dietl, 2011; Li, Babor, et al., 2015; Nelson, 2015; Boniface, Scannell, et al, 2017; Nelson, McNall, 2017)<br>- LMIC: 0 |
| Was the status of publication (i.e. grey literature) used as an inclusion criterion?              | Yes                                                                                                                                                                                                                                                                                                                                                        |
| Was a list of studies (included and excluded) provided?                                           | No; only a list of included studies is provided.                                                                                                                                                                                                                                                                                                           |
| Were the characteristics of the included studies provided?                                        | Yes; number and type of included studies; publication limits; language limits; ROBIS (Risk of Bias Assessment Tool for Systematic Reviews) domains.                                                                                                                                                                                                        |
| Was the scientific quality of the included studies assessed and documented?                       | Four ROBIS (Risk of Bias Assessment Tool for Systematic Reviews) domains were used (1) study eligibility criteria; 2) identification and selection of studies; 3) data collection and study appraisal; and 4) synthesis and findings. Only broad scores are presented (high, low or uncertain) without any details.                                        |
| Was the scientific quality of the included studies used appropriately in formulating conclusions? | Yes                                                                                                                                                                                                                                                                                                                                                        |
| Were the methods used to combine the findings of studies appropriate?                             | n/a                                                                                                                                                                                                                                                                                                                                                        |
| Was the likelihood of publication bias assessed?                                                  | n/a                                                                                                                                                                                                                                                                                                                                                        |
| Funding, conflicts of interest reported?                                                          | - Review: yes; Alcohol, Tobacco and Other Drug Research Unit of the South African Medical Research Council (SAMRC).<br>- Included studies: no                                                                                                                                                                                                              |

|                          |                                                                                                                                                                                                                                                                                                                                                                                                                                                                                                                                                                                                                                                                                                                        |
|--------------------------|------------------------------------------------------------------------------------------------------------------------------------------------------------------------------------------------------------------------------------------------------------------------------------------------------------------------------------------------------------------------------------------------------------------------------------------------------------------------------------------------------------------------------------------------------------------------------------------------------------------------------------------------------------------------------------------------------------------------|
| Results                  | <p>Only broad results presented.</p> <ul style="list-style-type: none"> <li>- The evidence for “increased pricing and taxation” was assessed as “possibly beneficial,” with a recommendation for “revision with adequate quality assessment, meta-analysis and regression where possible to account for the potential confounders, and integration of the overall quality into the interpretation of the results.” Unclear what was meant by “beneficial.”</li> <li>- The evidence for “price only (minimum unit pricing)” was assessed, based on a single review as “possibly beneficial” with recommendations that further implementation of minimum unit pricing occur within a monitoring environment.”</li> </ul> |
| Study's conclusion       | No clear conclusion reported.                                                                                                                                                                                                                                                                                                                                                                                                                                                                                                                                                                                                                                                                                          |
| Limitations/risk of bias | Small number of reviews included; included studies limited to those reported between 2006 and 2017; limited reporting of quality assessment of individual studies; overly broad presentations of results; no clear conclusion reported; limited generalizability to LMIC.                                                                                                                                                                                                                                                                                                                                                                                                                                              |

## Appendix 5. Characteristics of included reviews

**Ornstein SI. Control of alcohol consumption through price increase. J Stud Alcohol 1980; 41(9): 807-18.**

|                                                                                                   |                                                                                                                                                                                                                                                                                                                          |
|---------------------------------------------------------------------------------------------------|--------------------------------------------------------------------------------------------------------------------------------------------------------------------------------------------------------------------------------------------------------------------------------------------------------------------------|
| Type of review/ publication                                                                       | - narrative review<br>- journal: J Stud Alcohol                                                                                                                                                                                                                                                                          |
| Was an 'a priori' design provided?                                                                | No                                                                                                                                                                                                                                                                                                                       |
| Was there duplicate study selection and data extraction?                                          | No                                                                                                                                                                                                                                                                                                                       |
| Was a comprehensive literature search performed?                                                  | Unclear; search not reported;<br>- databases: not reported;<br>- Year/month of last search: not reported;<br>- # of studies included: 23<br>- LMIC: 0                                                                                                                                                                    |
| Was the status of publication (i.e. grey literature) used as an inclusion criterion?              | Yes                                                                                                                                                                                                                                                                                                                      |
| Was a list of studies (included and excluded) provided?                                           | No                                                                                                                                                                                                                                                                                                                       |
| Were the characteristics of the included studies provided?                                        | Yes; data (place and time); estimation method; price and income elasticities.                                                                                                                                                                                                                                            |
| Was the scientific quality of the included studies assessed and documented?                       | To some extent; the quality of individual studies was generally discussed throughout; some studies dismissed because of quality concerns. No formal quality assessment approach/tool used; useful critical review of econometric techniques used in individual studies, with suggestion to interpret results cautiously. |
| Was the scientific quality of the included studies used appropriately in formulating conclusions? | Yes                                                                                                                                                                                                                                                                                                                      |
| Were the methods used to combine the findings of studies appropriate?                             | n/a                                                                                                                                                                                                                                                                                                                      |
| Was the likelihood of publication bias assessed?                                                  | n/a                                                                                                                                                                                                                                                                                                                      |
| Funding, conflicts of interest reported?                                                          | - Review: yes; California Department of Alcohol and Drug Abuse; UCLA.<br>- Included studies: no.                                                                                                                                                                                                                         |
| Results                                                                                           | Total own-price elasticities:<br>- beer: -0.3 to -0.9, all statistically significant;<br>- wine: wide variation between countries, generally inelastic;<br>- spirits: most studies generally weak; best estimate, unitary elastic;<br>Cross-price elasticities:<br>- no consistency in findings across studies.          |

|                          |                                                                                                                                                                                                                                                                                                                                                                                                                                                                                                                                                                           |
|--------------------------|---------------------------------------------------------------------------------------------------------------------------------------------------------------------------------------------------------------------------------------------------------------------------------------------------------------------------------------------------------------------------------------------------------------------------------------------------------------------------------------------------------------------------------------------------------------------------|
| Study's conclusion       | <ol style="list-style-type: none"> <li>1) an increase in the price of beer, ceteris paribus will likely lead to a substantially less than proportional decline in beer consumption;</li> <li>2) an increase in the price of distilled spirits ceteris paribus will likely lead to a proportional or somewhat greater than proportional decline in distilled spirits;</li> <li>3) in the case of wine, the results are too unreliable to offer any conclusions;</li> <li>4) no consistency in findings across studies with respect to cross-price elasticities.</li> </ol> |
| Limitations/risk of bias | Search strategy not described; criteria for quality assessment could be more explicit; limited generalizability to LMIC.                                                                                                                                                                                                                                                                                                                                                                                                                                                  |

**Ornstein SI, Levy D. Price and income elasticities of demand for alcoholic beverages. *Recent Dev Alcohol* 1983; 1: 303-45.**

|                                                                                                   |                                                                                                                                                                                                                                                                                                                            |
|---------------------------------------------------------------------------------------------------|----------------------------------------------------------------------------------------------------------------------------------------------------------------------------------------------------------------------------------------------------------------------------------------------------------------------------|
| Type of review / publication                                                                      | - narrative review<br>- book section                                                                                                                                                                                                                                                                                       |
| Was an 'a priori' design provided?                                                                | No                                                                                                                                                                                                                                                                                                                         |
| Was there duplicate study selection and data extraction?                                          | No                                                                                                                                                                                                                                                                                                                         |
| Was a comprehensive literature search performed?                                                  | Unclear; search not reported.<br>- databases: not reported<br>- Year / month of last search: not reported;<br>- # of studies included: 23<br>- LMIC: 0                                                                                                                                                                     |
| Was the status of publication (i.e. grey literature) used as an inclusion criterion?              | Yes.                                                                                                                                                                                                                                                                                                                       |
| Was a list of studies (included and excluded) provided?                                           | No                                                                                                                                                                                                                                                                                                                         |
| Were the characteristics of the included studies provided?                                        | Yes; data (place and time); estimation method; price and income elasticities.                                                                                                                                                                                                                                              |
| Was the scientific quality of the included studies assessed and documented?                       | To some extent; the quality of individual studies was generally discussed throughout; some studies dismissed because of quality concerns. No formal quality assessment approach / tool used; useful critical review of econometric techniques used in individual studies, with suggestion to interpret results cautiously. |
| Was the scientific quality of the included studies used appropriately in formulating conclusions? | Yes                                                                                                                                                                                                                                                                                                                        |
| Were the methods used to combine the findings of studies appropriate?                             | n/a                                                                                                                                                                                                                                                                                                                        |
| Was the likelihood of publication bias assessed?                                                  | n/a                                                                                                                                                                                                                                                                                                                        |
| Funding, conflicts of interest reported?                                                          | - Review: yes; California Department of Alcohol and Drug Abuse; UCLA;<br>- Included studies: no.                                                                                                                                                                                                                           |
| Results                                                                                           | See Ornstein, 1980                                                                                                                                                                                                                                                                                                         |
| Study's conclusion                                                                                | See Ornstein, 1980                                                                                                                                                                                                                                                                                                         |
| Limitations / risk of bias                                                                        | See Ornstein, 1980                                                                                                                                                                                                                                                                                                         |

**Leung SF, Phelps CE. My kingdom for a drink ...? A review of estimates of the price sensitivity of demand for alcoholic beverages. In: Hilton ME, Bloss G, eds. Economics and the Prevention of Alcohol-Related Problems NIAAA Research Monograph No 25 NIH Pub No 93-3513. Bethesda, MD: National Institute on Alcohol Abuse and Alcoholism; 1993: 1-31.**

|                                                                                                   |                                                                                                                                                                                                                                             |
|---------------------------------------------------------------------------------------------------|---------------------------------------------------------------------------------------------------------------------------------------------------------------------------------------------------------------------------------------------|
| Type of review / publication                                                                      | - narrative review<br>- report                                                                                                                                                                                                              |
| Was an 'a priori' design provided?                                                                | No                                                                                                                                                                                                                                          |
| Was there duplicate study selection and data extraction?                                          | No                                                                                                                                                                                                                                          |
| Was a comprehensive literature search performed?                                                  | Unclear; search not reported;<br>- databases: not reported;<br>- Year/month of last search: not reported;<br>- # of studies included: 21;<br>- LMIC: 0                                                                                      |
| Was the status of publication (i.e. grey literature) used as an inclusion criterion?              | Yes                                                                                                                                                                                                                                         |
| Was a list of studies (included and excluded) provided?                                           | No; list of excluded studies not provided.                                                                                                                                                                                                  |
| Were the characteristics of the included studies provided?                                        | Yes; data (place and time); estimation method; price and income elasticities.                                                                                                                                                               |
| Was the scientific quality of the included studies assessed and documented?                       | To some extent; the quality of individual studies was generally discussed throughout. No formal quality assessment approach/tool used; useful critical review of data, study design, and econometric techniques used in individual studies. |
| Was the scientific quality of the included studies used appropriately in formulating conclusions? | Yes                                                                                                                                                                                                                                         |
| Were the methods used to combine the findings of studies appropriate?                             | n/a                                                                                                                                                                                                                                         |
| Was the likelihood of publication bias assessed?                                                  | n/a                                                                                                                                                                                                                                         |
| Funding, conflicts of interest reported?                                                          | - Review: yes; US National Institute on Alcohol Abuse and Alcoholism.<br>- Included studies: no.                                                                                                                                            |



|                          |                                                                                                                                                                                                                                                                                                                                                                                                                                                                                                                                                                                       |
|--------------------------|---------------------------------------------------------------------------------------------------------------------------------------------------------------------------------------------------------------------------------------------------------------------------------------------------------------------------------------------------------------------------------------------------------------------------------------------------------------------------------------------------------------------------------------------------------------------------------------|
| Results                  | <p>Total own-price elasticities*:</p> <ul style="list-style-type: none"> <li>- beer: -0.3</li> <li>- wine: -1</li> <li>- spirits: -1.5</li> </ul> <p>* based on studies that employed aggregate data; studies that employed individual-level data tended to find higher total own-price elasticities</p> <p>Cross-price elasticities:</p> <ul style="list-style-type: none"> <li>- no consistency in findings across studies;</li> </ul> <p>Too few studies reported participation and consumption elasticities or elasticities between groups to make any conclusive statements.</p> |
| Study's conclusion       | <p>Wide degree of disagreement about the price responsiveness of demand for alcoholic beverages; improvements in econometric estimation techniques needed; need for better quality data.</p>                                                                                                                                                                                                                                                                                                                                                                                          |
| Limitations/risk of bias | <p>Search strategy not described; criteria for quality assessment could be more explicit; limited generalizability to LMIC.</p>                                                                                                                                                                                                                                                                                                                                                                                                                                                       |

Edwards G, Anderson P, Babor TF, et al. Alcohol policy and the public good. Oxford: Oxford University Press; 1994.

|                                                                                                   |                                                                                                                                                                                                                                                                                                                               |
|---------------------------------------------------------------------------------------------------|-------------------------------------------------------------------------------------------------------------------------------------------------------------------------------------------------------------------------------------------------------------------------------------------------------------------------------|
| Type of review / publication                                                                      | - narrative review<br>- WHO report                                                                                                                                                                                                                                                                                            |
| Was an 'a priori' design provided?                                                                | No                                                                                                                                                                                                                                                                                                                            |
| Was there duplicate study selection and data extraction?                                          | No                                                                                                                                                                                                                                                                                                                            |
| Was a comprehensive literature search performed?                                                  | No; search does not appear to be systematic;<br>- databases: not reported;<br>- Year / month of last search: unclear;<br>- # of studies included: 46<br>- LMIC: 1 (Partanen, 1991 - Kenya)                                                                                                                                    |
| Was the status of publication (i.e. grey literature) used as an inclusion criterion?              | Unclear                                                                                                                                                                                                                                                                                                                       |
| Was a list of studies (included and excluded) provided?                                           | No; list of excluded studies not provided.                                                                                                                                                                                                                                                                                    |
| Were the characteristics of the included studies provided?                                        | No; only the year and country were reported.                                                                                                                                                                                                                                                                                  |
| Was the scientific quality of the included studies assessed and documented?                       | No                                                                                                                                                                                                                                                                                                                            |
| Was the scientific quality of the included studies used appropriately in formulating conclusions? | Unclear                                                                                                                                                                                                                                                                                                                       |
| Were the methods used to combine the findings of studies appropriate?                             | n/a                                                                                                                                                                                                                                                                                                                           |
| Was the likelihood of publication bias assessed?                                                  | n/a                                                                                                                                                                                                                                                                                                                           |
| Funding, conflicts of interest reported?                                                          | - Review: yes; Addiction Research Foundation (Toronto, ON, Canada); Department of Health (London, UK); Finnish Foundation for Alcohol Studies (Helsinki, Finland); National Institute for Drug and Alcohol Research (Oslo, Norway); Society for the Study of Addiction (London, UK); WHO (Europe);<br>- Included studies: no. |

|                          |                                                                                                                                                                                                                                                                                                                                                                                                                                                                                                                                       |
|--------------------------|---------------------------------------------------------------------------------------------------------------------------------------------------------------------------------------------------------------------------------------------------------------------------------------------------------------------------------------------------------------------------------------------------------------------------------------------------------------------------------------------------------------------------------------|
| Results                  | <p>Only broad results presented:<br/> No average results provided; a description of the main results were discussed by countries and range of elasticities were provided:</p> <ul style="list-style-type: none"> <li>- English-speaking countries had a demand for beer that was less price elastic than the one for wines and spirits;</li> <li>- Heavy and dependent drinkers were at least as responsive to price as moderate drinkers;</li> <li>- Cross-price elasticities between beverage type were generally small.</li> </ul> |
| Study's conclusion       | <p>Long term effects of price change may be more important than short term effects. Magnitude of elasticity depends on culture, legal situation, and economy. Larger swings in price affect consumption more. Heavy drinkers more responsive to price changes. Taxes should be used to increase the price of alcohol.</p>                                                                                                                                                                                                             |
| Limitations/risk of bias | <p>No quality assessment of included studies; no account for differing types of price elasticities (e.g., short-run, long-run, participation, consumption); no search strategy or proper discussion of results; results of the review do not support some of the proposed policy recommendations; limited generalizability to LMIC.</p>                                                                                                                                                                                               |

**Fogarty J. The nature of the demand for alcohol: understanding elasticity. British Food Journal 2006; 108(4): 316-32.**

|                                                                                                   |                                                                                                                                                                                                                                                                                                                                                                                                                 |
|---------------------------------------------------------------------------------------------------|-----------------------------------------------------------------------------------------------------------------------------------------------------------------------------------------------------------------------------------------------------------------------------------------------------------------------------------------------------------------------------------------------------------------|
| Type of review / publication                                                                      | - narrative review; meta-regression<br>- journal: British Food Journal                                                                                                                                                                                                                                                                                                                                          |
| Was an 'a priori' design provided?                                                                | No                                                                                                                                                                                                                                                                                                                                                                                                              |
| Was there duplicate study selection and data extraction?                                          | No                                                                                                                                                                                                                                                                                                                                                                                                              |
| Was a comprehensive literature search performed?                                                  | No; studies selected from Edward, Anderson et al., 1994.<br>- databases: not reported;<br>- Year / month of last search: unclear;<br>- # of studies included: 44<br>- LMIC: 1 (Partanen, 1991 - Kenya)                                                                                                                                                                                                          |
| Was the status of publication (i.e. grey literature) used as an inclusion criterion?              | Unclear                                                                                                                                                                                                                                                                                                                                                                                                         |
| Was a list of studies (included and excluded) provided?                                           | No; list of excluded studies not provided.                                                                                                                                                                                                                                                                                                                                                                      |
| Were the characteristics of the included studies provided?                                        | No                                                                                                                                                                                                                                                                                                                                                                                                              |
| Was the scientific quality of the included studies assessed and documented?                       | No                                                                                                                                                                                                                                                                                                                                                                                                              |
| Was the scientific quality of the included studies used appropriately in formulating conclusions? | n/a; no quality assessment conducted.                                                                                                                                                                                                                                                                                                                                                                           |
| Were the methods used to combine the findings of studies appropriate?                             | n/a                                                                                                                                                                                                                                                                                                                                                                                                             |
| Was the likelihood of publication bias assessed?                                                  | n/a                                                                                                                                                                                                                                                                                                                                                                                                             |
| Funding, conflicts of interest reported?                                                          | - Review: no.<br>- Included studies: no.                                                                                                                                                                                                                                                                                                                                                                        |
| Results                                                                                           | Mean (95%CI); median total own-price elasticities:<br>- beer: -0.38 (-0.46, -0.30); -0.28<br>- wine: -0.77 (-0.89, -0.65); -0.59<br>- spirits: -0.70 (-0.84, -0.56), -0.59<br><br>Mean, and median own-price elasticities appear to be calculated without any distinction between price- and tax-elasticities, between short- and long-run price elasticities and include multiple estimates from same studies. |

|                          |                                                                                                                                                                                                                                                                                                                                         |
|--------------------------|-----------------------------------------------------------------------------------------------------------------------------------------------------------------------------------------------------------------------------------------------------------------------------------------------------------------------------------------|
| Study's conclusion       | <p>No overall conclusive statement regarding the impact of prices or taxes on alcohol use:</p> <ul style="list-style-type: none"> <li>- consumer responses to changes in the price of alcoholic beverages do not vary between countries;</li> <li>- higher levels of consumption were associated with more inelastic demand.</li> </ul> |
| Limitations/risk of bias | <p>Non-systematic search strategy; study characteristics not presented; no quality assessment of included studies; no account for differing types of price elasticities (e.g., short-run, long-run, participation, consumption); limited generalizability to LMIC.</p>                                                                  |

**Gallet CA. The demand for alcohol: a meta-analysis of elasticities. Australian Journal of Agricultural and Resource Economics 2007; 51(2): 121-35.**

|                                                                                                   |                                                                                                                                                                                                                                                                                                                                                                                                                                                                                          |
|---------------------------------------------------------------------------------------------------|------------------------------------------------------------------------------------------------------------------------------------------------------------------------------------------------------------------------------------------------------------------------------------------------------------------------------------------------------------------------------------------------------------------------------------------------------------------------------------------|
| Type of review / publication                                                                      | - narrative review; meta-regression<br>- journal: Australian Journal of Agricultural and Resource Economics                                                                                                                                                                                                                                                                                                                                                                              |
| Was an 'a priori' design provided?                                                                | No                                                                                                                                                                                                                                                                                                                                                                                                                                                                                       |
| Was there duplicate study selection and data extraction?                                          | No                                                                                                                                                                                                                                                                                                                                                                                                                                                                                       |
| Was a comprehensive literature search performed?                                                  | Unclear.; search not clearly described;<br>- databases: EconLit<br>- Year / month of last search: unclear;<br>- # of studies included: unclear (132 studies that examined price, income or advertising elasticities)<br>- LMIC: 1 (Musgrave, Stern 1988 -Karnataka, India)                                                                                                                                                                                                               |
| Was the status of publication (i.e. grey literature) used as an inclusion criterion?              | Yes                                                                                                                                                                                                                                                                                                                                                                                                                                                                                      |
| Was a list of studies (included and excluded) provided?                                           | No; list of excluded studies not provided.                                                                                                                                                                                                                                                                                                                                                                                                                                               |
| Were the characteristics of the included studies provided?                                        | No                                                                                                                                                                                                                                                                                                                                                                                                                                                                                       |
| Was the scientific quality of the included studies assessed and documented?                       | No quality assessment approach / tool used. Information collected on several common traits of studies, which covered a broad range of attributes, including the type of elasticity estimate, the beverage to which the elasticity applied, serial correlation, heteroscedasticity, the specification of demand, the nature of the data, estimation techniques used, year of publication and quality of the publication outlet. A criticism for some of these study traits were discussed |
| Was the scientific quality of the included studies used appropriately in formulating conclusions? | n/a; no formal quality assessment conducted.                                                                                                                                                                                                                                                                                                                                                                                                                                             |
| Were the methods used to combine the findings of studies appropriate?                             | n/a                                                                                                                                                                                                                                                                                                                                                                                                                                                                                      |
| Was the likelihood of publication bias assessed?                                                  | n/a                                                                                                                                                                                                                                                                                                                                                                                                                                                                                      |
| Funding, conflicts of interest reported?                                                          | - Review: no;<br>- Included studies: no.                                                                                                                                                                                                                                                                                                                                                                                                                                                 |

|                          |                                                                                                                                                                                                                                                                                                                                                                                                                                                                                                         |
|--------------------------|---------------------------------------------------------------------------------------------------------------------------------------------------------------------------------------------------------------------------------------------------------------------------------------------------------------------------------------------------------------------------------------------------------------------------------------------------------------------------------------------------------|
| Results                  | <p>Total median own-price elasticities</p> <ul style="list-style-type: none"> <li>- all, short-run: -0.52</li> <li>- all, long-run: -0.82</li> <li>- beer: -0.36</li> <li>- wine: -0.70</li> <li>- spirits: -0.68</li> <li>- alcohol (composite of beer, wine, spirits): -0.50</li> </ul> <p>No specific distinction made by type of own-price elasticities, and between subgroups; unable to disentangle policy-relevant effects. Tax elasticities appear to be treated as own-price elasticities.</p> |
| Study's conclusion       | <p>No overall conclusive statement regarding the impact of prices or taxes on alcohol use.</p> <ul style="list-style-type: none"> <li>- elasticity estimates are sensitive to a variety of factors;</li> <li>- beer more price inelastic relative to wine and spirits;</li> <li>- teens are least responsive to price.</li> </ul>                                                                                                                                                                       |
| Limitations/risk of bias | <p>Poorly described search strategy; study characteristics not clearly presented; no formal quality assessment of included studies; limited generalizability to LMIC.</p>                                                                                                                                                                                                                                                                                                                               |

**Booth A, Brennan A, Meier P, et al. Independent review of the effects of alcohol pricing and promotion: part a – systematic reviews. Sheffield: School of Health and Related Research, University of Sheffield, 2008.**

|                                                                                                   |                                                                                                                                                                                                                                                                                                                                                                                                                                                                                                                                                                                  |
|---------------------------------------------------------------------------------------------------|----------------------------------------------------------------------------------------------------------------------------------------------------------------------------------------------------------------------------------------------------------------------------------------------------------------------------------------------------------------------------------------------------------------------------------------------------------------------------------------------------------------------------------------------------------------------------------|
| Type of review/ publication                                                                       | - narrative review<br>- report                                                                                                                                                                                                                                                                                                                                                                                                                                                                                                                                                   |
| Was an 'a priori' design provided?                                                                | No                                                                                                                                                                                                                                                                                                                                                                                                                                                                                                                                                                               |
| Was there duplicate study selection and data extraction?                                          | Unclear (although likely).                                                                                                                                                                                                                                                                                                                                                                                                                                                                                                                                                       |
| Was a comprehensive literature search performed?                                                  | Unclear; search not clearly described;<br>- databases: Medline, Cochrane, DARE, HTA, NHS, PsycINFO, Cinahl, HMIC, SCI, SSCI, ASSIA, Social Service Abstracts, EPPI-Centre, EconLit, ERIC, British Education index, Association for Consumer Research, Chartered Institute of Marketing, EBSCO, Emerald Marketing Journals, WARC, DrugScope, and Project Cork;<br>- Year/month of last search: January 2008;<br>- # of studies included: 2 reviews (Wagenaar, Salois, Komro, 2009 and Gallet, 2007) + 15 additional individual studies.<br>- LMIC: 0 (from additional 15 studies) |
| Was the status of publication (i.e. grey literature) used as an inclusion criterion?              | Yes                                                                                                                                                                                                                                                                                                                                                                                                                                                                                                                                                                              |
| Was a list of studies (included and excluded) provided?                                           | No; list of excluded studies not provided.                                                                                                                                                                                                                                                                                                                                                                                                                                                                                                                                       |
| Were the characteristics of the included studies provided?                                        | Yes; broad characteristics of included reviews were provided (authors/country, study design, sample and interventions, methods, consumption outcomes, limitations and conclusions).                                                                                                                                                                                                                                                                                                                                                                                              |
| Was the scientific quality of the included studies assessed and documented?                       | Quality assessment was discussed but no information was provided as to how it was operationalized. Limitations for each study were provided.                                                                                                                                                                                                                                                                                                                                                                                                                                     |
| Was the scientific quality of the included studies used appropriately in formulating conclusions? | Unclear                                                                                                                                                                                                                                                                                                                                                                                                                                                                                                                                                                          |
| Were the methods used to combine the findings of studies appropriate?                             | n/a                                                                                                                                                                                                                                                                                                                                                                                                                                                                                                                                                                              |
| Was the likelihood of publication bias assessed?                                                  | n/a                                                                                                                                                                                                                                                                                                                                                                                                                                                                                                                                                                              |
| Funding, conflicts of interest reported?                                                          | - Review: Policy Research Programme, Department of Health, UK;<br>- Included studies: no.                                                                                                                                                                                                                                                                                                                                                                                                                                                                                        |



|                          |                                                                                                                                                                                                                                                                                                                                                                                           |
|--------------------------|-------------------------------------------------------------------------------------------------------------------------------------------------------------------------------------------------------------------------------------------------------------------------------------------------------------------------------------------------------------------------------------------|
| Results                  | <p>Only broad results presented.</p> <ul style="list-style-type: none"> <li>- own-price elasticity estimates highly variable, but consistently negative;</li> <li>- stronger effect for cheaper drinks;</li> <li>- scattered evidence suggest that price policies have a similar or stronger effect for at-risk groups (young, young adult binge drinkers and heavy drinkers).</li> </ul> |
| Study's conclusion       | <p>There is strong and consistent evidence to suggest that price increases (including through taxation) have a significant effect in reducing demand for alcohol.</p>                                                                                                                                                                                                                     |
| Limitations/risk of bias | <p>Only broad presentation of results (focus on direction of effect); unclear how quality assessment was operationalized; limited generalizability to LMIC.</p>                                                                                                                                                                                                                           |

**Wagenaar AC, Salois MJ, Komro KA. Effects of beverage alcohol price and tax levels on drinking: a meta-analysis of 1003 estimates from 112 studies. *Addiction* 2009; 104(2): 179-90.**

|                                                                                                   |                                                                                                                                                                                                                                                                                                                                                                                                                                                                           |
|---------------------------------------------------------------------------------------------------|---------------------------------------------------------------------------------------------------------------------------------------------------------------------------------------------------------------------------------------------------------------------------------------------------------------------------------------------------------------------------------------------------------------------------------------------------------------------------|
| Type of review / publication                                                                      | - meta-analysis;<br>- journal: <i>Addiction</i>                                                                                                                                                                                                                                                                                                                                                                                                                           |
| Was an 'a priori' design provided?                                                                | No                                                                                                                                                                                                                                                                                                                                                                                                                                                                        |
| Was there duplicate study selection and data extraction?                                          | No                                                                                                                                                                                                                                                                                                                                                                                                                                                                        |
| Was a comprehensive literature search performed?                                                  | Yes. Search clearly described and comprehensive.<br>- databases: AgEcon Search, Blackwell–Synergy, EBSCO Host (which encompasses EconLit), Academic Search Premier, Business Source Premier, PsychInfo, JSTOR, MEDLINE, Springer,, ScienceDirect, ISI Web of Knowledge, Wiley;<br>- Year /month of last search: not reported;<br>- # of studies included: unclear (112 but only 105 references could be identified)<br>- LMIC: 1 (Musgrave, Stern 1988 -Karnataka, India) |
| Was the status of publication (i.e. grey literature) used as an inclusion criterion?              | Yes                                                                                                                                                                                                                                                                                                                                                                                                                                                                       |
| Was a list of studies (included and excluded) provided?                                           | No; list of excluded studies not provided.                                                                                                                                                                                                                                                                                                                                                                                                                                |
| Were the characteristics of the included studies provided?                                        | No                                                                                                                                                                                                                                                                                                                                                                                                                                                                        |
| Was the scientific quality of the included studies assessed and documented?                       | No quality assessment approach / tool used. As a quality inclusion criterion, authors excluded from analysis empirical studies that did not provide sufficient data for calculating some form of numerical estimate of effect and estimate of its standard error. Sensitivity and robustness analyses to evaluate consistency of estimates across study characteristics was conducted.                                                                                    |
| Was the scientific quality of the included studies used appropriately in formulating conclusions? | No                                                                                                                                                                                                                                                                                                                                                                                                                                                                        |
| Were the methods used to combine the findings of studies appropriate?                             | Yes                                                                                                                                                                                                                                                                                                                                                                                                                                                                       |
| Was the likelihood of publication bias assessed?                                                  | No; not formally.                                                                                                                                                                                                                                                                                                                                                                                                                                                         |
| Funding, conflicts of interest reported?                                                          | - Review: Robert Wood Johnson Foundation.<br>- Included studies: no.                                                                                                                                                                                                                                                                                                                                                                                                      |

|                          |                                                                                                                                                                                                                                                                                                                                                                                                                                                                                                                                                                                                                                                                                                                                                                                                                                                                                                                                                                                                                                                                                             |
|--------------------------|---------------------------------------------------------------------------------------------------------------------------------------------------------------------------------------------------------------------------------------------------------------------------------------------------------------------------------------------------------------------------------------------------------------------------------------------------------------------------------------------------------------------------------------------------------------------------------------------------------------------------------------------------------------------------------------------------------------------------------------------------------------------------------------------------------------------------------------------------------------------------------------------------------------------------------------------------------------------------------------------------------------------------------------------------------------------------------------------|
| Results                  | <p>Pooled standardized effect sizes (95%CI)</p> <ul style="list-style-type: none"> <li>- aggregate-level:</li> <li>- alcohol -0.44 (-0.54, -0.34)</li> <li>- beer: -0.17 (-0.22, -0.12)</li> <li>- wine: -0.30 (-0.36, -0.23)</li> <li>- spirits: -0.29 (-0.34, -0.23)</li> <li>- individual-level</li> <li>- alcohol -0.03 (-0.05, -0.02)</li> <li>- beer: -0.12 (-0.22, -0.02)</li> <li>- wine: -0.14 (-0.26, -0.01)</li> <li>- spirits: -0.10 (-0.17, -0.02)</li> <li>- heavy drinking: -0.01 (-0.03, 0.00)</li> </ul> <p>Total simple mean own-price elasticities:</p> <ul style="list-style-type: none"> <li>- alcohol -0.51</li> <li>- beer: -0.46</li> <li>- wine: -0.69</li> <li>- spirits: -0.80</li> <li>- heavy drinking: -0.28</li> </ul> <p>Standardized effect sizes at aggregate-level were calculated from total own-price elasticities and combined short- and long run estimates. Unclear if standardized effect sizes at individual-level refer to participation or consumption own-price elasticities, or both; tax elasticities treated as own-price elasticities.</p> |
| Study's conclusion       | <p>Statistically overwhelming evidence of effects of alcohol prices on drinking; results across studies suggest that the magnitude of price effects varies across groups, situations and times.</p>                                                                                                                                                                                                                                                                                                                                                                                                                                                                                                                                                                                                                                                                                                                                                                                                                                                                                         |
| Limitations/risk of bias | <p>No quality assessment of included studies; no account for differing types of price elasticities (e.g., short-run, long-run, participation, consumption); pooled elasticity estimates not reported; limited generalizability to LMIC.</p>                                                                                                                                                                                                                                                                                                                                                                                                                                                                                                                                                                                                                                                                                                                                                                                                                                                 |

**Elder RW, Lawrence B, Ferguson A, et al. The effectiveness of tax policy interventions for reducing excessive alcohol consumption and related harms. Am J Prev Med 2010; 38(2): 217-29.**

|                                                                                                   |                                                                                                                                                                                                                                                                                                                                                                                                                                                                                                        |
|---------------------------------------------------------------------------------------------------|--------------------------------------------------------------------------------------------------------------------------------------------------------------------------------------------------------------------------------------------------------------------------------------------------------------------------------------------------------------------------------------------------------------------------------------------------------------------------------------------------------|
| Type of review / publication                                                                      | - narrative review<br>- journal: Am J Prev Med                                                                                                                                                                                                                                                                                                                                                                                                                                                         |
| Was an 'a priori' design provided?                                                                | Unclear                                                                                                                                                                                                                                                                                                                                                                                                                                                                                                |
| Was there duplicate study selection and data extraction?                                          | Unclear                                                                                                                                                                                                                                                                                                                                                                                                                                                                                                |
| Was a comprehensive literature search performed?                                                  | Yes.<br>- databases: MEDLINE, EMBASE, PsycINFO, ETOH, Web of Science, Sociological Abstracts, and EconLit;<br>- Year / month of last search: July 2005;<br>- # of studies included: 46<br>- LMIC: 0                                                                                                                                                                                                                                                                                                    |
| Was the status of publication (i.e. grey literature) used as an inclusion criterion?              | Yes                                                                                                                                                                                                                                                                                                                                                                                                                                                                                                    |
| Was a list of studies (included and excluded) provided?                                           | No; list of excluded studies not provided.                                                                                                                                                                                                                                                                                                                                                                                                                                                             |
| Were the characteristics of the included studies provided?                                        | No                                                                                                                                                                                                                                                                                                                                                                                                                                                                                                     |
| Was the scientific quality of the included studies assessed and documented?                       | Quality of study execution was assessed using a 9-point scale, reflecting the total number of limitations to internal or external validity (study population and intervention descriptions, sampling, exposure and outcome measurement, data analysis, interpretation of results, and other biases). Studies with 0 or 1 limitation were categorized as having good execution, those with 2 to 4 limitations as fair execution, and those with 5 or more were categorized as having limited execution. |
| Was the scientific quality of the included studies used appropriately in formulating conclusions? | Yes. 19 studies with "limited execution" were excluded from further analysis.                                                                                                                                                                                                                                                                                                                                                                                                                          |
| Were the methods used to combine the findings of studies appropriate?                             | n/a                                                                                                                                                                                                                                                                                                                                                                                                                                                                                                    |
| Was the likelihood of publication bias assessed?                                                  | n/a                                                                                                                                                                                                                                                                                                                                                                                                                                                                                                    |
| Funding, conflicts of interest reported?                                                          | - Review: Oak Ridge Institute for Scientific Education (ORISE).<br>- Included studies: no.                                                                                                                                                                                                                                                                                                                                                                                                             |

|                          |                                                                                                                                                                                                                                                                                                                                                                                                                                                                                                                                                                                                                                                               |
|--------------------------|---------------------------------------------------------------------------------------------------------------------------------------------------------------------------------------------------------------------------------------------------------------------------------------------------------------------------------------------------------------------------------------------------------------------------------------------------------------------------------------------------------------------------------------------------------------------------------------------------------------------------------------------------------------|
| Results                  | <p>Total own-price elasticities, median (interquartile interval):</p> <ul style="list-style-type: none"> <li>- beer: -0.50 (-0.91, -0.36)</li> <li>- wine: -0.64 (-1.03, -0.38)</li> <li>- spirits: -0.79 (-0.90, -0.24)</li> <li>- ethanol: -0.77 (-2.00, -0.50)</li> </ul> <p>- prices/taxes were associated with a lower prevalence of excessive alcohol consumption</p> <p>Median estimates presented without any distinction between price- and tax-elasticities, and between short- and long-run price elasticities.</p>                                                                                                                                |
| Study's conclusion       | <ul style="list-style-type: none"> <li>- Consistent evidence that higher alcohol prices and alcohol taxes were associated with reductions in excessive alcohol consumption;</li> <li>- Some evidence that price effects may be more pronounced among groups with a higher prevalence of excessive alcohol consumption (e.g., young men);</li> <li>- The majority of estimates of price elasticity fell within the range of approximately -0.30 to -1.00;</li> <li>- Reasonable to expect that alcohol price elasticities may vary across population groups by age and disposable income but assessment of such group differences was not possible.</li> </ul> |
| Limitations/risk of bias | <p>No account for differing types of price elasticities (e.g., short-run, long-run); limited generalizability to LMIC.</p>                                                                                                                                                                                                                                                                                                                                                                                                                                                                                                                                    |

**Fogarty J. The demand for beer, wine and spirits: a survey of the literature. Journal of Economic Surveys 2010; 24(3): 428-78.**

|                                                                                                   |                                                                                                                                                                                                                                                                                                                                                                                        |
|---------------------------------------------------------------------------------------------------|----------------------------------------------------------------------------------------------------------------------------------------------------------------------------------------------------------------------------------------------------------------------------------------------------------------------------------------------------------------------------------------|
| Type of review / publication                                                                      | - meta-analysis; meta-regression<br>- journal: Journal of Economic Surveys                                                                                                                                                                                                                                                                                                             |
| Was an 'a priori' design provided?                                                                | No                                                                                                                                                                                                                                                                                                                                                                                     |
| Was there duplicate study selection and data extraction?                                          | No                                                                                                                                                                                                                                                                                                                                                                                     |
| Was a comprehensive literature search performed?                                                  | No; search not described.<br>- databases: not reported;<br>- Year / month of last search: not reported;<br>- # of studies included: 106<br>- LMIC: 1 (Partanen, 1991 - Kenya)                                                                                                                                                                                                          |
| Was the status of publication (i.e. grey literature) used as an inclusion criterion?              | Unclear                                                                                                                                                                                                                                                                                                                                                                                |
| Was a list of studies (included and excluded) provided?                                           | No; list of excluded studies not provided.                                                                                                                                                                                                                                                                                                                                             |
| Were the characteristics of the included studies provided?                                        | Yes. Broad characteristics of included studies were provided (authors / year of publication / country, time period, study design, type of demand model).                                                                                                                                                                                                                               |
| Was the scientific quality of the included studies assessed and documented?                       | No quality assessment approach / tool used. As a quality inclusion criterion, authors excluded from analysis empirical studies that did not provide sufficient data for calculating some form of numerical estimate of effect and estimate of its standard error. Sensitivity and robustness analyses to evaluate consistency of estimates across study characteristics was conducted. |
| Was the scientific quality of the included studies used appropriately in formulating conclusions? | n / a; no quality assessment conducted.                                                                                                                                                                                                                                                                                                                                                |
| Were the methods used to combine the findings of studies appropriate?                             | Yes; meta-analysis conducted using fixed- and random-effect models.                                                                                                                                                                                                                                                                                                                    |
| Was the likelihood of publication bias assessed?                                                  | Yes                                                                                                                                                                                                                                                                                                                                                                                    |
| Funding, conflicts of interest reported?                                                          | - Review: no;<br>- Included studies: no.                                                                                                                                                                                                                                                                                                                                               |

|                          |                                                                                                                                                                                                                                                                                                                                                                                                                                                                                                                                                       |
|--------------------------|-------------------------------------------------------------------------------------------------------------------------------------------------------------------------------------------------------------------------------------------------------------------------------------------------------------------------------------------------------------------------------------------------------------------------------------------------------------------------------------------------------------------------------------------------------|
| Results                  | <p>Pooled total own-price elasticities</p> <ul style="list-style-type: none"> <li>- fixed effects:</li> <li>- beer: -0.26</li> <li>- wine: -0.83</li> <li>- spirits: -0.38</li> <li>- random effects:</li> <li>- beer: -0.36</li> <li>- wine: -0.57</li> <li>- spirits: -0.5</li> </ul> <p>Significance levels not reported; all estimates were statistically significantly different than 0.</p> <p>Pooled estimates calculated without any distinction between price- and tax-elasticities, and between short- and long-run price elasticities.</p> |
| Study's conclusion       | <p>No specific conclusion regarding the overall magnitude and statistical significance of own-price elasticity estimates. A gradual drift towards more elastic own-price elasticity estimates was noted.</p>                                                                                                                                                                                                                                                                                                                                          |
| Limitations/risk of bias | <p>Non-systematic search strategy; no quality assessment of included studies; no account for differing types of price elasticities (e.g., short-run, long-run); limited generalizability to LMIC.</p>                                                                                                                                                                                                                                                                                                                                                 |

Patra J, Giesbrecht N, Rehm J, Bekmuradov D, Popova A. Are alcohol prices and taxes an evidence-based approach to reducing alcohol-related harm and promoting public health and safety? A literature review. *Contemporary Drug Problems* 2012; 39(1): 7-48.

|                                                                                                   |                                                                                                                                                                                                                                                                 |
|---------------------------------------------------------------------------------------------------|-----------------------------------------------------------------------------------------------------------------------------------------------------------------------------------------------------------------------------------------------------------------|
| Type of review/ publication                                                                       | - narrative review<br>- journal: <i>Contemporary Drug Problems</i>                                                                                                                                                                                              |
| Was an 'a priori' design provided?                                                                | Unclear                                                                                                                                                                                                                                                         |
| Was there duplicate study selection and data extraction?                                          | Yes                                                                                                                                                                                                                                                             |
| Was a comprehensive literature search performed?                                                  | Yes.<br>- databases: MEDLINE, EMBASE, CINHALL, and PsycInfo.<br>- Year/month of last search: June 2011;<br>- # of studies included: 26 (excluded studies that only focused on overall consumption as an outcome variable);<br>- LMIC: 0                         |
| Was the status of publication (i.e. grey literature) used as an inclusion criterion?              | No                                                                                                                                                                                                                                                              |
| Was a list of studies (included and excluded) provided?                                           | No; list of excluded studies not provided.                                                                                                                                                                                                                      |
| Were the characteristics of the included studies provided?                                        | Yes; broad characteristics of included studies were provided (design of study, main indicators, intervention, findings and policy implications).                                                                                                                |
| Was the scientific quality of the included studies assessed and documented?                       | The quality of individual articles was assessed based on 4 domains: comparability of subjects, exposure, outcome measurement, and funding/sponsorship. For some studies, some limitations were reported (albeit extremely briefly) along study characteristics. |
| Was the scientific quality of the included studies used appropriately in formulating conclusions? | Unclear                                                                                                                                                                                                                                                         |
| Were the methods used to combine the findings of studies appropriate?                             | n/a                                                                                                                                                                                                                                                             |
| Was the likelihood of publication bias assessed?                                                  | n/a                                                                                                                                                                                                                                                             |
| Funding, conflicts of interest reported?                                                          | - Review: yes; Nova Scotia Department of Health Promotion and Protection, Centre for Addiction and Mental Health; Ontario Ministry of Health and Long Term Care.<br>- Included studies: yes, but not reported.                                                  |
| Results                                                                                           | Only broad results were provided. Changes in price or taxes of alcohol were found to have had an impact on drinking patterns, including high risk drinking.                                                                                                     |
| Study's conclusion                                                                                | The literature summarized in this article points to the importance of alcohol taxes and prices as a tool for promoting public health and safety.                                                                                                                |



|                          |                                                                                                                                                        |
|--------------------------|--------------------------------------------------------------------------------------------------------------------------------------------------------|
| Limitations/risk of bias | Limited quality assessment of included studies; overly broad presentation of results (focus on direction of effect); limited generalizability to LMIC. |
|--------------------------|--------------------------------------------------------------------------------------------------------------------------------------------------------|

**Sornpaisarn B, Shield K, Cohen J, Schwartz R, Rehm J. Elasticity of alcohol consumption, alcohol-related harms, and drinking initiation in low- and middle-income countries: A systematic review and meta-analysis. The International Journal of Alcohol and Drug Research 2013; 2(1).**

|                                                                                                   |                                                                                                                                                                                                                                                                                                                                                                                                                                                                                                                                                           |
|---------------------------------------------------------------------------------------------------|-----------------------------------------------------------------------------------------------------------------------------------------------------------------------------------------------------------------------------------------------------------------------------------------------------------------------------------------------------------------------------------------------------------------------------------------------------------------------------------------------------------------------------------------------------------|
| Type of review/ publication                                                                       | - meta-analysis<br>- journal: International Journal of Alcohol and Drug Research                                                                                                                                                                                                                                                                                                                                                                                                                                                                          |
| Was an 'a priori' design provided?                                                                | Unclear                                                                                                                                                                                                                                                                                                                                                                                                                                                                                                                                                   |
| Was there duplicate study selection and data extraction?                                          | Yes                                                                                                                                                                                                                                                                                                                                                                                                                                                                                                                                                       |
| Was a comprehensive literature search performed?                                                  | Yes;<br>- databases: MEDLINE, EMBASE, PsycINFO, and EconLit;<br>- Year/month of last search: June 2011;<br>- # of studies included: 12;<br>- LMIC: 12 (Musgrave, Stern, 1988 - Karnataka, India; Partanen, 1991 - Kenya; Fan, Waiiles, Cramer, 1995 - China; Okello, 2001 - Kenya; Osoro et al., 2001 - Tanzania; Özgüven, 2004 - Turkey; Selvanathan, Selvanathan, 2005 - 19 LMIC; John, 2005 - India; Andrienko, Nemtsov, 2005 - Russia; Pan, Fang, Malaga, 2006 - China; Poapongsakorn, Leelahanon, et al., 2007 - Thailand; Yu & Abler, 2010 - China) |
| Was the status of publication (i.e. grey literature) used as an inclusion criterion?              | Yes                                                                                                                                                                                                                                                                                                                                                                                                                                                                                                                                                       |
| Was a list of studies (included and excluded) provided?                                           | No; list of excluded studies not provided.                                                                                                                                                                                                                                                                                                                                                                                                                                                                                                                |
| Were the characteristics of the included studies provided?                                        | Yes. Broad characteristics of included studies were provided (author/year/source; country of study; study design/year and source of data; population; intervention; other independent variables; comparison; outcome; type of publication).                                                                                                                                                                                                                                                                                                               |
| Was the scientific quality of the included studies assessed and documented?                       | Minimum quality criteria for inclusion were used: (1) a longitudinal study had to have enough time points to provide a meaningful result; and (2) the results were not confounded by any other large changes in alcohol control policies that were not taken into account.<br>- minimal and broad data limitation for each study were highlighted;<br>- authors stated that "problems with statistical analysis" were assessed; however, no such assessment was presented.                                                                                |
| Was the scientific quality of the included studies used appropriately in formulating conclusions? | Unclear                                                                                                                                                                                                                                                                                                                                                                                                                                                                                                                                                   |
| Were the methods used to combine the findings of studies appropriate?                             | Yes; meta-analysis conducted using random-effect models.                                                                                                                                                                                                                                                                                                                                                                                                                                                                                                  |
| Was the likelihood of publication bias assessed?                                                  | Yes; funnel plots, Begg's rank correlation test; Egger's test.                                                                                                                                                                                                                                                                                                                                                                                                                                                                                            |
| Funding, conflicts of interest reported?                                                          | - Review: yes. Thai Health Promotion Foundation; Department of Mental Health, Ministry of Public Health, Thailand; US NIAAA.<br>- Included studies: no.                                                                                                                                                                                                                                                                                                                                                                                                   |

|                           |                                                                                                                                                                                                                                                                                                                                                                                                                                                                                                                               |
|---------------------------|-------------------------------------------------------------------------------------------------------------------------------------------------------------------------------------------------------------------------------------------------------------------------------------------------------------------------------------------------------------------------------------------------------------------------------------------------------------------------------------------------------------------------------|
| Results                   | <p>Pooled total own-price elasticities (95%CI):</p> <ul style="list-style-type: none"> <li>- total alcohol: -0.64 (-0.80,-0.48)</li> <li>- beer: -0.50 (-0.78,-0.22)</li> <li>- other alcoholic beverages: -0.79 (-1.09,-0.49)</li> <li>- all studies: -0.66 (-0.82,-0.51)</li> </ul> <p>Pooled estimates calculated without any distinction between price and tax elasticities, between short- and long-run price elasticities and between types of own-price elasticities (participation, or consumption elasticities).</p> |
| Study's conclusion        | Inverse relationship between alcohol consumption and price and / or taxation, similar to what has been observed in high-income countries.                                                                                                                                                                                                                                                                                                                                                                                     |
| Limitations/ risk of bias | Relatively small number of studies included; relatively vague quality assessment criteria; non-english or Thai studies or reports excluded.                                                                                                                                                                                                                                                                                                                                                                                   |

**van Walbeek C, Blecher E. The Economics of alcohol use, misuse and policy in South Africa. Cape Town: University of Cap Town, World Health Organization South Africa Office, 2014.**

|                                                                                                   |                                                                                                                                                                                                                                                                                                                                                                                                                       |
|---------------------------------------------------------------------------------------------------|-----------------------------------------------------------------------------------------------------------------------------------------------------------------------------------------------------------------------------------------------------------------------------------------------------------------------------------------------------------------------------------------------------------------------|
| Type of review / publication                                                                      | - narrative review<br>- Report                                                                                                                                                                                                                                                                                                                                                                                        |
| Was an 'a priori' design provided?                                                                | No                                                                                                                                                                                                                                                                                                                                                                                                                    |
| Was there duplicate study selection and data extraction?                                          | No                                                                                                                                                                                                                                                                                                                                                                                                                    |
| Was a comprehensive literature search performed?                                                  | Unclear.; search not described<br>- databases: not reported;<br>- Year / month of last search: not reported;<br>- # of studies included:<br>High-income: 83<br>- LMIC: 7 (Tian, Liu, 2011 - China; Selvanathan & Selvanathan, 2005 - 19 LMICs; John, 2005 - India; Okello, 2001 - Kenya; Andrienko, Nemtsov, 2006 - Russia; National Treasury, 2002 - South Africa; Bureau of Economic Research, 2010 - South Africa) |
| Was the status of publication (i.e. grey literature) used as an inclusion criterion?              | Yes                                                                                                                                                                                                                                                                                                                                                                                                                   |
| Was a list of studies (included and excluded) provided?                                           | No; list of excluded studies not provided.                                                                                                                                                                                                                                                                                                                                                                            |
| Were the characteristics of the included studies provided?                                        | Yes; very broad characteristics of included studies were provided (author / date; country; time period and data; type of price effects (e.g., short-run, long-run)).                                                                                                                                                                                                                                                  |
| Was the scientific quality of the included studies assessed and documented?                       | No                                                                                                                                                                                                                                                                                                                                                                                                                    |
| Was the scientific quality of the included studies used appropriately in formulating conclusions? | n/a                                                                                                                                                                                                                                                                                                                                                                                                                   |
| Were the methods used to combine the findings of studies appropriate?                             | n/a                                                                                                                                                                                                                                                                                                                                                                                                                   |
| Was the likelihood of publication bias assessed?                                                  | n/a                                                                                                                                                                                                                                                                                                                                                                                                                   |
| Funding, conflicts of interest reported?                                                          | - Review: yes; World Health Organization South Africa Office.<br>- Included studies: no.                                                                                                                                                                                                                                                                                                                              |
| Results                                                                                           | Only broad results presented:<br>- a 10% increase in the price of alcohol reduced alcohol consumption by about 4 to 8% in most low- and middle-income countries.                                                                                                                                                                                                                                                      |

|                          |                                                                                                                                                                                                                                                |
|--------------------------|------------------------------------------------------------------------------------------------------------------------------------------------------------------------------------------------------------------------------------------------|
| Study's conclusion       | The conclusion drawn by this literature is unambiguous, namely that an increase in alcohol prices reduces alcohol consumption. The price elasticity of demand varies from one country to another, but is nearly always in the inelastic range. |
| Limitations/risk of bias | Non-systematic search strategy; no quality assessment; only very broad results presented which limit usefulness of review; despite focus on LMIC small number of studies included which limits generalizability to LMIC.                       |

**Li Q, Babor TF, Zeigler D, et al. Health promotion interventions and policies addressing excessive alcohol use: a systematic review of national and global evidence as a guide to health-care reform in China. *Addiction* 2015; 110 Suppl 1: 68-78.**

|                                                                                      |                                                                                                                                                                                                                                                                                                                                                                    |
|--------------------------------------------------------------------------------------|--------------------------------------------------------------------------------------------------------------------------------------------------------------------------------------------------------------------------------------------------------------------------------------------------------------------------------------------------------------------|
| Type of review/ publication                                                          | - narrative review<br>- Journal: <i>Addiction</i>                                                                                                                                                                                                                                                                                                                  |
| Was an 'a priori' design provided?                                                   | No.                                                                                                                                                                                                                                                                                                                                                                |
| Was there duplicate study selection and data extraction?                             | Unclear.                                                                                                                                                                                                                                                                                                                                                           |
| Was a comprehensive literature search performed?                                     | Yes.<br>- databases: PubMed; EBSCO and three major Chinese databases (the National Knowledge Infrastructure Database, the Chongqing VIP Information Scientific and Technical Journal Database and National Central Library from Taiwan);<br>- Year/month of last search: not reported;<br>- # of studies included: 1 (Chung et al., 2013 - Hong Kong)<br>- LMIC: 0 |
| Was the status of publication (i.e. grey literature) used as an inclusion criterion? | Unclear.                                                                                                                                                                                                                                                                                                                                                           |
| Was a list of studies (included and excluded) provided?                              | No. List of excluded studies not provided.                                                                                                                                                                                                                                                                                                                         |
| Were the characteristics of the included studies provided?                           | Yes. Broad characteristics of included studies were provided (author/date; target group; design; intervention components; outcomes; study quality; main findings).                                                                                                                                                                                                 |

|                                                                                                   |                                                                                                                                                                                                                                                                                                                                                                                                                                                                                                                                                                                                                                                                                                                                                                                                                                                                                                                                                                                                                                                                                                                                                                                                                                                                                                                                                                                                                                                                                                                                                                                                                                                                                                                                                                                                                                                                                                                                                                                                                                                                                                                                                                                                                                    |
|---------------------------------------------------------------------------------------------------|------------------------------------------------------------------------------------------------------------------------------------------------------------------------------------------------------------------------------------------------------------------------------------------------------------------------------------------------------------------------------------------------------------------------------------------------------------------------------------------------------------------------------------------------------------------------------------------------------------------------------------------------------------------------------------------------------------------------------------------------------------------------------------------------------------------------------------------------------------------------------------------------------------------------------------------------------------------------------------------------------------------------------------------------------------------------------------------------------------------------------------------------------------------------------------------------------------------------------------------------------------------------------------------------------------------------------------------------------------------------------------------------------------------------------------------------------------------------------------------------------------------------------------------------------------------------------------------------------------------------------------------------------------------------------------------------------------------------------------------------------------------------------------------------------------------------------------------------------------------------------------------------------------------------------------------------------------------------------------------------------------------------------------------------------------------------------------------------------------------------------------------------------------------------------------------------------------------------------------|
| Was the scientific quality of the included studies assessed and documented?                       | <p>Yes; study quality was evaluated on a scale of 1–5 according to the Maryland Scale of Scientific Methods:</p> <p>Level 1: Either (a) a cross-sectional comparison of treated groups with untreated groups, or (b) a before-and-after comparison of treated group, without an untreated comparison group. No use of control variables in statistical analysis to adjust for differences between treated and untreated groups or periods.</p> <p>Level 2: Use of adequate control variables and either (a) a cross-sectional comparison of treated groups with untreated groups, or (b) a before-and-after comparison of treated group, without an untreated comparison group. In (a), control variables or matching techniques used to account for cross-sectional differences between treated and controls groups. In (b), control variables are used to account for before-and- after changes in macro level factors.</p> <p>Level 3: Comparison of outcomes in treated group after an intervention, with outcomes in the treated group before the intervention, and a comparison group used to provide a counterfactual (e.g. difference in difference). Justification given to choice of comparator group that is argued to be similar to the treatment group. Evidence presented on comparability of treatment and control groups. Techniques such as regression and (propensity score) matching may be used to adjust for difference between treated and untreated groups, but there are likely to be important unobserved differences remaining.</p> <p>Level 4: Quasi-randomness in treatment is exploited, so that it can be credibly held that treatment and control groups differ only in their exposure to the random allocation of treatment. This often entails the use of an instrument or discontinuity in treatment, the suitability of which should be adequately demonstrated and defended.</p> <p>Level 5: Reserved for research designs that involve explicit randomisation into treatment and control groups, with Randomised Control Trials (RCTs) providing the definitive example.</p> <p>Equity Checklist for Systematic Reviews to assess equity and gender sensitivity of actions was also used.</p> |
| Was the scientific quality of the included studies used appropriately in formulating conclusions? | Unclear                                                                                                                                                                                                                                                                                                                                                                                                                                                                                                                                                                                                                                                                                                                                                                                                                                                                                                                                                                                                                                                                                                                                                                                                                                                                                                                                                                                                                                                                                                                                                                                                                                                                                                                                                                                                                                                                                                                                                                                                                                                                                                                                                                                                                            |
| Were the methods used to combine the findings of studies appropriate?                             | n/a                                                                                                                                                                                                                                                                                                                                                                                                                                                                                                                                                                                                                                                                                                                                                                                                                                                                                                                                                                                                                                                                                                                                                                                                                                                                                                                                                                                                                                                                                                                                                                                                                                                                                                                                                                                                                                                                                                                                                                                                                                                                                                                                                                                                                                |
| Was the likelihood of publication bias assessed?                                                  | n/a                                                                                                                                                                                                                                                                                                                                                                                                                                                                                                                                                                                                                                                                                                                                                                                                                                                                                                                                                                                                                                                                                                                                                                                                                                                                                                                                                                                                                                                                                                                                                                                                                                                                                                                                                                                                                                                                                                                                                                                                                                                                                                                                                                                                                                |
| Funding, conflicts of interest reported?                                                          | <ul style="list-style-type: none"> <li>- Review: yes; Thompson Foundation, Birmingham, Alabama.; NIAAA and NICHD;</li> <li>- Included studies: no.</li> </ul>                                                                                                                                                                                                                                                                                                                                                                                                                                                                                                                                                                                                                                                                                                                                                                                                                                                                                                                                                                                                                                                                                                                                                                                                                                                                                                                                                                                                                                                                                                                                                                                                                                                                                                                                                                                                                                                                                                                                                                                                                                                                      |
| Results                                                                                           | One study concluded that an alcohol tax reduction in 2007 and 2008 in Hong Kong was associated with increased alcohol use (as well as decreased binge drinking)                                                                                                                                                                                                                                                                                                                                                                                                                                                                                                                                                                                                                                                                                                                                                                                                                                                                                                                                                                                                                                                                                                                                                                                                                                                                                                                                                                                                                                                                                                                                                                                                                                                                                                                                                                                                                                                                                                                                                                                                                                                                    |
| Study's conclusion                                                                                | Social interventions of an intersectoral nature (e.g. tax policies) and their impact on alcohol-related public health have been shown to be effective in Taiwan and Hong Kong, but have not been evaluated in mainland China.                                                                                                                                                                                                                                                                                                                                                                                                                                                                                                                                                                                                                                                                                                                                                                                                                                                                                                                                                                                                                                                                                                                                                                                                                                                                                                                                                                                                                                                                                                                                                                                                                                                                                                                                                                                                                                                                                                                                                                                                      |
| Limitations/risk of bias                                                                          | Only one study included that examined the impact of prices/taxes on tobacco use; study's conclusion not based on included studies; limited generalizability to LMIC.                                                                                                                                                                                                                                                                                                                                                                                                                                                                                                                                                                                                                                                                                                                                                                                                                                                                                                                                                                                                                                                                                                                                                                                                                                                                                                                                                                                                                                                                                                                                                                                                                                                                                                                                                                                                                                                                                                                                                                                                                                                               |

**Chen D, Abler D, Zhou D, Yu X, Thompson W. A Meta-analysis of Food Demand Elasticities for China. Applied Economic Perspectives and Policy 2016; 38(1): 50-72.**

|                                                                                                   |                                                                                                                                                                                                                                                                                                                                                                                                                                                                                                                                                                                                                                                                                                                           |
|---------------------------------------------------------------------------------------------------|---------------------------------------------------------------------------------------------------------------------------------------------------------------------------------------------------------------------------------------------------------------------------------------------------------------------------------------------------------------------------------------------------------------------------------------------------------------------------------------------------------------------------------------------------------------------------------------------------------------------------------------------------------------------------------------------------------------------------|
| Type of review / publication                                                                      | - meta-analysis<br>- Journal: Applied Economic Perspectives and Policy                                                                                                                                                                                                                                                                                                                                                                                                                                                                                                                                                                                                                                                    |
| Was an 'a priori' design provided?                                                                | No                                                                                                                                                                                                                                                                                                                                                                                                                                                                                                                                                                                                                                                                                                                        |
| Was there duplicate study selection and data extraction?                                          | Unclear                                                                                                                                                                                                                                                                                                                                                                                                                                                                                                                                                                                                                                                                                                                   |
| Was a comprehensive literature search performed?                                                  | Yes.<br>- databases: AgEcon Search, EconLit, USDA / Economic Research Service (ERS); Web of Science, China National Knowledge Infrastructure (CNKI);<br>- Year / month of last search: 2012 (month not reported);<br>- # of studies included: 11<br>- LMIC: 11 (Fan, Cramer, Wailes, 1994 - China, rural; Fan, Wailes, Cramer, 1995 - China, rural; Wang, Halbrendt, Jensen, 1997 - China, urban; Wu, Wu, 1997, - China, urban / rural; Yu, Abler, 2010 - China, rural;<br>In Chinese: Mu, Liyuan, Songtian, 2001 - China; Zhang, Pan, Li, 2001- China, Henan province; Chang, Li, 2006 - China, Jiang-Su region; Zhou 2006, - China, rural; Dong, 2009 - China, western region; Dong, Lu, 2009 - China, western region). |
| Was the status of publication (i.e. grey literature) used as an inclusion criterion?              | Unclear                                                                                                                                                                                                                                                                                                                                                                                                                                                                                                                                                                                                                                                                                                                   |
| Was a list of studies (included and excluded) provided?                                           | No; list of excluded studies not provided.                                                                                                                                                                                                                                                                                                                                                                                                                                                                                                                                                                                                                                                                                |
| Were the characteristics of the included studies provided?                                        | Yes; very broad characteristics of included studies were provided (citation / reference; sample size, number of product categories, publication status, language)                                                                                                                                                                                                                                                                                                                                                                                                                                                                                                                                                         |
| Was the scientific quality of the included studies assessed and documented?                       | No                                                                                                                                                                                                                                                                                                                                                                                                                                                                                                                                                                                                                                                                                                                        |
| Was the scientific quality of the included studies used appropriately in formulating conclusions? | n/a                                                                                                                                                                                                                                                                                                                                                                                                                                                                                                                                                                                                                                                                                                                       |
| Were the methods used to combine the findings of studies appropriate?                             | Yes.; results from a meta-regression were used to derive estimates of total own-price, and cross-price elasticities.                                                                                                                                                                                                                                                                                                                                                                                                                                                                                                                                                                                                      |
| Was the likelihood of publication bias assessed?                                                  | No; publication status is examined but not publication bias.                                                                                                                                                                                                                                                                                                                                                                                                                                                                                                                                                                                                                                                              |
| Funding, conflicts of interest reported?                                                          | - Review: no;<br>- Included studies: no.                                                                                                                                                                                                                                                                                                                                                                                                                                                                                                                                                                                                                                                                                  |



|                          |                                                                                                                                                                                                                                                                                                                                                                                     |
|--------------------------|-------------------------------------------------------------------------------------------------------------------------------------------------------------------------------------------------------------------------------------------------------------------------------------------------------------------------------------------------------------------------------------|
| Results                  | <p>Total own-price elasticity:</p> <ul style="list-style-type: none"> <li>- alcohol, mean: -0.77</li> <li>- alcohol, predicted: -0.65</li> </ul> <p>Predicted cross-price elasticities</p> <ul style="list-style-type: none"> <li>- tobacco: 0.12</li> <li>- rice: 0.13</li> <li>- wheat: 0.26</li> <li>- vegetables: 0.03</li> </ul> <p>Statistical significance not reported.</p> |
| Study's conclusion       | Higher taxes on alcohol could significantly reduce consumption.                                                                                                                                                                                                                                                                                                                     |
| Limitations/risk of bias | No quality assessment of studies; unclear if all studies included measured alcohol similarly; statistical significance of pooled results not reported.                                                                                                                                                                                                                              |

**Boniface S, Scannell JW, Marlow S. Evidence for the effectiveness of minimum pricing of alcohol: a systematic review and assessment using the Bradford Hill criteria for causality. BMJ Open 2017; 7(5): e013497.**

|                                                                                                   |                                                                                                                                                                                                                                                                                                                                                                                                                                                                                    |
|---------------------------------------------------------------------------------------------------|------------------------------------------------------------------------------------------------------------------------------------------------------------------------------------------------------------------------------------------------------------------------------------------------------------------------------------------------------------------------------------------------------------------------------------------------------------------------------------|
| Type of review/ publication                                                                       | - narrative review<br>- Journal: BMJ Open                                                                                                                                                                                                                                                                                                                                                                                                                                          |
| Was an 'a priori' design provided?                                                                | No                                                                                                                                                                                                                                                                                                                                                                                                                                                                                 |
| Was there duplicate study selection and data extraction?                                          | Yes                                                                                                                                                                                                                                                                                                                                                                                                                                                                                |
| Was a comprehensive literature search performed?                                                  | Yes.<br>- databases: PsycINFO, Embase, and Ovid Medline;<br>- Year/month of last search: February 2017;<br>- # of studies included: 35; (reviews, 2 [Booth, 2018, Wagenaar et al., 2009], natural experiments and time series analyses, 14; modelling studies, 7; cross-sectional studies, 9; intervention studies, 2);<br>- LMIC: 3, (Bhattacharya, Gathmann, Miller, 2013 - Russia; Treisman, 2010 - Russia; Wald, Moskalewicz, 1984 - Poland).                                  |
| Was the status of publication (i.e. grey literature) used as an inclusion criterion?              | Yes                                                                                                                                                                                                                                                                                                                                                                                                                                                                                |
| Was a list of studies (included and excluded) provided?                                           | Yes                                                                                                                                                                                                                                                                                                                                                                                                                                                                                |
| Were the characteristics of the included studies provided?                                        | Yes. Broad characteristics of included studies were provided (author/year, country, study design, population or participants, pricing intervention studied, peer reviewed, outcomes studied, conflict of interest, Bradford Hill criteria met).                                                                                                                                                                                                                                    |
| Was the scientific quality of the included studies assessed and documented?                       | The Effective Public Health Practice Project (EPHPP) Quality Assessment Tool was used to assess the quality of individual quantitative studies. Quality assessment of individual studies not provided; only broad scores presented (weak, moderate, strong).                                                                                                                                                                                                                       |
| Was the scientific quality of the included studies used appropriately in formulating conclusions? | Yes                                                                                                                                                                                                                                                                                                                                                                                                                                                                                |
| Were the methods used to combine the findings of studies appropriate?                             | n/a                                                                                                                                                                                                                                                                                                                                                                                                                                                                                |
| Was the likelihood of publication bias assessed?                                                  | n/a                                                                                                                                                                                                                                                                                                                                                                                                                                                                                |
| Funding, conflicts of interest reported?                                                          | - Review: Yes. Open access for this article was funded by King's College London Open Scholarship Fund; two authors work at King's College London, which as an institution is listed as a member of the Alcohol Health Alliance; one author has received funding indirectly from UKCTAS, which as an institution is also listed as a member of the Alcohol Health Alliance. None of the authors have any relationship with the Alcohol Health Alliance.<br>- Included studies: Yes. |

|                          |                                                                                                                                                                                                                                                                                                                                                                                                                                                                                                                                                                                                                                                                                                                                                   |
|--------------------------|---------------------------------------------------------------------------------------------------------------------------------------------------------------------------------------------------------------------------------------------------------------------------------------------------------------------------------------------------------------------------------------------------------------------------------------------------------------------------------------------------------------------------------------------------------------------------------------------------------------------------------------------------------------------------------------------------------------------------------------------------|
| Results                  | <p>There was very little evidence that minimum alcohol prices were not associated with consumption or subsequent harms. Results were presented with respect to the Bradford Hill criteria for causality:</p> <ul style="list-style-type: none"> <li>- Strength of the association: reasonably good support;</li> <li>- Consistency: very strong support;</li> <li>- Specificity: very strong support;</li> <li>- Temporality: very strong support;</li> <li>- Dose–response/biological gradient: strong support, although the relationship is difficult to quantify;</li> <li>- Plausibility: strong support;</li> <li>- Coherence: strong support;</li> <li>- Experiment: tentative support;</li> <li>- Analogy: very strong support.</li> </ul> |
| Study's conclusion       | <p>Review lend strong support for policies such as minimum unit price in reducing alcohol consumption and alcohol-related harm, with all nine of the Bradford Hill criteria met, and little by way of counter findings.</p>                                                                                                                                                                                                                                                                                                                                                                                                                                                                                                                       |
| Limitations/risk of bias | <p>Limited discussion of effect sizes; complete quality assessment not reported; limited generalizability to LMIC.</p>                                                                                                                                                                                                                                                                                                                                                                                                                                                                                                                                                                                                                            |

**Scott S, Muirhead C, Shucksmith J, Tyrrell R, Kaner E. Does Industry-Driven Alcohol Marketing Influence Adolescent Drinking Behaviour? A Systematic Review. Alcohol Alcohol 2017; 52(1): 84-94.**

|                                                                                                   |                                                                                                                                                                                                                                                                                                |
|---------------------------------------------------------------------------------------------------|------------------------------------------------------------------------------------------------------------------------------------------------------------------------------------------------------------------------------------------------------------------------------------------------|
| Type of review / publication                                                                      | - narrative review<br>- journal: Alcohol and Alcoholism                                                                                                                                                                                                                                        |
| Was an 'a priori' design provided?                                                                | No                                                                                                                                                                                                                                                                                             |
| Was there duplicate study selection and data extraction?                                          | Yes                                                                                                                                                                                                                                                                                            |
| Was a comprehensive literature search performed?                                                  | Yes;<br>- databases: MEDLINE, EMBASE, SCOPUS, PsychINFO, CINAHL and ProQuest databases (including CSA Illumina).<br>- Year / month of last search: July 2015;<br>- # of studies included: 2; drinking initiation, 0; drinking continuation, 1; drinking frequency, 0; drinking intensity, 1;   |
| Was the status of publication (i.e. grey literature) used as an inclusion criterion?              | Yes                                                                                                                                                                                                                                                                                            |
| Was a list of studies (included and excluded) provided?                                           | No; list of excluded studies not provided.                                                                                                                                                                                                                                                     |
| Were the characteristics of the included studies provided?                                        | Yes; characteristics and a summary results of included studies were provided (study / setting, sample characteristics [age, gender, socioeconomic status, ethnic background], study design; exposure measures, behavioural outcome measures, follow up [rate / duration]), reported analyses). |
| Was the scientific quality of the included studies assessed and documented?                       | The Effective Public Health Practice Project (EPHPP) Quality Assessment Tool was used to assess the quality of individual studies. Quality assessment of individual studies not provided; only broad scores presented (weak, moderate, strong).                                                |
| Was the scientific quality of the included studies used appropriately in formulating conclusions? | Yes                                                                                                                                                                                                                                                                                            |
| Were the methods used to combine the findings of studies appropriate?                             | n/a                                                                                                                                                                                                                                                                                            |
| Was the likelihood of publication bias assessed?                                                  | n/a                                                                                                                                                                                                                                                                                            |
| Funding, conflicts of interest reported?                                                          | - Review: yes; Economic and Social Research Council (ESRC); National Institute for Health Research (NIHR)'s School for Public Health Research (SPHR);<br>- Included studies: no.                                                                                                               |

|                          |                                                                                                                                                                                                                                                                                                                                                                                                                                                                                                                                                                                                                                                                               |
|--------------------------|-------------------------------------------------------------------------------------------------------------------------------------------------------------------------------------------------------------------------------------------------------------------------------------------------------------------------------------------------------------------------------------------------------------------------------------------------------------------------------------------------------------------------------------------------------------------------------------------------------------------------------------------------------------------------------|
| Results                  | <ul style="list-style-type: none"> <li>- Drinking continuation: one study found that alcohol discounts had a significant effect on alcohol consumption among young people aged 14–17 in the Netherlands.</li> <li>- Drinking intensity: one study, using two datasets, found that binge drinking among US adolescents (mean age: 15 years) decreased as price increased (data set 1: price elasticity: <math>-0.18</math> (95%CI <math>-0.30, -0.06</math>); data set 2: price elasticity: <math>-0.73</math> (95%CI <math>-1.51, 0.05</math>).</li> </ul> <p>The reported price elasticities for drinking intensity were past two-week binge participation elasticities.</p> |
| Study's conclusion       | <p>Only two studies identified by this review focused on alcohol price and drinking behaviour in those under the age of 18. Whilst both studies reported only positive associations, both of these studies were categorized as methodologically 'weak', and price and affordability remains a significantly understudied influence upon young people's drinking behaviour.</p>                                                                                                                                                                                                                                                                                                |
| Limitations/risk of bias | <p>Very small number of studies included limits the usefulness of the review; complete quality assessment not reported.</p>                                                                                                                                                                                                                                                                                                                                                                                                                                                                                                                                                   |

**Appendix 6.** Characteristics of included reviews funded by the International Center for Alcohol Policies (ICAP) and authored or co-authored by Jon Nelson

a. Aggregate-level data

**Nelson JP. Meta-analysis of alcohol price and income elasticities - with corrections for publication bias. Health Econ Rev 2013; 3(1): 17. [24]**

|                                                                                                   |                                                                                                                                                                                                                                                                                                                                                                                                                                                                                                                                                                                                                                                                                                                                                                                                                                                                           |
|---------------------------------------------------------------------------------------------------|---------------------------------------------------------------------------------------------------------------------------------------------------------------------------------------------------------------------------------------------------------------------------------------------------------------------------------------------------------------------------------------------------------------------------------------------------------------------------------------------------------------------------------------------------------------------------------------------------------------------------------------------------------------------------------------------------------------------------------------------------------------------------------------------------------------------------------------------------------------------------|
| Type of review / publication                                                                      | - meta-analysis<br>- Journal: Health Econ Rev                                                                                                                                                                                                                                                                                                                                                                                                                                                                                                                                                                                                                                                                                                                                                                                                                             |
| Was an 'a priori' design provided?                                                                | No                                                                                                                                                                                                                                                                                                                                                                                                                                                                                                                                                                                                                                                                                                                                                                                                                                                                        |
| Was there duplicate study selection and data extraction?                                          | No                                                                                                                                                                                                                                                                                                                                                                                                                                                                                                                                                                                                                                                                                                                                                                                                                                                                        |
| Was a comprehensive literature search performed?                                                  | Yes. Search clearly described and comprehensive.<br>- databases: AgEcon Search, EconLit, JSTOR, RePEc, SSRN, EBSCO Host, ProQuest, ScienceDirect Journals, Wiley Online Library;<br>- Year /month of last search: August-October 2012;<br>- # of studies included: 182<br>- LMIC: 16 (Partanen, 1991 - Kenya; Florkowski, McNamara, 1992 - Poland; Wang, Halbrendt, Jensen, 1997 - China; Troncoso-Valverde, 2004 - Chile; Özgüven, 2004 - Turkey; John, 2005 - India; Meyerhoefer, Ranney, Sahn, 2005 - Romania; Andrienko, Nemtsov, 2005 - Russia; Baltagi, Geishecker, 2006 - Russia; Györfi, 2006 - Hungary; Pan, Fang, Malaga, 2006 - China; Osoro et al., 2006 - Tanzania; Treisman, 2010 - Russia; Yu, Abler, 2010 - China; Shi, 2011 - China; Tian, Liu, 2011 - China; Pang Fang, 2003 was included although it is an earlier version of Pan, Fang, Malaga, 2006) |
| Was the status of publication (i.e. grey literature) used as an inclusion criterion?              | Yes                                                                                                                                                                                                                                                                                                                                                                                                                                                                                                                                                                                                                                                                                                                                                                                                                                                                       |
| Was a list of studies (included and excluded) provided?                                           | Yes                                                                                                                                                                                                                                                                                                                                                                                                                                                                                                                                                                                                                                                                                                                                                                                                                                                                       |
| Were the characteristics of the included studies provided?                                        | No                                                                                                                                                                                                                                                                                                                                                                                                                                                                                                                                                                                                                                                                                                                                                                                                                                                                        |
| Was the scientific quality of the included studies assessed and documented?                       | Some studies excluded because of poor reporting (e.g., missing standard erros), or poor methods "linear model or poor data"; quality of included studies not generally assessed (no formal quality assessment approach/tool used); unclear which study was excluded and why.                                                                                                                                                                                                                                                                                                                                                                                                                                                                                                                                                                                              |
| Was the scientific quality of the included studies used appropriately in formulating conclusions? | Unclear                                                                                                                                                                                                                                                                                                                                                                                                                                                                                                                                                                                                                                                                                                                                                                                                                                                                   |
| Were the methods used to combine the findings of studies appropriate?                             | Yes. Meta-analysis conducted using fixed- and random-effect models; results presented for trimmed samples (10%); heterogeneity not formally assessed.                                                                                                                                                                                                                                                                                                                                                                                                                                                                                                                                                                                                                                                                                                                     |

|                                                  |                                                                                                                                                                                                                                                                                                                                                                                                                                                                                                                                                                                                                                                                                                    |
|--------------------------------------------------|----------------------------------------------------------------------------------------------------------------------------------------------------------------------------------------------------------------------------------------------------------------------------------------------------------------------------------------------------------------------------------------------------------------------------------------------------------------------------------------------------------------------------------------------------------------------------------------------------------------------------------------------------------------------------------------------------|
| Was the likelihood of publication bias assessed? | Yes, funnel plots, Egger tests.                                                                                                                                                                                                                                                                                                                                                                                                                                                                                                                                                                                                                                                                    |
| Funding, conflicts of interest reported?         | <ul style="list-style-type: none"> <li>- Review: International Center for Alcohol Policies (ICAP), Washington, DC.</li> <li>- Included studies: No.</li> </ul> <p>Strong links between ICAP and alcohol industry and author's close ties to alcohol industry could be more clearly reported.</p>                                                                                                                                                                                                                                                                                                                                                                                                   |
| Results                                          | <p>Pooled total own-price elasticities, trimmed samples (95%CI)</p> <ul style="list-style-type: none"> <li>- fixed effects:</li> <li>- beer: -0.26 (-0.46, -0.06)</li> <li>- wine: -0.34 (-0.54, -0.14)</li> <li>- spirits: -0.49 (-0.69, -0.29)</li> <li>- alcohol: -0.46 (-0.66, -0.26)</li> <li>- random effects</li> <li>- beer: -0.35 (-0.39, -0.31)</li> <li>- wine: -0.58 (-0.64, -0.52)</li> <li>- spirits: -0.64 (-0.70, -0.58)</li> <li>- alcohol: -0.58 (-0.64, -0.52)</li> </ul> <p>Total own-price elasticities, full samples, medians</p> <ul style="list-style-type: none"> <li>- beer: -0.32</li> <li>- wine: -0.57</li> <li>- spirits: -0.67</li> <li>- alcohol: -0.54</li> </ul> |
| Study's conclusion                               | The average price elasticities reported imply that reducing alcohol consumption through price or tax increases will be less effective or more costly than previously suggested or claimed.                                                                                                                                                                                                                                                                                                                                                                                                                                                                                                         |
| Limitations/ risk of bias                        | <p>Substantial overlap with Nelson, 2013 - Journal of Wine Economics and Nelson, 2014 - J Health Econ.</p> <p>No formal quality assessment conducted; opaque selection of individual studies' estimates; unclear if short-run and long-run estimates have been pooled together; heterogeneity not formally assessed; efforts to minimize the potential effect of alcohol prices on alcohol use apparent; data/ results do not support all conclusions.</p>                                                                                                                                                                                                                                         |

**Nelson JP. Robust Demand Elasticities for Wine and Distilled Spirits: Meta-Analysis with Corrections for Outliers and Publication Bias. Journal of Wine Economics 2013; 8(3): 294-317. [25]**

|                                                                                                   |                                                                                                                                                                                                                                                                                                                                                                                                                                                                                                                                                                                   |
|---------------------------------------------------------------------------------------------------|-----------------------------------------------------------------------------------------------------------------------------------------------------------------------------------------------------------------------------------------------------------------------------------------------------------------------------------------------------------------------------------------------------------------------------------------------------------------------------------------------------------------------------------------------------------------------------------|
| Type of review / publication                                                                      | - meta-analysis<br>- Journal: Journal of Wine Economics                                                                                                                                                                                                                                                                                                                                                                                                                                                                                                                           |
| Was an 'a priori' design provided?                                                                | No                                                                                                                                                                                                                                                                                                                                                                                                                                                                                                                                                                                |
| Was there duplicate study selection and data extraction?                                          | No                                                                                                                                                                                                                                                                                                                                                                                                                                                                                                                                                                                |
| Was a comprehensive literature search performed?                                                  | Yes. Search clearly described and comprehensive.<br>- databases: AgEcon Search, EconLit, JSTOR, RePEc, SSRN, EBSCO Host, ProQuest, ScienceDirect Journals, Wiley Online Library;<br>- Year / month of last search: August-September 2012;<br>- # of studies included: 125<br>- LMIC: 6 (Wang, Halbrendt, Jensen, 1997 - China; Troncoso-Valverde, 2004 - Chile; Meyerhoefer et al., 2005 - Romania; Pan, Fang, Malaga, 2006 - China; Treisman, 2010 - Russia; Tian, Liu, 2011 - China; Pang Fang, 2003 was included although it is an earlier version of Pan, Fang, Malaga, 2006) |
| Was the status of publication (i.e. grey literature) used as an inclusion criterion?              | Yes                                                                                                                                                                                                                                                                                                                                                                                                                                                                                                                                                                               |
| Was a list of studies (included and excluded) provided?                                           | No. List of excluded studies not provided.                                                                                                                                                                                                                                                                                                                                                                                                                                                                                                                                        |
| Were the characteristics of the included studies provided?                                        | No                                                                                                                                                                                                                                                                                                                                                                                                                                                                                                                                                                                |
| Was the scientific quality of the included studies assessed and documented?                       | Some studies excluded because of poor reporting (e.g., missing standard erros), or poor methods "linear model or poor data"; quality of included studies not generally assessed (no formal quality assessment approach/tool used); unclear which study was excluded and why.                                                                                                                                                                                                                                                                                                      |
| Was the scientific quality of the included studies used appropriately in formulating conclusions? | Unclear                                                                                                                                                                                                                                                                                                                                                                                                                                                                                                                                                                           |
| Were the methods used to combine the findings of studies appropriate?                             | Yes. Meta-analysis conducted using fixed- and random-effect models; results presented for full and trimmed samples (10%); heterogeneity not formally assessed.                                                                                                                                                                                                                                                                                                                                                                                                                    |
| Was the likelihood of publication bias assessed?                                                  | Yes, funnel plots, Egger tests.                                                                                                                                                                                                                                                                                                                                                                                                                                                                                                                                                   |
| Funding, conflicts of interest reported?                                                          | - Review: International Center for Alcohol Policies (ICAP), Washington, DC.<br>- Included studies: No.<br><br>Strong links between ICAP and alcohol industry and author's close ties to alcohol industry could be more clearly reported.                                                                                                                                                                                                                                                                                                                                          |



|                          |                                                                                                                                                                                                                                                                                                                                                                                                                                                                                     |
|--------------------------|-------------------------------------------------------------------------------------------------------------------------------------------------------------------------------------------------------------------------------------------------------------------------------------------------------------------------------------------------------------------------------------------------------------------------------------------------------------------------------------|
| Results                  | <p>Pooled total own-price elasticities, full samples (95%CI)</p> <ul style="list-style-type: none"> <li>- fixed effects:</li> <li>- wine: -0.63 (-0.65, -0.61)</li> <li>- spirits: -0.48 (-0.50, -0.46)</li> <li>- random effects:</li> <li>- wine: -0.62 (-0.74, -0.50)</li> <li>- spirits: -0.65 (-0.73, -0.57)</li> </ul> <p>Pooled total own-price elasticities, trimmed samples</p> <ul style="list-style-type: none"> <li>- same as Nelson, 2013 (Health Econ Rev)</li> </ul> |
| Study's conclusion       | <p>Results in this paper provide evidence that price elasticities for wine and spirits are contaminated by publication bias. The bias is toward larger (more elastic) values. Given the evidence for publication bias, averages obtained using cumulative meta-analyses are a useful compromise. Cumulative random-effect averages (at the 50th percentile) are approximately: wine price elasticity, -0.45 and spirits price elasticity, -0.55.</p>                                |
| Limitations/risk of bias | <p>Substantial overlap with Nelson, 2013 - Health Econ Rev.</p> <p>No formal quality assessment conducted; opaque selection of individual studies' estimates; unclear if short-run and long-run estimates have been pooled together; heterogeneity not formally assessed; efforts to minimize the potential effect of alcohol prices on alcohol use apparent; data / results do not support all conclusions.</p>                                                                    |

**Nelson JP. Estimating the price elasticity of beer: meta-analysis of data with heterogeneity, dependence, and publication bias. J Health Econ 2014; 33: 180-7. [26]**

|                                                                                                   |                                                                                                                                                                                                                                                                                           |
|---------------------------------------------------------------------------------------------------|-------------------------------------------------------------------------------------------------------------------------------------------------------------------------------------------------------------------------------------------------------------------------------------------|
| Type of review / publication                                                                      | - meta-analysis<br>- Journal: J Health Econ                                                                                                                                                                                                                                               |
| Was an 'a priori' design provided?                                                                | No                                                                                                                                                                                                                                                                                        |
| Was there duplicate study selection and data extraction?                                          | No                                                                                                                                                                                                                                                                                        |
| Was a comprehensive literature search performed?                                                  | Yes. Search clearly described and comprehensive.<br>- databases: AgEcon Search, EconLit, JSTOR, RePEc, SSRN, EBSCO Host, ProQuest, ScienceDirect Journals, Wiley Online Library;<br>- Year / month of last search: August-October 2012<br>- # of studies included: 114<br>- LMIC: unclear |
| Was the status of publication (i.e. grey literature) used as an inclusion criterion?              | Yes                                                                                                                                                                                                                                                                                       |
| Was a list of studies (included and excluded) provided?                                           | No                                                                                                                                                                                                                                                                                        |
| Were the characteristics of the included studies provided?                                        | None                                                                                                                                                                                                                                                                                      |
| Was the scientific quality of the included studies assessed and documented?                       | No                                                                                                                                                                                                                                                                                        |
| Was the scientific quality of the included studies used appropriately in formulating conclusions? | n/a                                                                                                                                                                                                                                                                                       |
| Were the methods used to combine the findings of studies appropriate?                             | Yes; meta-analysis conducted using fixed- and random-effect models; results presented for full and 'restricted' samples that exclude 9 studies that used similar data; heterogeneity not formally assessed.                                                                               |
| Was the likelihood of publication bias assessed?                                                  | Yes, funnel plots, Egger tests.                                                                                                                                                                                                                                                           |
| Funding, conflicts of interest reported?                                                          | - Review: International Center for Alcohol Policies (ICAP), Washington, DC.<br>- Included studies: No.<br><br>Strong links between ICAP and alcohol industry and author's close ties to alcohol industry could be more clearly reported.                                                  |

|                          |                                                                                                                                                                                                                                                                                                                                                                                                      |
|--------------------------|------------------------------------------------------------------------------------------------------------------------------------------------------------------------------------------------------------------------------------------------------------------------------------------------------------------------------------------------------------------------------------------------------|
| Results                  | Pooled total own-price elasticities (95%CI)<br>– fixed effects:<br>- beer, full sample: -0.23 (-0.24, -0.22)<br>- beer, trimmed sample: -0.20 (-0.39, -0.31)<br>– random effects:<br>- beer, full sample: -0.35 (-0.21, -0.19)<br>- beer, trimmed sample: -0.23 (-0.27, -0.19)                                                                                                                       |
| Study's conclusion       | Overall, the analysis indicates the average price elasticity of beer is about $-0.20$ , which is 50% less elastic than previously reported averages.                                                                                                                                                                                                                                                 |
| Limitations/risk of bias | Substantial overlap with Nelson, 2013 - Health Econ Rev.<br>No formal quality assessment conducted; opaque selection of individual studies' estimates; unclear if short-run and long-run estimates have been pooled together; heterogeneity not formally assessed; efforts to minimize the potential effect of alcohol prices on alcohol use apparent; data/ results do not support all conclusions. |

*b. Individual-level data*

**Nelson JP. Does Heavy Drinking by Adults Respond to Higher Alcohol Prices and Taxes? A Survey and Assessment. *Economic Analysis and Policy* 2013; 43(3): 265-91. [27]**

|                                                                                                   |                                                                                                                                                                                                                                                                                                        |
|---------------------------------------------------------------------------------------------------|--------------------------------------------------------------------------------------------------------------------------------------------------------------------------------------------------------------------------------------------------------------------------------------------------------|
| Type of review / publication                                                                      | - narrative review<br>- Journal: <i>Econ Anal Pol</i>                                                                                                                                                                                                                                                  |
| Was an 'a priori' design provided?                                                                | No                                                                                                                                                                                                                                                                                                     |
| Was there duplicate study selection and data extraction?                                          | No                                                                                                                                                                                                                                                                                                     |
| Was a comprehensive literature search performed?                                                  | Yes. Search clearly described and comprehensive.<br>- databases: AgEcon Search, EconLit, JSTOR, RePEc, SSRN, EBSCO Host, ProQuest, ScienceDirect Journals, Wiley Online Library;<br>- Year / month of last search: August-October 2012<br>- # of studies included: 19<br>- LMIC: 1 (Shi, 2011 - China) |
| Was the status of publication (i.e. grey literature) used as an inclusion criterion?              | Yes                                                                                                                                                                                                                                                                                                    |
| Was a list of studies (included and excluded) provided?                                           | No. List of excluded studies not provided.                                                                                                                                                                                                                                                             |
| Were the characteristics of the included studies provided?                                        | Yes. Very broad characteristics of included studies were provided (study / country / time period; average age; main findings).                                                                                                                                                                         |
| Was the scientific quality of the included studies assessed and documented?                       | Some limitations were generally discussed. No formal quality assessment approach / tool used.                                                                                                                                                                                                          |
| Was the scientific quality of the included studies used appropriately in formulating conclusions? | Unclear                                                                                                                                                                                                                                                                                                |
| Were the methods used to combine the findings of studies appropriate?                             | n/a                                                                                                                                                                                                                                                                                                    |
| Was the likelihood of publication bias assessed?                                                  | n/a                                                                                                                                                                                                                                                                                                    |
| Funding, conflicts of interest reported?                                                          | - Review: International Center for Alcohol Policies (ICAP), Washington, DC.<br>- Included studies: No.<br><br>Strong links between ICAP and alcohol industry and author's close ties to alcohol industry could be more clearly reported.                                                               |

|                           |                                                                                                                                                                                                                                                                                                                                                                                                                                                                                                                            |
|---------------------------|----------------------------------------------------------------------------------------------------------------------------------------------------------------------------------------------------------------------------------------------------------------------------------------------------------------------------------------------------------------------------------------------------------------------------------------------------------------------------------------------------------------------------|
| Results                   | <p>Only broad results presented. Results generally not clearly synthesized.</p> <ul style="list-style-type: none"> <li>- heavy drinking unlikely to be associated with prices or taxes (2/19 studies found statistically significant and substantial price/ tax response by heavy drinking adults);</li> <li>- prices/taxes likely associated with moderate drinking;</li> <li>- prices/taxes possibly associated with heavy drinking among youth.</li> </ul>                                                              |
| Study's conclusion        | <p>It cannot be argued convincingly that heavy drinking by adults can be curbed extensively by higher alcohol prices or higher taxes. On the other hand, the evidence is consistent with price being important for moderate drinkers and possibly for participation and drinking by the youngest adult respondents.</p> <p>The price/ tax elasticity for heavy drinkers appears to approach zero in most instances. This result is robust across countries, time periods, drinking measures, and model specifications.</p> |
| Limitations/ risk of bias | <p>No formal quality assessment conducted; no differentiating between types of elasticities; tax and price interventions not separated; limited generalizability to LMIC.</p>                                                                                                                                                                                                                                                                                                                                              |

**Nelson JP. Gender differences in alcohol demand: a systematic review of the role of prices and taxes. Health Econ 2014; 23(10): 1260-80.[28]**

|                                                                                                   |                                                                                                                                                                                                                                                                                                                                                                                                                                      |
|---------------------------------------------------------------------------------------------------|--------------------------------------------------------------------------------------------------------------------------------------------------------------------------------------------------------------------------------------------------------------------------------------------------------------------------------------------------------------------------------------------------------------------------------------|
| Type of review / publication                                                                      | - narrative review<br>- Journal: Health Econ                                                                                                                                                                                                                                                                                                                                                                                         |
| Was an 'a priori' design provided?                                                                | No                                                                                                                                                                                                                                                                                                                                                                                                                                   |
| Was there duplicate study selection and data extraction?                                          | No                                                                                                                                                                                                                                                                                                                                                                                                                                   |
| Was a comprehensive literature search performed?                                                  | Yes. Search clearly described and comprehensive.<br>- databases: AgEcon Search, EconLit, JSTOR, RePEc, SSRN, EBSCO Host, ProQuest, ScienceDirect Journals, Wiley Online Library;<br>- Year / month of last search: August-October 2012<br>- # of studies included: 21<br>- LMIC: 5 (Andrienko, Nemtsov, 2006 - Russia; Baltagi, Geishecker, 2006 - Russia; Belanciuc, 2006 - Ukraine; Shi, 2001 - China; Tian and Liu, 2011 - China) |
| Was the status of publication (i.e. grey literature) used as an inclusion criterion?              | Yes                                                                                                                                                                                                                                                                                                                                                                                                                                  |
| Was a list of studies (included and excluded) provided?                                           | No. List of excluded studies not provided.                                                                                                                                                                                                                                                                                                                                                                                           |
| Were the characteristics of the included studies provided?                                        | Yes. Broad characteristics of included studies were provided (authors / year of publication; country; data source; sample size; average age of survey respondents; drinking measures; price or tax measure; econometric model; explanatory variables; empirical results).                                                                                                                                                            |
| Was the scientific quality of the included studies assessed and documented?                       | Some limitations were generally discussed. No formal quality assessment approach / tool used.                                                                                                                                                                                                                                                                                                                                        |
| Was the scientific quality of the included studies used appropriately in formulating conclusions? | Unclear                                                                                                                                                                                                                                                                                                                                                                                                                              |
| Were the methods used to combine the findings of studies appropriate?                             | n/a                                                                                                                                                                                                                                                                                                                                                                                                                                  |
| Was the likelihood of publication bias assessed?                                                  | n/a                                                                                                                                                                                                                                                                                                                                                                                                                                  |
| Funding, conflicts of interest reported?                                                          | - Review: International Center for Alcohol Policies (ICAP), Washington, DC.<br>- Included studies: No.<br><br>Strong links between ICAP and alcohol industry and author's close ties to alcohol industry could be more clearly reported.                                                                                                                                                                                             |

|                          |                                                                                                                                                                                                                                                                                                                                                                                                                                                                                                                                                       |
|--------------------------|-------------------------------------------------------------------------------------------------------------------------------------------------------------------------------------------------------------------------------------------------------------------------------------------------------------------------------------------------------------------------------------------------------------------------------------------------------------------------------------------------------------------------------------------------------|
| Results                  | <p>Results not clearly synthesized. Study's conclusion:</p> <ul style="list-style-type: none"> <li>- adult men had less elastic demands compared with women;</li> <li>- there was little or no price response by heavy-drinking adults, regardless of gender;</li> <li>- although the sample was small, price might be important for drinking participation for younger adults;</li> <li>- results were mixed but strongly suggested that heavy drinking by young adults, regardless of gender, was not easily dissuaded by higher prices.</li> </ul> |
| Study's conclusion       | <ul style="list-style-type: none"> <li>- First, adult men have less elastic demands compared with women;</li> <li>- Second, there is little or no price response by heavy-drinking adults, regardless of gender;</li> <li>- Third, although the sample is small, price might be important for drinking participation for younger adults;</li> <li>- Fourth, results are mixed but strongly suggest that heavy drinking by young adults, regardless of gender, is not easily dissuaded by higher prices;</li> </ul>                                    |
| Limitations/risk of bias | <p>No formal quality assessment conducted; unclear exclusion criteria; data/results do not support all conclusions; limited generalizability to LMIC.</p>                                                                                                                                                                                                                                                                                                                                                                                             |

**Nelson JP. Binge drinking and alcohol prices: a systematic review of age-related results from econometric studies, natural experiments and field studies. Health Econ Rev 2015; 5: 6.[29]**

|                                                                                                   |                                                                                                                                                                                                                                          |
|---------------------------------------------------------------------------------------------------|------------------------------------------------------------------------------------------------------------------------------------------------------------------------------------------------------------------------------------------|
| Type of review / publication                                                                      | - narrative review<br>- Journal: Health Econ Rev                                                                                                                                                                                         |
| Was an 'a priori' design provided?                                                                | No                                                                                                                                                                                                                                       |
| Was there duplicate study selection and data extraction?                                          | No                                                                                                                                                                                                                                       |
| Was a comprehensive literature search performed?                                                  | Yes. Search comprehensive but poorly described.<br>- databases: EconLit, JSTOR, ProQuest, Wiley Online Library, MEDLINE (PubMed), EMBASE;<br>- Year / month of last search: not reported<br>- # of studies included: 65<br>- LMIC: 0     |
| Was the status of publication (i.e. grey literature) used as an inclusion criterion?              | Yes                                                                                                                                                                                                                                      |
| Was a list of studies (included and excluded) provided?                                           | No. List of excluded studies not provided.                                                                                                                                                                                               |
| Were the characteristics of the included studies provided?                                        | Yes. Broad characteristics of included studies were provided (binge drinking measures & quantity, price / tax measures, statistical significance, data, methods, controls, results)                                                      |
| Was the scientific quality of the included studies assessed and documented?                       | Some limitations were generally discussed. No formal quality assessment approach / tool used.                                                                                                                                            |
| Was the scientific quality of the included studies used appropriately in formulating conclusions? | Unclear                                                                                                                                                                                                                                  |
| Were the methods used to combine the findings of studies appropriate?                             | n/a                                                                                                                                                                                                                                      |
| Was the likelihood of publication bias assessed?                                                  | n/a                                                                                                                                                                                                                                      |
| Funding, conflicts of interest reported?                                                          | - Review: International Center for Alcohol Policies (ICAP), Washington, DC.<br>- Included studies: No.<br><br>Strong links between ICAP and alcohol industry and author's close ties to alcohol industry could be more clearly reported. |



|                          |                                                                                                                                                                                                                                                                                                                                                                                                                                                                                                                                                                                                                                                                                                                                                      |
|--------------------------|------------------------------------------------------------------------------------------------------------------------------------------------------------------------------------------------------------------------------------------------------------------------------------------------------------------------------------------------------------------------------------------------------------------------------------------------------------------------------------------------------------------------------------------------------------------------------------------------------------------------------------------------------------------------------------------------------------------------------------------------------|
| Results                  | <p>Effects of prices/taxes on binge drinking, among youth, young adult, and adult population varied between studies. Overall, very heterogeneous and mixed evidence:</p> <ul style="list-style-type: none"> <li>- for youth 3/18 studies found statistically significant protective effects on heavy drinking from price/tax interventions, 10 null results, and others mixed;</li> <li>- for young adults 1/5 studies which pooled men and women found statistically significant protective effects, 2/7 found significant protective effects for men, and 2/4 found significant protective effects for women;</li> <li>- for adults 5/19 studies indicated statistically significant protective effects and 4/19 suggest mixed results.</li> </ul> |
| Study's conclusion       | <ul style="list-style-type: none"> <li>- First, adult men were found to be less price responsive than women;</li> <li>- Second, there was little or no price response by heavy-drinking adults, regardless of sex;</li> <li>- Third, although the sample was small, price may have been important for drinking participation for younger adults;</li> <li>- Fourth, results were mixed but strongly suggested that heavy drinking by young adults, regardless of sex, was not easily dissuaded by higher prices;</li> </ul>                                                                                                                                                                                                                          |
| Limitations/risk of bias | <p>No formal quality assessment conducted; unclear exclusion criteria; data/results do not support all conclusions; limited generalizability to LMIC.</p>                                                                                                                                                                                                                                                                                                                                                                                                                                                                                                                                                                                            |

*c. impact of tax/price policy changes in 5 countries (Denmark, Finland, Hong Kong, Sweden, Switzerland)*

**Nelson JP, McNall AD. What happens to drinking when alcohol policy changes? A review of five natural experiments for alcohol taxes, prices, and availability. Eur J Health Econ 2017; 18(4): 417-34.[30]**

|                                                                                                   |                                                                                                                                                                                                                                                           |
|---------------------------------------------------------------------------------------------------|-----------------------------------------------------------------------------------------------------------------------------------------------------------------------------------------------------------------------------------------------------------|
| Type of review / publication                                                                      | - narrative review<br>- Journal: Eur J Health Econ                                                                                                                                                                                                        |
| Was an 'a priori' design provided?                                                                | No                                                                                                                                                                                                                                                        |
| Was there duplicate study selection and data extraction?                                          | Yes                                                                                                                                                                                                                                                       |
| Was a comprehensive literature search performed?                                                  | No. Search clearly described but not comprehensive.<br>- databases: PubMed, AMPHORA, International Alliance for Responsible Drinking (IARD) research database;<br>- Year / month of last search: not reported<br>- # of studies included: 29<br>- LMIC: 0 |
| Was the status of publication (i.e. grey literature) used as an inclusion criterion?              | Yes                                                                                                                                                                                                                                                       |
| Was a list of studies (included and excluded) provided?                                           | Yes, list of included and excluded studies were provided (list of excluded provided upon request)                                                                                                                                                         |
| Were the characteristics of the included studies provided?                                        | Yes. Broad characteristics of included studies were provided (authors; country; data; methods; policy effects).                                                                                                                                           |
| Was the scientific quality of the included studies assessed and documented?                       | Some limitations were generally discussed. No formal quality assessment approach / tool used.                                                                                                                                                             |
| Was the scientific quality of the included studies used appropriately in formulating conclusions? | Unclear                                                                                                                                                                                                                                                   |
| Were the methods used to combine the findings of studies appropriate?                             | n/a                                                                                                                                                                                                                                                       |
| Was the likelihood of publication bias assessed?                                                  | n/a                                                                                                                                                                                                                                                       |
| Funding, conflicts of interest reported?                                                          | - Review: International Center for Alcohol Policies (ICAP), Washington, DC.<br>- Included studies: No.<br><br>Strong links between ICAP and alcohol industry and author's close ties to alcohol industry could be more clearly reported.                  |

|                          |                                                                                                                                                                                                                                                                                                                                                                                                                                                                                                                        |
|--------------------------|------------------------------------------------------------------------------------------------------------------------------------------------------------------------------------------------------------------------------------------------------------------------------------------------------------------------------------------------------------------------------------------------------------------------------------------------------------------------------------------------------------------------|
| Results                  | <p>The review assessed the impact of tax/price policy changes in five countries (Denmark, Finland, Hong Kong, Sweden, Switzerland). Results not clearly synthesized; little to no discussion of effect sizes; of the 29 studies included, 13 used Nordic Tax Study (NTS) data:</p> <ul style="list-style-type: none"> <li>- binge drinking was reduced in 4/18 studies included; young adults and youth responded to changes in 4/14 studies, and changes seemed to have had little effect on older adults.</li> </ul> |
| Study's conclusion       | <ul style="list-style-type: none"> <li>- General lack of consistent results that can provide a sound evidence-base for development of alcohol tax policy;</li> <li>- Effectiveness of prices and taxes still open to debate;</li> <li>- Evidence from five countries tends to support more nuanced effects that depend on time, place, demographics, culture, and so forth.</li> </ul>                                                                                                                                 |
| Limitations/risk of bias | <p>Search strategy not comprehensive; no formal quality assessment conducted; poorly justified or unclear exclusion criteria; data/results do not support all conclusions; limited generalizability to LMIC.</p>                                                                                                                                                                                                                                                                                                       |

## Appendix 6. Excluded studies

### *Not a review*

- Adams, M., and Effertz, T. (2010). Effective prevention against risky underage drinking--the need for higher excise taxes on alcoholic beverages in Germany. *Alcohol and Alcoholism*, 45(4): 387-394.
- Anderson, K. (2010). Reforming Taxes on Wine and Other Alcoholic Beverage Consumption. *Economic Papers A Journal of Applied Economics and Policy*, 29(2): 107-199.
- Anderson, P. (1998). Alcohol, cardiovascular diseases and public health policy. *Novartis Foundation Symposium*, 216: 237-48.
- Anderson, P. (2009). Global alcohol policy and the alcohol industry. *Current Opinion in Psychiatry*, 22(3): 253-7.
- Anderson, K., Valenzuela, E., and Wittwer, G. (2011). Wine Export Shocks and Wine Tax Reform in Australia: Regional Consequences Using an Economy-Wide Approach. *Economic Papers A Journal of Applied Economics and Policy*, 30(3): 386-399.
- Mora, T. (2018). [On alcoholic beverage taxation in Spain]. *Gaceta Sanitaria*, 32(2): 176-180.
- Bennett, R. (2008). Alcohol: price, policy and public health. Report on the findings of the expert workshop on price convened by SHAAP. *Alcohol Alcohol*, 43(2): 123.
- Chelwa G., Toan P.N., Hien N.T.T., Thu L.T, Anh P.T.H., and Ross, H. (2019). Do beer and wine respond to price and tax changes in Vietnam? Evidence from the Vietnam Household Living Standards Survey. *BMJ Open*, 9:e027076.
- Task Force on Community Health Preventative Services. (2010). Increasing Alcoholic Beverage Taxes Is Recommended to Reduce Excessive Alcohol Consumption and Related Harms. Task Force on Community Health Preventative Services. *American Journal of Preventative Medicine*, 38(2): 230-232.
- Ludbrook, A., Holmes, J., and Stockwell, T. (2014). Gender Differences in Alcohol Demand: A Systematic Review of the Role of Prices and Taxes: Comment. *Health Economics*, 23: 1281-1283.

### *Qualitative reviews*

- Matanje Mwangomba, B.L., Nkhata, M.J., Baldacchino, A., Wisdom, J., and Ngwira, B. (2018). Alcohol policies in Malawi: inclusion of WHO "best buy" interventions and use of multi-sectoral action. *BMC Public Health*, 18:957.
- Al-Ansari, B., Thow, A.M., Mirzaie, M., Day, C.A., and Conigrave, K.M. (2019). Alcohol policy in Iran: Policy content analysis. *Int J Drug Policy*, 73:185-198.

### *Broader reviews with not enough relevant details to extract and synthesize*

- n/a. (2000). Economic analysis aids alcohol research. *Alcohol Research & Health : the journal of the National Institute on Alcohol Abuse and Alcoholism*, 24(1):62-71.
- n/a. (2010). Latest approaches to preventing alcohol abuse and alcoholism. *Alcohol Research & Health : the journal of the National Institute on Alcohol Abuse and Alcoholism*, 24(1): 42-51.
- de Walque, Damien. (2020). The use of financial incentives to prevent unhealthy behaviors: A review. *Soc Sci Med* 261:113236.
- Elliott, Lana M, Sarah L Dalglish, and Stephanie M Topp. (2020). Health Taxes on Tobacco, Alcohol, Food

and Drinks in Low- and Middle-Income Countries: A Scoping Review of Policy Content, Actors, Process and Context. *Int J Health Policy Manag.*

Lai, T., and Habicht, J. (2011). Decline in alcohol consumption in Estonia: combined effects of strengthened alcohol policy and economic downturn. *Alcohol Alcohol*, 46(2): 200-3.

Chaloupka, F.J., Powell, L.M., and Warner, K.E. (2019). The Use of Excise Taxes to Reduce Tobacco, Alcohol, and Sugary Beverage Consumption. *Annu Rev Public Health*, 40:187-201.

Miracolo, Aurelio, Marisa Sophiea, Mackenzie Mills, and Panos Kanavos. (2021). Sin taxes and their effect on consumption, revenue generation and health improvement: a systematic literature review in Latin America. *Health Policy Plan* 36 (5):790-810.

Neufeld, Maria, Anastacia Bobrova, Kairat Davletov, Mindaugas Stelemekas, Relika Stoppel, Carina Ferreira-Borges, Joao Breda, and Jurgen Rehm. (2021). Alcohol control policies in Former Soviet Union countries: A narrative review of three decades of policy changes and their apparent effects. *Drug Alcohol Rev* 40 (3):350-367.

Rehm, Jurgen, Maria Neufeld, Robin Room, Bundit Sornpaisarn, Mindaugas Stelemekas, Monica H Swahn, and Dirk W Lachenmeier. (2022). The impact of alcohol taxation changes on unrecorded alcohol consumption: A review and recommendations. *Int J Drug Policy* 99:103420.

Xu, X., and Chaloupka, F. J. (2011). The effects of prices on alcohol use and its consequences. *Alcohol Res Health*, 34(2): 236-45.

*Not focused enough on tax/price*

Cook, P. J., and Moore, M. J. (2002). The economics of alcohol abuse and alcohol-control policies. *Health Affairs*, 21(2):120-133.

Osterberg, E. (1992). Effects of alcohol control measures on alcohol consumption. *International Journal of the Addictions*, 27(2): 209-225.

Greisen, C., Grossman, E.R., Siegel, M., and Sager, M. (2019). Public Health and the Four P's of Marketing: Alcohol as a Fundamental Example. *J Law Med Ethics*, 47(S2): 51-54.

Anderson, P., Gual, A., & Rehm, J. (2018). Reducing the health risks derived from exposure to addictive substances. *Current Opinion in Psychiatry*, 31(4): 333-341.

Kerr, W.C., Williams, E., Ye, Y., Subbaraman, M.S., and Greenfield T.K. (2018). Survey estimates of changes in alcohol use patterns following the 2012 privatization of the Washington liquor monopoly. *Alcohol Alcohol*, 53(4): 470-476.

Anderson, P. (2011). Policy implications of the WHO strategy to reduce the harmful use of alcohol. *Sucht*, 57(2): 85-98.

Rice, P. (2019). Plus ca change, plus c'est la meme chose: A review of recent alcohol policy developments in Europe. *Alcohol and Alcoholism*, 54(2): 123-127.

## Appendix 7. Review Research Protocol

Based on PROSPERO (Prospective Register of Systematic Reviews).

### *Review title*

Prices, taxes and alcohol use: a systematic review of reviews

### *Anticipated or actual start date*

January, 2014

### *Anticipated completion date*

January, 2016

### *Stage of review:*

The review has started

#### *Review stage*

- a. Preliminary searches
  - i. started: y; completed: n
- b. Piloting the study selection process
  - i. started: y; completed: n
- c. Formal screening of search results against eligibility criteria
  - i. started: y; completed: n
- d. Data extraction
  - i. started: n; completed: n
- e. Risk of bias (quality) assessment
  - i. started: n; completed: n
- f. Data analysis
  - i. started: n; completed: n

### *Named contact*

G. Emmanuel Guindon

emmanuel.guindon@mcmaster.ca

McMaster University, Centre for Health Economics and Policy Analysis

CRL Building, room 229

1280 Main Street West

Hamilton, Ontario, Canada, L8S 4K1

### *Review team members*

Guillermo Paraje, Universidad Adolfo Ibáñez

Bruce Baskerville, University of Waterloo

### *Funding sources/sponsors*

International Development Research Centre

### *Conflicts of interest*

None

### *Collaborators*

KS Brown, FJ Chaloupka, T Pantoja

### *Review question*

What is the impact of prices and taxes on alcohol use:

- Total own-price elasticities, including short-run vs. long-run;
- Participation/ consumption own-price elasticities;
- Associations between prices/ taxes and the transition from non-drinkers to drinkers and from drinkers to non-drinkers;
- Associations between prices/ taxes and heavy episodic drinking such as binge drinking, or any type of excessive, unhealthy or harmful drinking;
- Associations between non-tax price strategies such as minimum pricing of alcohol on alcohol use;
- Cross-price elasticities, between alcohol products, and between alcohol products and other non-alcoholic goods such as tobacco and psychoactive drugs.

### *Searches*

MEDLINE: ((pric\* OR tax\* OR fiscal\*)) AND (Alcohol drinking(MeSH) OR Alcohol\* drink\* OR Alcoholic beverages(MeSH) OR Alcohol\* beverage\* OR Beer(MeSH) OR Beer\* OR Wine(MeSH) OR Wine\* OR Liquor\* OR Spirits OR Alcohol\*) AND review\*

EconLit: (TI(alcohol\* OR wine\* OR beer OR spirit\* OR liquor\*) OR AB(alcohol\* OR wine\* OR beer OR spirit\* OR liquor\*)) AND (TI(tax\* OR price\* OR fiscal\* OR elasticit\*) OR AB(tax\* OR price\* OR fiscal\* OR elasticit\*)) AND (TI(review\*) OR AB(review\*))

Embase:

1. pric\*.mp.
2. tax\*.mp.
3. fiscal\*.mp.
4. 1 or 2 or 3
5. Alcohol drinking.mp. or exp drinking behavior /
6. Alcohol drink.mp.
7. exp alcoholic beverage /
8. exp alcohol consumption/ or Alcohol beverage.mp.
9. beer.mp. or exp beer /
10. exp wine/ or wine.mp.
11. Liquor.mp.
12. Spirits.mp.
13. Alcohol.mp.
14. 5 or 6 or 7 or 8 or 9 or 10 or 11 or 12 or 13
15. "review" /
16. 4 and 14 and 15

LILACS: tw:(tw:(tw:(pric\*)) OR (tw:(tax\*)) AND (tw:(liquor\*)) OR (tw:(spirits)) OR (tw:(beer\*)) OR (tw:(wine)) OR (tw:(alcohol)) OR (mh:(alcohol beverages)) OR (mh:(beer)) OR (mh:(wine)) OR (mh:(alcohol drinking))) AND ( db:("LILACS") AND type\_of\_study:(("systematic\_reviews"))) AND ( type\_of\_study:(("systematic\_reviews" OR "overview" OR "policy\_brief" OR "sysrev\_observational\_studies" OR "structured\_summary\_of\_systematic\_review")))

### *Intervention(s), exposure(s)*

Prices, taxes (changes, levels)

### *Comparator(s)/control*

When applicable, pre- price/ tax changes.

*Types of study to be included*

Reviews of studies that quantitatively examined the relationship between alcohol price and tax strategies and alcohol use

*Context*

All reviews; specific interest in low- and middle-income countries

*Main outcome*

Alcohol use

*Data extraction (selection and coding)*

- review type
- a priori protocol
- duplicate study selection and data extraction
- comprehensive search
- list of included / excluded studies
- characteristics of included studies
- assessment of the quality of the included studies
- methods to combine study findings
- assessment of likelihood of publication bias
- funding and competing clearly reported

*Risk of bias (quality) assessment*

Assessment of Multiple Systematic Reviews (AMSTAR) tool

*Strategy for data synthesis*

Narrative synthesis

*Analysis of subgroups or subsets*

Socioeconomic status, sex, age

*Type and method of review*

Systematic narrative review of reviews

*Language*

No exclusion

*Keywords*

alcohol; prices; taxes; review; low- and middle-income countries
